# Supplementary material for: Palladium/norbornene-catalyzed diversified trifunctionalization of aryl-thianthreniums
Source: Royal Society of Chemistry journal article supplement (doi:10.1039/d4cc01426j), 2024-01-01

# Palladium/norbornene-catalyzed trifunctionalization of aryl-thianthreniums

Jiang Nan,<sup>a\*</sup> Min Lei,<sup>a</sup> Gaoyang Chen,<sup>a</sup> Yangmin Ma,<sup>a</sup> Chengyuan Liang,<sup>b</sup> Jing Wang<sup>a</sup>

<sup>a</sup>College of Chemistry and Chemical Engineering, Shaanxi University of Science and Technology, Xi'an 710021, China.

<sup>b</sup>Xi'an Key Laboratory of Antiviral and Antimicrobial-Resistant Bacteria Therapeutics Research, School of Food and Biological Engineering, Shaanxi University of Science and Technology, Xi'an 710021, China.

Email: nanjiang@sust.edu.cn

## Electronic Supplementary Information

### Table of Contents:

|                                                                 |    |
|-----------------------------------------------------------------|----|
| A. General information .....                                    | 2  |
| B. Optimization of Reaction Conditions .....                    | 2  |
| C. Substrate Scope .....                                        | 3  |
| D. Substrate Scope of Electrophilic Amination .....             | 19 |
| E. Substrate Scope of Electrophilic Deuterated-Methylation..... | 21 |
| F. Behavior of Two-Component Catellani Reaction.....            | 22 |
| G. Substrate Scope of Terminating Reagents .....                | 23 |
| H. Reactivity of Aryl-TTs and Recovery Study .....              | 25 |
| I. NMR spectra .....                                            | 28 |

## A. General information

All reagents were used from commercial received unless otherwise noted. Analytical thin-layer chromatography was performed with 0.25 mm coated commercial silica gel plates (TLC Silica Gel 60 F<sub>254</sub>); visualization of the developed chromatogram was performed by fluorescence. Flash Chromatography was performed with silica gel (300-400 mesh). Proton-1 nuclear magnetic resonance (<sup>1</sup>H NMR) data were acquired at 400 MHz on a Bruker Ascend 400 (400 MHz) spectrometer, and chemical shifts are reported in delta (δ) units, in parts per million (ppm) downfield from tetramethylsilane. Splitting patterns are designated as s, singlet; d, doublet; t, triplet; q, quartet; m, multiplet, coupling constants *J* are quoted in Hz. Carbon-13 nuclear magnetic resonance (<sup>13</sup>C NMR) data were acquired at 100 MHz on a Bruker Ascend 400 spectrometer, chemical shifts are reported in ppm relative to the center line of a triplet at 77.0 ppm for CDCl<sub>3</sub>. High resolution mass spectra were acquired on a Bruker Daltonics MicroTof-Q II mass spectrometer.

## B. Optimization of Reaction Conditions

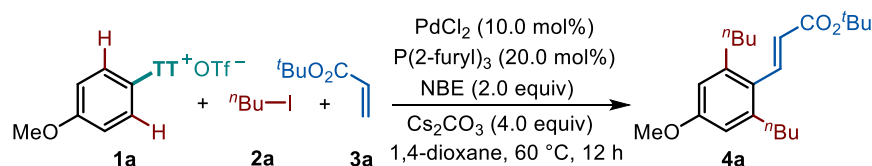

| Entry | Variations from standard conditions                                                              | Yield <sup>b</sup> of <b>4a</b> |
|-------|--------------------------------------------------------------------------------------------------|---------------------------------|
| 1     | None                                                                                             | 86%                             |
| 2     | Pd(OAc) <sub>2</sub> instead of PdCl <sub>2</sub>                                                | 80%                             |
| 3     | Pd(TFA) <sub>2</sub> instead of PdCl <sub>2</sub>                                                | 25%                             |
| 4     | Pd <sub>2</sub> (dba) <sub>3</sub> instead of PdCl <sub>2</sub>                                  | trace                           |
| 5     | P( <i>p</i> -MeO-C <sub>6</sub> H <sub>4</sub> ) <sub>3</sub> instead of P(2-furyl) <sub>3</sub> | 55%                             |
| 6     | PCy <sub>3</sub> instead of P(2-furyl) <sub>3</sub>                                              | 43%                             |
| 7     | X-Phos instead of P(2-furyl) <sub>3</sub>                                                        | 59%                             |
| 8     | K <sub>2</sub> CO <sub>3</sub> instead of Cs <sub>2</sub> CO <sub>3</sub>                        | 57%                             |
| 9     | Na <sub>2</sub> CO <sub>3</sub> instead of Cs <sub>2</sub> CO <sub>3</sub>                       | 21%                             |
| 10    | K <sub>2</sub> PO <sub>4</sub> instead of Cs <sub>2</sub> CO <sub>3</sub>                        | 73%                             |
| 11    | toluene instead of 1,4-dioxane                                                                   | 68%                             |
| 12    | MeCN instead of 1,4-dioxane                                                                      | 65%                             |
| 13    | THF instead of 1,4-dioxane                                                                       | 79%                             |
| 14    | Other NBEs and analogues                                                                         | seeing below                    |
| 15    | 1.0 equiv NBE instead of 2.0 equiv NBE                                                           | 44%                             |
| 16    | 0.5 equiv NBE instead of 2.0 equiv NBE                                                           | 34%                             |

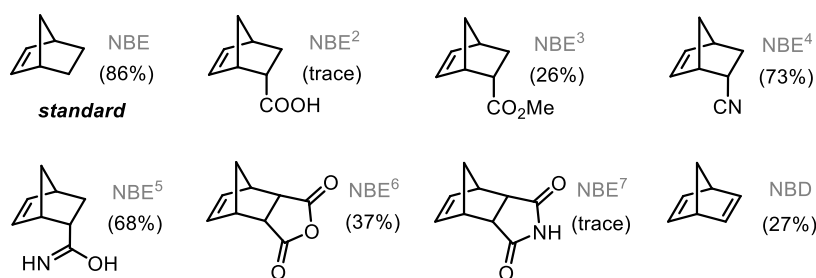

### C. Substrate Scope

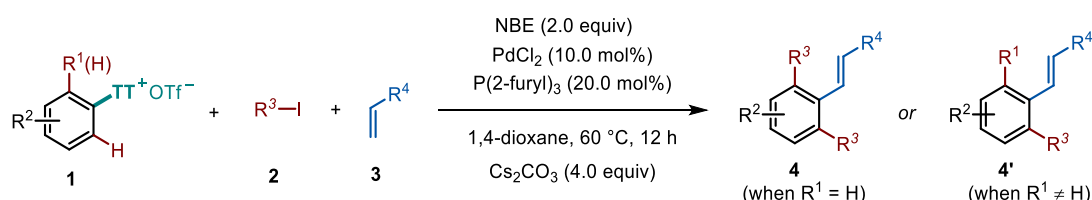

A 15.0 mL vial equipped with a stir bar was charged with PdCl<sub>2</sub> (3.6 mg, 10.0 mol%), P(2-furyl)<sub>3</sub>, (9.3 mg, 20.0 mol%), norbornene (36.0 mg, 2.0 equiv), Cs<sub>2</sub>CO<sub>3</sub> (260.0 mg, 4.0 equiv), **1** (0.2 mmol), **2** (0.6 mmol), **3** (0.24 mmol) and 1,4-dioxane (2.0 mL) was then added under argon atmosphere. The reaction mixture was stirred at 60 °C for 12 h in an oil bath. After cooling to room temperature, the mixture was extracted with ethyl acetate, dried over anhydrous MgSO<sub>4</sub> and concentrated under reduced pressure. The residue was then chromatographed on silica gel to afford the desired product **4** or **4'**.

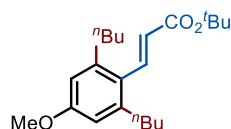

#### *tert*-Butyl (*E*)-3-(2,6-dibutyl-4-methoxyphenyl) acrylate (**4aa**)

White solid (61.6 mg, 89% yield). PE:EA = 40:1, R<sub>f</sub> = 0.45. <sup>1</sup>H NMR (400 MHz, CDCl<sub>3</sub>) δ 7.74 (d, *J* = 16.3 Hz, 1H), 6.61 (s, 2H), 5.89 (d, *J* = 16.3 Hz, 1H), 3.80 (s, 3H), 2.62 (t, *J* = 8.0 Hz, 4H), 1.54 (s, 9H), 1.54 – 1.50 (m, 4H), 1.41 – 1.33 (m, 4H), 0.92 (t, *J* = 7.3 Hz, 6H). <sup>13</sup>C NMR (100 MHz, CDCl<sub>3</sub>) δ 166.2, 159.0, 143.2, 142.1, 126.2, 124.7, 112.4, 80.3, 55.0, 33.8, 33.3, 28.2, 22.6, 13.9. IR (KBr): 2961, 2542, 2313, 1708, 1464, 1287, 1146, 758 cm<sup>-1</sup>. HRMS (ESI) *m/z* Calcd for C<sub>22</sub>H<sub>35</sub>O<sub>3</sub> [M+H]<sup>+</sup> 347.2581, found 347.2576.

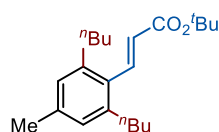

#### *tert*-Butyl (*E*)-3-(2,6-dibutyl-4-methylphenyl) acrylate (**4ab**)

White solid (51.5 mg, 78% yield). PE:EA = 40:1,  $R_f = 0.4$ .  $^1\text{H NMR}$  (400 MHz,  $\text{CDCl}_3$ )  $\delta$  7.77 (d,  $J = 16.3$  Hz, 1H), 6.89 (s, 2H), 5.92 (d,  $J = 16.3$  Hz, 1H), 2.60 (t,  $J = 7.2$  Hz, 4H), 2.31 (s, 3H), 1.55 (s, 9H), 1.55 – 1.48 (m, 4H), 1.41 – 1.33 (m, 4H), 0.93 (t,  $J = 7.3$  Hz, 6H).  $^{13}\text{C NMR}$  (100 MHz,  $\text{CDCl}_3$ )  $\delta$  166.0, 142.5, 141.2, 137.6, 130.8, 127.8, 125.3, 80.3, 33.4, 28.2, 22.6, 21.2, 13.9. IR (KBr): 2919, 2541, 2313, 1982, 1714, 1517, 1270, 1103  $\text{cm}^{-1}$ . HRMS (ESI)  $m/z$  Calcd for  $\text{C}_{22}\text{H}_{35}\text{O}_2$   $[\text{M}+\text{H}]^+$  331.2632, found 331.2624.

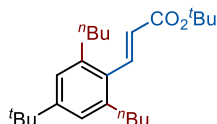

***tert*-Butyl (*E*)-3-(4-(*tert*-butyl)-2,6-dibutylphenyl) acrylate (4ac)**

White oil (63.3 mg, 85% yield). PE:EA = 40:1,  $R_f = 0.35$ .  $^1\text{H NMR}$  (400 MHz,  $\text{CDCl}_3$ )  $\delta$  7.77 (d,  $J = 16.3$  Hz, 1H), 7.07 (s, 2H), 5.93 (d,  $J = 16.3$  Hz, 1H), 2.62 (t,  $J = 7.2$  Hz, 4H), 1.55 (s, 9H), 1.54 – 1.47 (m, 4H), 1.41 – 1.35 (m, 4H), 1.32 (s, 9H), 0.93 (t,  $J = 7.3$  Hz, 6H).  $^{13}\text{C NMR}$  (100 MHz,  $\text{CDCl}_3$ )  $\delta$  166.1, 150.7, 142.5, 140.8, 130.8, 125.3, 124.1, 80.3, 34.4, 33.8, 33.5, 31.2, 28.2, 22.7, 13.9. IR (KBr): 2985, 2718, 2362, 1984, 1624, 1527, 1370, 1002  $\text{cm}^{-1}$ . HRMS (ESI)  $m/z$  Calcd for  $\text{C}_{25}\text{H}_{41}\text{O}_2$   $[\text{M}+\text{H}]^+$  373.3101, found 373.3092.

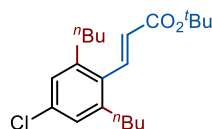

***tert*-Butyl (*E*)-3-(2,6-dibutyl-4-chlorophenyl) acrylate (4ad)**

White solid (61.0 mg, 88% yield). PE:EA = 20:1,  $R_f = 0.5$ .  $^1\text{H NMR}$  (400 MHz,  $\text{CDCl}_3$ )  $\delta$  7.67 (d,  $J = 16.3$  Hz, 1H), 7.04 (s, 2H), 5.90 (d,  $J = 16.3$  Hz, 1H), 2.57 (t,  $J = 7.2$  Hz, 4H), 1.54 (s, 9H), 1.63 – 1.46 (m, 4H), 1.38 – 1.31 (m, 4H), 0.92 (t,  $J = 7.3$  Hz, 6H).  $^{13}\text{C NMR}$  (100 MHz,  $\text{CDCl}_3$ )  $\delta$  165.6, 143.0, 141.4, 133.5, 132.4, 126.7, 126.5, 33.3, 33.0, 28.2, 22.5, 13.8. IR (KBr): 2971, 2569, 2313, 1983, 1706, 1640, 1293, 1147  $\text{cm}^{-1}$ . HRMS (ESI)  $m/z$  Calcd for  $\text{C}_{21}\text{H}_{32}\text{ClO}_2$   $[\text{M}+\text{H}]^+$  351.2085, found 351.2092.

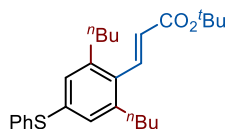

***tert*-Butyl (*E*)-3-(3,5-dibutyl-[1,1'-biphenyl]-4-yl) acrylate (4ae)**

White oil (67.5 mg, 86% yield). PE:EA = 30:1,  $R_f = 0.4$ .  $^1\text{H NMR}$  (400 MHz,  $\text{CDCl}_3$ )  $\delta$  7.72

(d,  $J = 16.3$  Hz, 1H), 7.34 (t,  $J = 5.9$  Hz, 3H), 7.31 (d,  $J = 16.3$  Hz, 1H), 7.26 (d,  $J = 2.6$  Hz, 1H), 7.03 (s, 2H), 5.93 (d,  $J = 16.3$  Hz, 1H), 2.56 (d,  $J = 7.1$  Hz, 4H), 1.54 (s, 9H), 1.52 – 1.44 (m, 4H), 1.35 – 1.29 (m, 4H), 0.89 (t,  $J = 7.3$  Hz, 6H).  $^{13}\text{C}$  NMR (100 MHz,  $\text{CDCl}_3$ )  $\delta$  165.7, 142.2, 141.7, 135.6, 135.0, 132.8, 130.9, 129.1, 129.1, 127.0, 126.0, 80.5, 33.3, 33.0, 28.2, 22.4, 13.8. IR (KBr): 2961, 2516, 2313, 1710, 1639, 1464, 1304, 746  $\text{cm}^{-1}$ . HRMS (ESI)  $m/z$  Calcd for  $\text{C}_{27}\text{H}_{37}\text{O}_2\text{S}$   $[\text{M}+\text{H}]^+$  425.2509, found 425.2504.

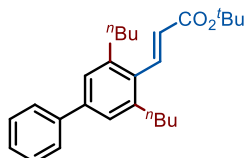

***tert*-Butyl (*E*)-3-(3,5-dibutyl-[1,1'-biphenyl]-4-yl) acrylate (4af)**

White solid (67.3 mg, 86% yield). PE:EA = 40:1,  $R_f = 0.45$ ,  $^1\text{H}$  NMR (400 MHz,  $\text{CDCl}_3$ )  $\delta$  7.83 (d,  $J = 16.3$  Hz, 1H), 7.61 (d,  $J = 8.2$  Hz, 2H), 7.45 (t,  $J = 7.9$  Hz, 2H), 7.35 (t,  $J = 8.1$  Hz, 1H), 7.31 (s, 2H), 6.00 (d,  $J = 16.4$  Hz, 1H), 2.71 (t,  $J = 8.0$  Hz, 4H), 1.65 – 1.58 (m, 4H), 1.57 (s, 9H), 1.44 – 1.36 (m, 4H), 0.95 (t,  $J = 8.1$  Hz, 6H).  $^{13}\text{C}$  NMR (100 MHz,  $\text{CDCl}_3$ )  $\delta$  165.9, 142.2, 141.7, 140.9, 140.6, 132.9, 128.7, 127.3, 127.1, 125.8, 125.8, 80.5, 33.6, 33.4, 28.2, 22.6, 13.9. IR (KBr): 2963, 2745, 2313, 2103, 1709, 1640, 1587, 1307, 757  $\text{cm}^{-1}$ . HRMS (ESI)  $m/z$  Calcd for  $\text{C}_{27}\text{H}_{37}\text{O}_2$   $[\text{M}+\text{H}]^+$  393.2788, found 393.2792.

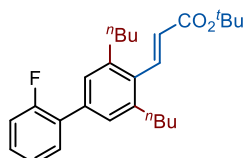

***tert*-Butyl (*E*)-3-(3,5-dibutyl-2'-fluoro-[1,1'-biphenyl]-4-yl) acrylate (4ag)**

White solid (69.7 mg, 85% yield). PE:EA = 40:1,  $R_f = 0.35$ ,  $^1\text{H}$  NMR (400 MHz,  $\text{CDCl}_3$ )  $\delta$  7.81 (d,  $J = 16.3$  Hz, 1H), 7.45 (t,  $J = 7.8$  Hz, 1H), 7.32 (t,  $J = 7.8$  Hz, 1H), 7.26 (s, 2H), 7.22 (d,  $J = 7.5$  Hz, 1H), 7.16 (d,  $J = 9.5$  Hz, 1H), 5.99 (d,  $J = 16.3$  Hz, 1H), 2.68 (t,  $J = 7.9$  Hz, 4H), 1.65 – 1.57 (m, 4H), 1.56 (s, 9H), 1.43 – 1.35 (m, 4H), 0.94 (t,  $J = 7.4$  Hz, 6H).  $^{13}\text{C}$  NMR (100 MHz,  $\text{CDCl}_3$ )  $\delta$  165.9, 161.0, 158.5, 142.1, 141.3, 135.2, 133.3, 130.6 (d,  $J = 3.6$  Hz), 128.9, 128.9, 127.5 (d,  $J = 2.8$  Hz), 126.0, 124.3 (d,  $J = 3.6$  Hz), 116.2, 115.9, 33.5, 33.3, 28.2, 22.6, 13.9. IR (KBr): 2964, 2593, 2313, 1709, 1640, 1512, 1151, 755  $\text{cm}^{-1}$ . HRMS (ESI)  $m/z$  Calcd for  $\text{C}_{27}\text{H}_{36}\text{FO}_2$   $[\text{M}+\text{H}]^+$  411.2694, found 411.2700.

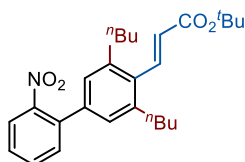

***tert*-Butyl (*E*)-3-(3,5-dibutyl-2'-nitro-[1,1'-biphenyl]-4-yl) acrylate (4ah)**

White solid (45.5 mg, 52% yield). PE:EA = 20:1,  $R_f = 0.4$ ,  $^1\text{H NMR}$  (400 MHz,  $\text{CDCl}_3$ )  $\delta$  7.83 (d,  $J = 8.6$  Hz, 1H), 7.78 (d,  $J = 16.3$  Hz, 1H), 7.61 (t,  $J = 7.9$  Hz, 1H), 7.46 (t,  $J = 7.9$  Hz, 2H), 7.01 (s, 2H), 5.98 (d,  $J = 16.3$  Hz, 1H), 2.68 – 2.60 (t,  $J = 8.0$  Hz, 4H), 1.55 (s, 9H), 1.55 – 1.49 (m, 4H), 1.40 – 1.33 (m, 4H), 0.92 (t,  $J = 7.3$  Hz, 6H).  $^{13}\text{C NMR}$  (100 MHz,  $\text{CDCl}_3$ )  $\delta$  165.7, 149.3, 141.8, 141.5, 136.7, 136.1, 134.0, 132.1, 131.8, 128.0, 126.3, 124.0, 80.6, 33.4, 33.1, 28.2, 22.5, 13.9. IR (KBr): 2959, 2556, 2313, 1902, 1709, 1526, 1152, 753  $\text{cm}^{-1}$ . HRMS (ESI)  $m/z$  Calcd for  $\text{C}_{27}\text{H}_{36}\text{NO}_4$   $[\text{M}+\text{H}]^+$  438.2639, found 438.2635.

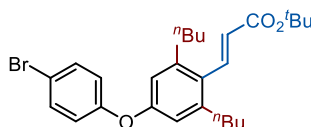

***tert*-Butyl (*E*)-3-(4-(4-bromophenoxy)-2,6-dibutylphenyl) acrylate (4ai)**

White solid (76.8 mg, 79% yield). PE:EA = 40:1,  $R_f = 0.45$ ,  $^1\text{H NMR}$  (400 MHz,  $\text{CDCl}_3$ )  $\delta$  7.72 (d,  $J = 16.3$  Hz, 1H), 7.43 (d,  $J = 8.9$  Hz, 2H), 6.89 (d,  $J = 8.8$  Hz, 2H), 6.69 (s, 2H), 5.92 (d,  $J = 16.3$  Hz, 1H), 2.59 (t,  $J = 8.6$  Hz, 4H), 1.54 (s, 9H), 1.53 – 1.46 (m, 4H), 1.38 – 1.31 (m, 4H), 0.90 (t,  $J = 7.3$  Hz, 6H).  $^{13}\text{C NMR}$  (100 MHz,  $\text{CDCl}_3$ )  $\delta$  165.9, 156.3, 156.1, 143.5, 141.7, 132.6, 129.3, 125.8, 120.4, 117.1, 115.6, 80.5, 33.5, 33.1, 28.2, 22.5, 13.8. IR (KBr): 2922, 2563, 2313, 1709, 1474 1282, 1152, 754  $\text{cm}^{-1}$ . HRMS (ESI)  $m/z$  Calcd for  $\text{C}_{27}\text{H}_{36}\text{BrO}_3$   $[\text{M}+\text{H}]^+$  487.1842, found 487.1832.

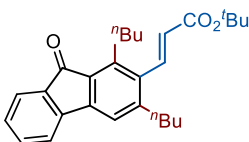

***tert*-Butyl (*E*)-3-(1,3-dibutyl-9-oxo-9H-fluoren-2-yl) acrylate (4aj)**

White solid (49.4 mg, 59% yield). PE:EA = 30:1,  $R_f = 0.3$ ,  $^1\text{H NMR}$  (400 MHz,  $\text{CDCl}_3$ )  $\delta$  7.70 (d,  $J = 16.3$  Hz, 1H), 7.60 (d,  $J = 7.2$  Hz, 1H), 7.50 (t,  $J = 7.5$  Hz, 1H), 7.45 (t,  $J = 7.2$  Hz, 1H), 7.29 (d,  $J = 7.2$  Hz, 1H), 7.24 (s, 1H), 5.94 (d,  $J = 16.3$  Hz, 1H), 3.05 (t,  $J = 7.5$  Hz, 2H), 2.65 (t,  $J = 8.0$  Hz, 2H), 1.55 (s, 9H), 1.53 – 1.45 (m, 4H), 1.45 – 1.34 (m, 4H), 0.94 (t,  $J = 7.2$  Hz, 6H).  $^{13}\text{C NMR}$

(100 MHz, CDCl<sub>3</sub>) δ 194.3, 165.4, 148.2, 144.6, 143.5, 143.3, 141.3, 136.0, 134.9, 134.2, 129.0, 128.6, 126.9, 123.8, 119.9, 119.1, 80.8, 34.3, 32.9, 32.6, 28.2, 27.9, 22.9, 22.6, 13.9, 13.8. IR (KBr): 2953, 2638, 2380, 2313, 1706, 1639, 1517, 1161, 805 cm<sup>-1</sup>. HRMS (ESI) m/z Calcd for C<sub>28</sub>H<sub>35</sub>O<sub>3</sub> [M+H]<sup>+</sup> 419.2581, found 419.2574.

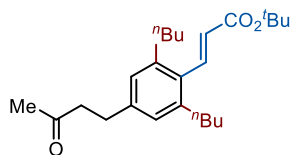

**tert-Butyl (*E*)-3-(2,6-dibutyl-4-(3-oxobutyl)phenyl) acrylate(4ak)**

Yellow solid (43.3 mg, 56% yield). PE:EA = 30:1, R<sub>f</sub> = 0.35, <sup>1</sup>H NMR (400 MHz, CDCl<sub>3</sub>) δ 7.78 (d, *J* = 16.3 Hz, 1H), 6.94 (s, 2H), 5.95 (d, *J* = 16.3 Hz, 1H), 4.30 (t, *J* = 7.1 Hz, 2H), 2.91 (t, *J* = 7.1 Hz, 2H), 2.63 (t, *J* = 8.2 Hz, 4H), 2.09 (s, 3H), 1.58 (s, 9H), 1.57 – 1.50 (m, 4H), 1.43 – 1.36 (m, 4H), 0.96 (t, *J* = 7.3 Hz, 6H). <sup>13</sup>C NMR (100 MHz, CDCl<sub>3</sub>) δ 171.0, 165.9, 142.3, 141.3, 137.6 (m, 4H), 0.96 (t, *J* = 7.3 Hz, 6H). IR (KBr): 2981, 2546, 2313, 1742, 1634, 1518, 1021, 786 cm<sup>-1</sup>. HRMS (ESI) m/z Calcd for C<sub>25</sub>H<sub>39</sub>O<sub>3</sub> [M+H]<sup>+</sup> 387.2894, found 387.2892.

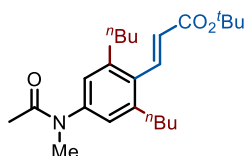

**tert-Butyl (*E*)-3-(2,6-dibutyl-4-(*N*-methylacetamido)phenyl) acrylate(4al)**

White solid (51.9 mg, 67% yield). PE:EA = 20:1, R<sub>f</sub> = 0.3, <sup>1</sup>H NMR (400 MHz, CDCl<sub>3</sub>) δ 7.69 (d, *J* = 16.3 Hz, 1H), 6.85 (s, 2H), 5.92 (d, *J* = 16.3 Hz, 1H), 3.23 (s, 3H), 2.59 (t, *J* = 7.9 Hz, 4H), 1.87 (s, 3H), 1.52 (s, 9H), 1.51 – 1.46 (m, 4H), 1.37 – 1.30 (m, 4H), 0.90 (t, *J* = 7.3 Hz, 6H). <sup>13</sup>C NMR (100 MHz, CDCl<sub>3</sub>) δ 170.4, 165.5, 143.9, 142.8, 141.3, 133.4, 126.6, 125.0, 37.0, 33.3, 33.0, 28.1, 22.4, 13.8. IR (KBr): 2896, 2745, 2553, 2013, 1752, 1638, 1329, 1052, 784 cm<sup>-1</sup>. HRMS (ESI) m/z Calcd for C<sub>24</sub>H<sub>38</sub>NO<sub>3</sub> [M+H]<sup>+</sup> 388.2846, found 388.2853.

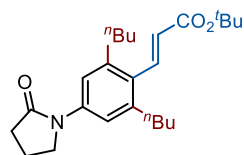

**tert-Butyl (*E*)-3-(2,6-dibutyl-4-(2-oxopyrrolidin-1-yl)phenyl) acrylate(4am)**

Yellow solid (66.3 mg, 83% yield). PE:EA = 20:1, R<sub>f</sub> = 0.3, <sup>1</sup>H NMR (400 MHz, CDCl<sub>3</sub>) δ 7.73 (d, *J* = 16.3 Hz, 1H), 7.31 (s, 2H), 5.90 (d, *J* = 16.3 Hz, 1H), 3.85 (t, *J* = 7.0 Hz, 2H), 2.63 (t, *J* = 7.1 Hz, 4H),

2.59 (t,  $J = 8.2$  Hz, 2H), 2.19 – 2.12 (m, 2H), 1.53 (s, 9H), 1.53 – 1.47 (m, 4H), 1.39 – 1.32 (m, 4H), 0.91 (t,  $J = 7.3$  Hz, 6H).  $^{13}\text{C}$  NMR (100 MHz,  $\text{CDCl}_3$ )  $\delta$  174.3, 166.0, 142.2, 142.0, 139.0, 130.1, 125.7, 118.5, 80.5, 48.8, 33.8, 33.4, 32.9, 28.3, 22.6, 18.1, 13.9. IR (KBr): 2857, 2579, 2312, 1963, 1704, 1467 1151, 752  $\text{cm}^{-1}$ . HRMS (ESI)  $m/z$  Calcd for  $\text{C}_{25}\text{H}_{38}\text{NO}_3$   $[\text{M}+\text{H}]^+$  400.2846, found 400.2843.

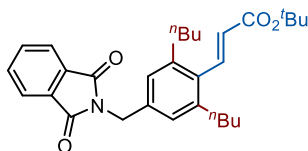

***tert*-Butyl (*E*)-3-(2,6-dibutyl-4-((1,3-dioxisoindolin-2-yl)methyl) phenyl)acrylate (4an)**

White solid (78.0 mg, 82% yield). PE:EA = 30:1,  $R_f = 0.4$ ,  $^1\text{H}$  NMR (400 MHz,  $\text{CDCl}_3$ )  $\delta$  7.86 (d,  $J = 3.1$  Hz, 1H), 7.85 (d,  $J = 3.1$  Hz, 1H), 7.72 (t,  $J = 2.9$  Hz, 2H), 7.69 (d,  $J = 4.6$  Hz, 1H), 7.12 (s, 2H), 5.88 (d,  $J = 16.3$  Hz, 1H), 4.78 (s, 2H), 2.57 (t,  $J = 3.2$  Hz, 4H), 1.53 (s, 9H), 1.52 – 1.45 (m, 4H), 1.37 – 1.30 (m, 4H), 0.90 (t,  $J = 7.3$  Hz, 6H).  $^{13}\text{C}$  NMR (101 MHz,  $\text{CDCl}_3$ )  $\delta$  168.02, 165.75, 142.13, 141.61, 135.83, 133.93, 133.52, 132.16, 127.19, 126.01, 123.32, 80.47, 41.43, 33.41, 33.20, 28.18, 22.56, 13.80. IR (KBr): 2982, 2675, 2432, 2313, 1705, 1640, 1517, 756  $\text{cm}^{-1}$ . HRMS (ESI)  $m/z$  Calcd for  $\text{C}_{30}\text{H}_{38}\text{NO}_4$   $[\text{M}+\text{H}]^+$  476.2795, found 476.2799.

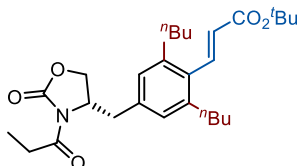

***tert*-Butyl (*S, E*)-3-(2,6-dibutyl-4-((2-oxo-3-propionyloxazolidin-4-yl)methyl)phenyl)acrylate (4ao)**

White solid (66.9 mg, 70% yield). PE:EA = 20:1,  $R_f = 0.2$ ,  $^1\text{H}$  NMR (400 MHz,  $\text{CDCl}_3$ )  $\delta$  7.71 (d,  $J = 16.3$  Hz, 1H), 6.89 (s, 2H), 5.90 (d,  $J = 16.4$  Hz, 1H), 4.65 (t,  $J = 8.5$  Hz, 1H), 4.24 – 4.14 (m, 2H), 3.24 (d,  $J = 10.1$  Hz, 1H), 2.96 (t,  $J = 7.5$  Hz, 2H), 2.69 (t,  $J = 8.0$  Hz, 1H), 2.58 (t,  $J = 7.2$  Hz, 4H), 1.52 – 1.44 (m, 4H), 1.37 – 1.31 (m, 4H), 1.21 (t,  $J = 7.3$  Hz, 3H), 0.92 (t,  $J = 7.3$  Hz, 6H).  $^{13}\text{C}$  NMR (100 MHz,  $\text{CDCl}_3$ )  $\delta$  174.1, 165.7, 153.5, 141.9, 141.9, 134.8, 133.0, 128.0, 126.1, 80.6, 66.3, 55.2, 37.6, 33.4, 33.3, 29.2, 28.2, 22.6, 13.9, 8.3. IR (KBr): 2947, 2312, 2138, 1785, 1633, 1426, 1025, 751  $\text{cm}^{-1}$ . HRMS (ESI)  $m/z$  Calcd for  $\text{C}_{28}\text{H}_{41}\text{NO}_5\text{Na}$   $[\text{M}+\text{Na}]^+$  494.3057, found 494.3046.



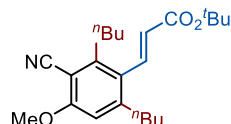

***tert*-Butyl (*E*)-3-(2,6-dibutyl-3-cyano-4-methoxyphenyl) acrylate (4ap)**

White solid (62.4 mg, 84% yield). PE:EA = 20:1,  $R_f = 0.3$ ,  $^1\text{H NMR}$  (400 MHz,  $\text{CDCl}_3$ )  $\delta$  7.60 (d,  $J = 16.3$  Hz, 1H), 6.65 (s, 1H), 5.88 (d,  $J = 16.3$  Hz, 1H), 3.90 (s, 3H), 2.82 – 2.75 (m, 2H), 2.65 – 2.59 (m, 2H), 1.52 (s, 9H), 1.49 (dd,  $J = 8.8, 6.6$  Hz, 4H), 1.43 – 1.33 (m, 4H), 0.92 (t,  $J = 6.5$  Hz, 6H).  $^{13}\text{C NMR}$  (100 MHz,  $\text{CDCl}_3$ )  $\delta$  165.3, 160.9, 148.2, 146.9, 140.3, 127.2, 126.9, 115.8, 109.5, 100.3, 80.8, 55.9, 34.3, 32.9, 32.5, 32.2, 28.1, 22.6, 22.5, 13.8, 13.6. IR (KBr): 2988, 2865, 2313, 1956, 1706, 1517, 1203, 756  $\text{cm}^{-1}$ . HRMS (ESI)  $m/z$  Calcd for  $\text{C}_{23}\text{H}_{34}\text{NO}_3$   $[\text{M}+\text{H}]^+$  372.2533, found 372.2530.

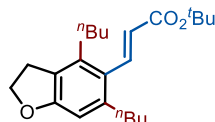

***tert*-Butyl (*E*)-3-(5,7-dibutyl-2,3-dihydrobenzofuran-6-yl) acrylate (4aq)**

White oil (33.7 mg, 47% yield). PE:EA = 40:1,  $R_f = 0.5$ ,  $^1\text{H NMR}$  (400 MHz,  $\text{CDCl}_3$ )  $\delta$  7.74 (d,  $J = 16.3$  Hz, 1H), 6.54 (s, 1H), 5.88 (d,  $J = 16.3$  Hz, 1H), 4.57 (t,  $J = 8.6$  Hz, 2H), 3.14 (t,  $J = 8.6$  Hz, 2H), 2.62 – 2.53 (m, 4H), 1.53 (s, 9H), 1.52 – 1.43 (m, 4H), 1.40 – 1.32 (m, 4H), 0.92 (q,  $J = 7.2$  Hz, 6H).  $^{13}\text{C NMR}$  (100 MHz,  $\text{CDCl}_3$ )  $\delta$  166.3, 159.7, 142.5, 142.5, 138.4, 125.8, 124.4, 123.8, 108.0, 80.2, 71.2, 33.9, 33.4, 31.8, 31.1, 28.7, 28.2, 22.8, 22.5, 13.9, 13.8. IR (KBr): 2964, 2743, 2313, 1962, 1740, 1516, 1149, 795  $\text{cm}^{-1}$ . HRMS (ESI)  $m/z$  Calcd for  $\text{C}_{23}\text{H}_{35}\text{O}_3$   $[\text{M}+\text{H}]^+$  359.2581, found 359.2574.

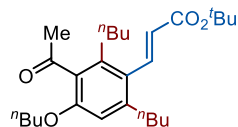

***tert*-Butyl (*E*)-3-(3-acetyl-4-butoxy-2,6-dibutylphenyl) acrylate (4ar)**

White solid (55.9 mg, 65% yield). PE:EA = 20:1,  $R_f = 0.4$ ,  $^1\text{H NMR}$  (400 MHz,  $\text{CDCl}_3$ )  $\delta$  7.67 (d,  $J = 16.2$  Hz, 1H), 6.60 (s, 1H), 5.87 (d,  $J = 16.3$  Hz, 1H), 3.96 (t,  $J = 6.4$  Hz, 2H), 2.59 (t,  $J = 6.2$  Hz, 2H), 2.49 (s, 3H), 2.45 (t,  $J = 8.3$  Hz, 2H), 1.77 – 1.70 (m, 2H), 1.52 (s, 9H), 1.50 – 1.42 (m, 4H), 1.36 – 1.29 (m, 4H), 0.96 (t,  $J = 7.4$  Hz, 3H), 0.91 (t,  $J = 7.4$  Hz, 3H), 0.87 (t,  $J = 7.2$  Hz, 3H).  $^{13}\text{C NMR}$  (100 MHz,  $\text{CDCl}_3$ )  $\delta$  205.8, 165.8, 155.0, 143.4, 141.9, 138.7, 129.7, 127.0, 125.9, 110.2,

80.4, 67.9, 33.9, 33.3, 33.3, 32.6, 31.2, 30.3, 28.2, 22.8, 22.5, 19.3, 13.8, 13.8, 13.6. IR (KBr): 2955, 2789, 2313, 2108, 1706, 1518, 1147, 751  $\text{cm}^{-1}$ . HRMS (ESI)  $m/z$  Calcd for  $\text{C}_{27}\text{H}_{43}\text{O}_4$   $[\text{M}+\text{H}]^+$  431.3156, found 431.3150.

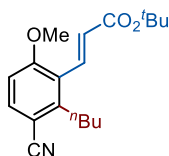

***tert*-Butyl (*E*)-3-(2-butyl-3-cyano-6-methoxyphenyl) acrylate (4aa')**

White solid (50.4 mg, 80% yield). PE:EA = 20:1,  $R_f$  = 0.2,  $^1\text{H}$  NMR (400 MHz,  $\text{CDCl}_3$ )  $\delta$  7.65 (dd,  $J$  = 16.1 Hz, 1H), 7.55 (d,  $J$  = 8.7 Hz, 1H), 6.83 (d,  $J$  = 8.7 Hz, 1H), 6.53 (d,  $J$  = 16.1 Hz, 1H), 3.91 (s, 3H), 2.94 (t,  $J$  = 8.6 Hz, 2H), 1.62 – 1.55 (m, 2H), 1.53 (s, 9H), 1.50 – 1.41 (m, 2H), 0.95 (t,  $J$  = 7.3 Hz, 3H).  $^{13}\text{C}$  NMR (100 MHz,  $\text{CDCl}_3$ )  $\delta$  166.5, 161.7, 148.1, 135.4, 134.6, 126.6, 123.4, 118.5, 109.2, 105.6, 80.6, 55.9, 32.9, 32.0, 28.2, 22.6, 13.7. IR (KBr): 2954, 2744, 2452, 2313, 1762, 1640, 1516, 755  $\text{cm}^{-1}$ . HRMS (ESI)  $m/z$  Calcd for  $\text{C}_{19}\text{H}_{26}\text{NO}_3$   $[\text{M}+\text{H}]^+$  316.1907, found 316.1913.

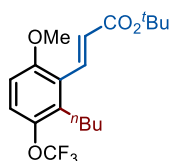

***tert*-Butyl (*E*)-3-(2-butyl-6-methoxy-3-(trifluoromethoxy)phenyl) acrylate (4ab')**

White solid (41.1 mg, 55% yield). PE:EA = 30:1,  $R_f$  = 0.4,  $^1\text{H}$  NMR (400 MHz,  $\text{CDCl}_3$ )  $\delta$  7.70 (d,  $J$  = 16.1 Hz, 1H), 7.17 (d,  $J$  = 10.9 Hz, 1H), 6.76 (d,  $J$  = 9.1 Hz, 1H), 6.60 (d,  $J$  = 16.1 Hz, 1H), 3.86 (s, 3H), 2.77 (t,  $J$  = 10.9 Hz, 2H), 1.54 (s, 9H), 1.52 – 1.47 (m, 2H), 1.45 – 1.39 (m, 2H), 0.94 (t,  $J$  = 7.1 Hz, 3H).  $^{13}\text{C}$  NMR (100 MHz,  $\text{CDCl}_3$ )  $\delta$  166.9, 157.1, 141.4, 137.1, 136.4, 125.9, 123.5, 124.5 (q,  $J$  = 5.1 Hz), 121.7, 108.8, 80.3, 55.7, 32.3, 28.2, 26.5, 22.7, 13.7. IR (KBr): 2981, 2765, 2382, 2213, 1780, 1672, 1406, 765  $\text{cm}^{-1}$ . HRMS (ESI)  $m/z$  Calcd for  $\text{C}_{19}\text{H}_{26}\text{F}_3\text{O}_4$   $[\text{M}+\text{H}]^+$  375.1778, found 375.1772.

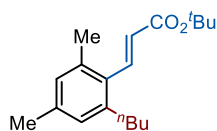

***tert*-Butyl (*E*)-3-(2-butyl-4,6-dimethylphenyl) acrylate (4ac')**

White solid (38.6 mg, 67% yield). PE:EA = 40:1,  $R_f$  = 0.5,  $^1\text{H}$  NMR (400 MHz,  $\text{CDCl}_3$ )  $\delta$  7.76 (d,  $J$  = 16.3 Hz, 1H), 6.88 (s, 2H), 5.95 (d,  $J$  = 16.5 Hz, 1H), 2.61 (t,  $J$  = 8.3 Hz, 2H), 2.32 (s, 3H), 2.29 (s, 3H), 1.54 (s, 9H), 1.53 – 1.48 (m, 2H), 1.40 – 1.34 (m, 2H), 0.93 (t,  $J$  = 7.3 Hz, 3H).  $^{13}\text{C}$

NMR (100 MHz, CDCl<sub>3</sub>)  $\delta$  166.3, 142.2, 141.7, 137.8, 136.4, 130.8, 129.1, 127.9, 125.1, 80.4, 33.5, 33.4, 28.2, 22.6, 21.3, 21.1, 13.9. IR (KBr): 2924, 2738, 2430, 2313, 1709, 1517, 1306, 1151 cm<sup>-1</sup>. HRMS (ESI)  $m/z$  Calcd for C<sub>19</sub>H<sub>29</sub>O<sub>2</sub> [M+H]<sup>+</sup> 289.2162, found 289.2157.

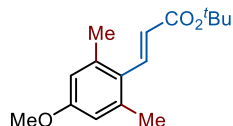

***tert*-Butyl (*E*)-3-(4-methoxy-2,6-dimethylphenyl) acrylate (4ba)**

White solid (28.9 mg, 55% yield). PE:EA = 40:1, R<sub>f</sub> = 0.5, <sup>1</sup>H NMR (400 MHz, CDCl<sub>3</sub>)  $\delta$  7.74 (d,  $J$  = 16.3 Hz, 1H), 6.61 (s, 2H), 5.96 (d,  $J$  = 16.3 Hz, 1H), 3.79 (s, 3H), 2.36 (s, 6H), 1.54 (s, 9H). <sup>13</sup>C NMR (100 MHz, CDCl<sub>3</sub>)  $\delta$  166.6, 159.1, 141.5, 139.0, 126.4, 123.8, 113.7, 80.3, 55.1, 28.2, 21.7. IR (KBr): 2974, 2769, 2313, 1706, 1517, 1285, 1146, 735 cm<sup>-1</sup>. HRMS (ESI)  $m/z$  Calcd for C<sub>16</sub>H<sub>23</sub>O<sub>3</sub> [M+H]<sup>+</sup> 263.1642, found 263.1639.

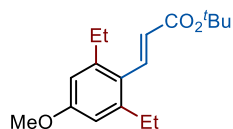

***tert*-Butyl (*E*)-3-(2,6-diethyl-4-methoxyphenyl) acrylate (4bb)**

White solid (37.8 mg, 65% yield). PE:EA = 40:1, R<sub>f</sub> = 0.45, <sup>1</sup>H NMR (400 MHz, CDCl<sub>3</sub>)  $\delta$  7.76 (d,  $J$  = 16.2 Hz, 1H), 6.65 (s, 2H), 5.92 (d,  $J$  = 16.3 Hz, 1H), 3.81 (s, 3H), 2.67 (q,  $J$  = 7.5 Hz, 4H), 1.54 (s, 9H), 1.20 (t,  $J$  = 7.5 Hz, 6H). <sup>13</sup>C NMR (100 MHz, CDCl<sub>3</sub>)  $\delta$  166.5, 159.7, 144.8, 142.1, 126.1, 124.9, 112.0, 80.6, 55.3, 28.5, 27.4, 15.5. IR (KBr): 2894, 2543, 2213, 1721, 1506, 1205, 1046, 765 cm<sup>-1</sup>. HRMS (ESI)  $m/z$  Calcd for C<sub>18</sub>H<sub>27</sub>O<sub>3</sub> [M+H]<sup>+</sup> 291.1955, found 291.1947.

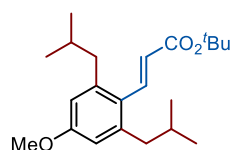

***tert*-Butyl (*E*)-3-(2,6-diisobutyl-4-methoxyphenyl) acrylate (4bc)**

White solid (49.8 mg, 72% yield). PE:EA = 40:1, R<sub>f</sub> = 0.5, <sup>1</sup>H NMR (400 MHz, CDCl<sub>3</sub>)  $\delta$  7.72 (d,  $J$  = 16.3 Hz, 1H), 6.58 (s, 2H), 5.86 (d,  $J$  = 16.3 Hz, 1H), 3.79 (s, 3H), 2.50 (d,  $J$  = 7.1 Hz, 4H), 1.81 (dq,  $J$  = 13.5, 6.7 Hz, 2H), 1.54 (s, 9H), 0.89 (d,  $J$  = 6.6 Hz, 12H). <sup>13</sup>C NMR (100 MHz, CDCl<sub>3</sub>)  $\delta$  166.2, 158.5, 142.8, 141.9, 127.1, 124.9, 113.4, 80.2, 55.0, 43.2, 29.7, 28.2, 22.4. IR (KBr): 2962, 2741, 2448, 2313, 1705, 1516, 1146, 792 cm<sup>-1</sup>. HRMS (ESI)  $m/z$  Calcd for C<sub>22</sub>H<sub>35</sub>O<sub>3</sub> [M+H]<sup>+</sup> 347.2581, found 347.2575.

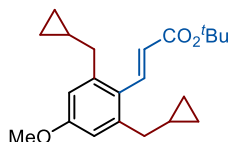

***tert*-Butyl (*E*)-3-(2,6-bis(cyclopropylmethyl)-4-methoxyphenyl) acrylate (4bd)**

White oil (42.5 mg, 62% yield). PE:EA = 40:1,  $R_f = 0.55$ ,  $^1\text{H NMR}$  (400 MHz,  $\text{CDCl}_3$ )  $\delta$  7.74 (d,  $J = 16.2$  Hz, 1H), 6.88 (s, 2H), 5.91 (d,  $J = 16.3$  Hz, 1H), 3.83 (s, 3H), 2.58 (d,  $J = 6.6$  Hz, 4H), 1.54 (s, 9H), 1.00 – 0.92 (m, 2H), 0.55 (q,  $J = 4.8$  Hz, 4H), 0.21 (q,  $J = 4.9$  Hz, 4H).  $^{13}\text{C NMR}$  (100 MHz,  $\text{CDCl}_3$ )  $\delta$  166.3, 159.2, 142.4, 142.2, 126.3, 125.0, 112.3, 80.4, 55.1, 38.3, 28.2, 11.1, 4.9. IR (KBr): 2936, 2456, 2313, 1986, 1721, 1639, 1517, 755  $\text{cm}^{-1}$ . HRMS (ESI)  $m/z$  Calcd for  $\text{C}_{22}\text{H}_{31}\text{O}_3$   $[\text{M}+\text{H}]^+$  343.2268, found 343.2260.

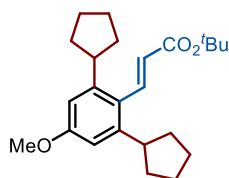

***tert*-Butyl (*E*)-3-(2,6-dicyclopentyl-4-methoxyphenyl) acrylate(4be)**

White solid (42.5 mg, 62% yield). PE:EA = 40:1,  $R_f = 0.5$ ,  $^1\text{H NMR}$  (400 MHz,  $\text{CDCl}_3$ )  $\delta$  7.82 (d,  $J = 16.1$  Hz, 1H), 6.71 (s, 2H), 5.81 (d,  $J = 16.1$  Hz, 1H), 3.81 (s, 3H), 3.15 (p,  $J = 8.0$  Hz, 2H), 1.99 (q,  $J = 8.8$  Hz, 4H), 1.80 (q,  $J = 5.7$  Hz, 4H), 1.69 – 1.62 (m, 4H), 1.61 – 1.55 (m, 4H), 1.55 (s, 9H).  $^{13}\text{C NMR}$  (100 MHz,  $\text{CDCl}_3$ )  $\delta$  166.1, 159.5, 146.3, 143.5, 127.3, 125.7, 108.9, 80.5, 55.0, 42.4, 35.0, 28.3, 25.8. IR (KBr): 2978, 2737, 2313, 1713, 1517, 1325, 756  $\text{cm}^{-1}$ . HRMS (ESI)  $m/z$  Calcd for  $\text{C}_{24}\text{H}_{35}\text{O}_3$   $[\text{M}+\text{H}]^+$  371.2581, found 371.2578.

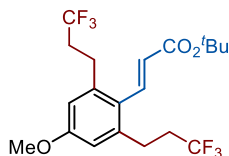

***tert*-Butyl (*E*)-3-(4-methoxy-2,6-bis(3,3,3-trifluoropropyl) phenyl) acrylate (4bf)**

White solid (34.9 mg, 41% yield). PE:EA = 40:1,  $R_f = 0.3$ ,  $^1\text{H NMR}$  (400 MHz,  $\text{CDCl}_3$ )  $\delta$  7.67 (d,  $J = 16.3$  Hz, 1H), 6.66 (s, 2H), 5.92 (d,  $J = 16.3$  Hz, 1H), 3.81 (s, 3H), 2.88 (t,  $J = 8.2$  Hz, 4H), 2.37 – 2.23 (m, 4H), 1.53 (s, 9H).  $^{13}\text{C NMR}$  (100 MHz,  $\text{CDCl}_3$ )  $\delta$  165.2, 159.6, 140.0, 139.4, 126.9, 126.5, 126.5 (q,  $J = 276.9$  Hz), 113.4, 81.0, 55.2, 34.8 (q,  $J = 28.5$  Hz), 28.1, 26.4 (q,  $J = 3.3$  Hz). IR (KBr): 2983, 2313, 1705, 1637, 1248, 1141, 754  $\text{cm}^{-1}$ . HRMS (ESI)  $m/z$  Calcd for  $\text{C}_{20}\text{H}_{25}\text{F}_6\text{O}_3$   $[\text{M}+\text{H}]^+$  427.1702, found 427.1711.

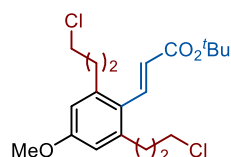

***tert*-Butyl (*E*)-3-(2,6-bis(2-chloroethyl)-4-methoxyphenyl) acrylate (4bg)**

White oil (50.3 mg, 74% yield). PE:EA = 40:1,  $R_f = 0.4$ ,  $^1\text{H NMR}$  (400 MHz,  $\text{CDCl}_3$ )  $\delta$  7.71 (d,  $J = 16.2$  Hz, 1H), 6.66 (s, 2H), 5.91 (d,  $J = 16.2$  Hz, 1H), 3.80 (s, 3H), 3.53 (t,  $J = 6.4$  Hz, 4H), 2.79 (t,  $J = 7.6$  Hz, 4H), 2.05 – 1.97 (m, 4H), 1.53 (s, 9H).  $^{13}\text{C NMR}$  (100 MHz,  $\text{CDCl}_3$ )  $\delta$  165.8, 159.2, 141.2, 126.6, 125.8, 113.2, 80.6, 55.2, 44.3, 33.4, 31.1, 28.2. IR (KBr): 2971, 2742, 2434, 2313, 1706, 1640, 1293, 1147  $\text{cm}^{-1}$ . HRMS (ESI)  $m/z$  Calcd for  $\text{C}_{18}\text{H}_{25}\text{Cl}_2\text{O}_3$   $[\text{M}+\text{H}]^+$  359.1175, found 359.1179.

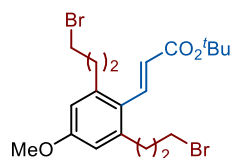

***tert*-Butyl (*E*)-3-(2,6-bis(2-bromoethyl)-4-methoxyphenyl) acrylate (4bh)**

White oil (61.5 mg, 69% yield). PE:EA = 40:1,  $R_f = 0.4$ ,  $^1\text{H NMR}$  (400 MHz,  $\text{CDCl}_3$ )  $\delta$  7.70 (d,  $J = 16.2$  Hz, 1H), 6.66 (s, 2H), 5.91 (d,  $J = 16.3$  Hz, 1H), 3.80 (s, 3H), 3.39 (t,  $J = 6.5$  Hz, 4H), 2.79 (t,  $J = 6.3$  Hz, 4H), 2.13 – 2.04 (m, 4H), 1.53 (s, 9H).  $^{13}\text{C NMR}$  (100 MHz,  $\text{CDCl}_3$ )  $\delta$  165.7, 159.2, 141.2, 141.0, 126.6, 125.9, 113.2, 80.6, 55.2, 33.5, 33.1, 32.3, 28.2. IR (KBr): 2875, 2740, 2384, 2248, 1721, 1641, 1395, 1047, 762  $\text{cm}^{-1}$ . HRMS (ESI)  $m/z$  Calcd for  $\text{C}_{18}\text{H}_{25}\text{Br}_2\text{O}_3$   $[\text{M}+\text{H}]^+$  447.0165, found 447.0168.

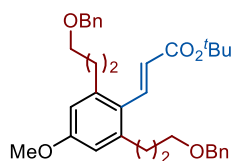

***tert*-Butyl (*E*)-3-(2,6-bis(2-(benzyloxy) ethyl)-4-methoxyphenyl) acrylate (4bi)**

White solid (52.2 mg, 52% yield). PE:EA = 40:1,  $R_f = 0.3$ ,  $^1\text{H NMR}$  (400 MHz,  $\text{CDCl}_3$ )  $\delta$  7.76 (d,  $J = 18.3$  Hz, 1H), 7.34 (s, 8H), 7.29 (t,  $J = 4.1$  Hz, 2H), 6.65 (s, 2H), 5.94 (d,  $J = 16.3$  Hz, 1H), 4.51 (s, 4H), 3.77 (s, 3H), 3.50 (t,  $J = 6.4$  Hz, 4H), 2.75 (t,  $J = 10.0$  Hz, 4H), 1.93 – 1.84 (m, 4H), 1.52 (s, 9H).  $^{13}\text{C NMR}$  (100 MHz,  $\text{CDCl}_3$ )  $\delta$  166.1, 159.1, 142.4, 141.7, 138.5, 128.4, 127.6, 127.5, 126.4, 125.0, 112.8, 80.4, 72.8, 69.6, 55.1, 30.8, 30.6, 28.2. IR (KBr): 2935, 2760, 2448, 2254, 1760, 1541, 1325, 1027, 763  $\text{cm}^{-1}$ . HRMS (ESI)  $m/z$  Calcd for  $\text{C}_{32}\text{H}_{39}\text{O}_5$   $[\text{M}+\text{H}]^+$  503.2792, found 503.2785.

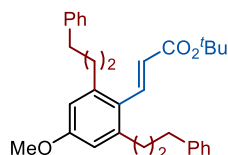

***tert*-Butyl (*E*)-3-(4-methoxy-2,6-diphenethylphenyl) acrylate (4bj)**

White solid (57.5 mg, 65% yield). PE:EA = 40:1,  $R_f = 0.5$ ,  $^1\text{H NMR}$  (400 MHz,  $\text{CDCl}_3$ )  $\delta$  7.74 (d,  $J = 16.2$  Hz, 1H), 7.28 (t,  $J = 7.4$  Hz, 4H), 7.18 (d,  $J = 8.0$  Hz, 6H), 6.61 (s, 2H), 5.88 (d,  $J = 16.6$  Hz, 1H), 3.78 (s, 3H), 2.67 (t,  $J = 10.2$  Hz, 8H), 1.94 – 1.83 (m, 4H), 1.56 (s, 9H).  $^{13}\text{C NMR}$  (100 MHz,  $\text{CDCl}_3$ )  $\delta$  166.0, 159.1, 142.7, 142.1, 141.9, 128.3, 128.3, 126.3, 125.7, 124.9, 112.6, 80.4, 55.1, 35.7, 32.6, 28.3. IR (KBr): 2920, 2735, 2308, 2154, 1754, 1305, 1127, 795  $\text{cm}^{-1}$ . HRMS (ESI)  $m/z$  Calcd for  $\text{C}_{30}\text{H}_{35}\text{O}_3$   $[\text{M}+\text{H}]^+$  443.2581, found 443.2588.

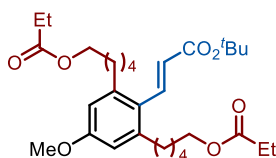

**(*E*)-(2-(3-(tert-butoxy)-3-oxoprop-1-en-1-yl)-5-methoxy-1,3-phenylene) bis(ethane-2,1-diyl) dipropionate (4bk)**

White solid (48.6 mg, 56% yield). PE:EA = 20:1,  $R_f = 0.3$ ,  $^1\text{H NMR}$  (400 MHz,  $\text{CDCl}_3$ )  $\delta$  7.70 (d,  $J = 16.2$  Hz, 1H), 6.59 (s, 2H), 5.86 (d,  $J = 16.3$  Hz, 1H), 4.11 (q,  $J = 16.1$  Hz, 4H), 3.78 (s, 3H), 2.60 (t,  $J = 7.9$  Hz, 4H), 2.28 (t,  $J = 7.5$  Hz, 4H), 1.68 – 1.61 (m, 4H), 1.61 – 1.54 (m, 4H), 1.53 (s, 9H), 1.41 – 1.32 (m, 4H), 1.22 (t,  $J = 7.1$  Hz, 6H).  $^{13}\text{C NMR}$  (100 MHz,  $\text{CDCl}_3$ )  $\delta$  173.7, 166.1, 159.1, 142.8, 141.9, 126.1, 124.8, 112.5, 80.3, 60.1, 55.0, 34.2, 33.9, 30.6, 28.9, 28.2, 24.7, 14.2. IR (KBr): 2855, 2792, 2328, 2144, 1771, 1705, 1541, 1325, 1154, 1027  $\text{cm}^{-1}$ . HRMS (ESI)  $m/z$  Calcd for  $\text{C}_{24}\text{H}_{35}\text{O}_7$   $[\text{M}+\text{H}]^+$  435.2377, found 435.2373.

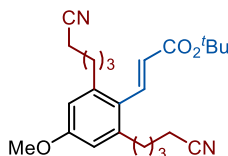

***tert*-Butyl (*E*)-3-(2,6-bis(2-cyanoethyl)-4-methoxyphenyl) acrylate (4bl)**

White solid (45.6 mg, 67% yield). PE:EA = 20:1,  $R_f = 0.3$ ,  $^1\text{H NMR}$  (400 MHz,  $\text{CDCl}_3$ )  $\delta$  7.68 (d,  $J = 16.2$  Hz, 1H), 6.61 (s, 2H), 5.87 (d,  $J = 16.2$  Hz, 1H), 3.79 (s, 3H), 2.66 (t,  $J = 7.0$  Hz, 4H), 2.35 (t,  $J = 8.1$  Hz, 4H), 1.69 (t,  $J = 8.0$  Hz, 8H), 1.53 (s, 9H).  $^{13}\text{C NMR}$  (100 MHz,  $\text{CDCl}_3$ )  $\delta$  165.8, 159.2, 141.6, 141.4, 126.1, 125.5, 119.4, 112.7, 80.7, 55.1, 33.0, 29.7, 28.2, 25.0, 17.0. IR (KBr):

2722, 2658, 2554, 2102, 1698, 1586, 1225, 1147, 780  $\text{cm}^{-1}$ . HRMS (ESI)  $m/z$  Calcd for  $\text{C}_{20}\text{H}_{25}\text{N}_2\text{O}_3$   $[\text{M}+\text{H}]^+$  341.1860, found 341.1856.

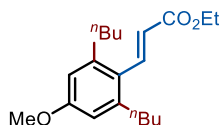

#### **Ethyl (*E*)-3-(2,6-dibutyl-4-methoxyphenyl) acrylate (4ca)**

White solid (47.7 mg, 75% yield). PE:EA = 40:1,  $R_f$  = 0.5,  $^1\text{H}$  NMR (400 MHz,  $\text{CDCl}_3$ )  $\delta$  7.85 (d,  $J$  = 16.3 Hz, 1H), 6.62 (s, 2H), 5.97 (d,  $J$  = 16.3 Hz, 1H), 4.27 (q,  $J$  = 7.1 Hz, 2H), 3.80 (s, 3H), 2.62 (t,  $J$  = 7.8 Hz, 4H), 1.58 – 1.50 (m, 4H), 1.41 – 1.35 (m, 4H), 1.34 (t,  $J$  = 8.2 Hz, 3H), 0.92 (t,  $J$  = 7.3 Hz, 6H).  $^{13}\text{C}$  NMR (100 MHz,  $\text{CDCl}_3$ )  $\delta$  166.9, 159.3, 143.3, 126.1, 122.9, 112.5, 60.4, 55.1, 33.8, 33.3, 22.6, 14.3, 13.9. IR (KBr): 2940, 2866, 2674, 2313, 1716, 1518, 1145, 753  $\text{cm}^{-1}$ . HRMS (ESI)  $m/z$  Calcd for  $\text{C}_{20}\text{H}_{31}\text{O}_3$   $[\text{M}+\text{H}]^+$  319.2268, found 319.2273.

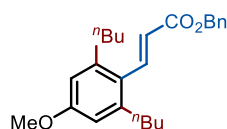

#### **Benzyl (*E*)-3-(2,6-dibutyl-4-methoxyphenyl) acrylate (4cb)**

White solid (50.9 mg, 67% yield). PE:EA = 40:1,  $R_f$  = 0.5,  $^1\text{H}$  NMR (400 MHz,  $\text{CDCl}_3$ )  $\delta$  7.91 (d,  $J$  = 16.3 Hz, 1H), 7.46 – 7.31 (m, 5H), 6.62 (s, 2H), 6.04 (d,  $J$  = 16.1 Hz, 1H), 5.27 (s, 2H), 3.80 (s, 3H), 2.62 (t,  $J$  = 8.2 Hz, 4H), 1.58 – 1.51 (m, 4H), 1.39 – 1.32 (m, 4H), 0.91 (t,  $J$  = 7.3 Hz, 6H).  $^{13}\text{C}$  NMR (100 MHz,  $\text{CDCl}_3$ )  $\delta$  166.7, 159.3, 144.0, 143.4, 136.2, 128.5, 128.1, 128.1, 125.9, 122.4, 112.6, 66.2, 55.1, 33.9, 33.3, 22.6, 13.9. IR (KBr): 2987, 2845, 2613, 2305, 1706, 1565, 1045, 721  $\text{cm}^{-1}$ . HRMS (ESI)  $m/z$  Calcd for  $\text{C}_{32}\text{H}_{39}\text{O}_5$   $[\text{M}+\text{H}]^+$  503.2719, found 503.2712.

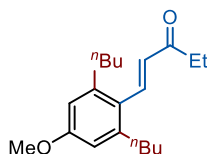

#### **(*E*)-1-(2,6-Dibutyl-4-methoxyphenyl) pent-1-en-3-one (4cc)**

White solid (36.8 mg, 61% yield). PE:EA = 40:1,  $R_f$  = 0.5,  $^1\text{H}$  NMR (400 MHz,  $\text{CDCl}_3$ )  $\delta$  7.73 (d,  $J$  = 16.4 Hz, 1H), 6.62 (s, 2H), 6.28 (d,  $J$  = 16.5 Hz, 1H), 3.80 (s, 3H), 2.68 (q,  $J$  = 7.3 Hz, 2H), 2.64 – 2.58 (m, 4H), 1.57 – 1.49 (m, 4H), 1.39 – 1.33 (m, 4H), 1.18 (t,  $J$  = 7.3 Hz, 3H), 0.91 (t,  $J$  = 7.3 Hz, 6H).  $^{13}\text{C}$  NMR (100 MHz,  $\text{CDCl}_3$ )  $\delta$  200.7, 159.3, 143.3, 141.0, 131.0, 126.2, 112.6, 55.1,

34.0, 33.9, 33.3, 22.6, 13.9, 8.3. IR (KBr): 2744, 2562, 2313, 1802, 1601, 1462 1145, 755  $\text{cm}^{-1}$ . HRMS (ESI)  $m/z$  Calcd for  $\text{C}_{20}\text{H}_{31}\text{O}_3$   $[\text{M}+\text{H}]^+$  319.2268, found 319.22655.

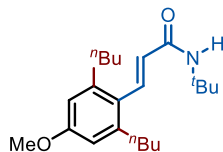

**(E)-N-(tert-Butyl)-3-(2,6-dibutyl-4-methoxyphenyl)acrylamide (4cd)**

White solid (37.9 mg, 55% yield). PE:EA = 20:1,  $R_f$  = 0.2,  $^1\text{H}$  NMR (400 MHz,  $\text{CDCl}_3$ )  $\delta$  7.67 (d,  $J$  = 15.8 Hz, 1H), 6.60 (s, 2H), 5.80 (d,  $J$  = 15.8 Hz, 1H), 5.32 (s, 1H), 3.79 (s, 3H), 2.60 (t,  $J$  = 15.2 Hz, 4H), 1.56 – 1.48 (m, 4H), 1.44 (s, 9H), 1.38 – 1.32 (m, 4H), 0.91 (t,  $J$  = 7.3 Hz, 6H).  $^{13}\text{C}$  NMR (100 MHz,  $\text{CDCl}_3$ )  $\delta$  164.9, 158.8, 142.9, 138.8, 126.8, 112.2, 55.1, 51.4, 33.7, 33.2, 28.9, 22.6, 14.0. IR (KBr): 2960, 2740, 2434, 2313, 1644, 1516, 1102, 785  $\text{cm}^{-1}$ . HRMS (ESI)  $m/z$  Calcd for  $\text{C}_{22}\text{H}_{36}\text{NO}_2$   $[\text{M}+\text{H}]^+$  346.2741, found 346.2750.

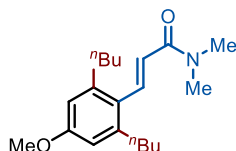

**(E)-3-(2,6-Dibutyl-4-methoxyphenyl)-N,N-dimethylacrylamide (4ce)**

White solid (47.6 mg, 75% yield). PE:EA = 30:1,  $R_f$  = 0.3,  $^1\text{H}$  NMR (400 MHz,  $\text{CDCl}_3$ )  $\delta$  7.77 (d,  $J$  = 15.7 Hz, 1H), 6.62 (s, 2H), 6.40 (d,  $J$  = 15.7 Hz, 1H), 3.80 (s, 3H), 3.10 (s, 3H), 3.08 (s, 3H), 2.61 (t,  $J$  = 7.9 Hz, 4H), 1.58 – 1.50 (m, 4H), 1.39 – 1.32 (m, 4H), 0.90 (t,  $J$  = 7.3 Hz, 6H).  $^{13}\text{C}$  NMR (100 MHz,  $\text{CDCl}_3$ )  $\delta$  166.5, 158.8, 142.9, 140.9, 127.3, 122.4, 112.3, 55.1, 37.2, 35.8, 33.9, 33.4, 22.6, 14.0. IR (KBr): 2740, 2313, 1982, 1650, 1517, 1389, 1135, 755  $\text{cm}^{-1}$ . HRMS (ESI)  $m/z$  Calcd for  $\text{C}_{20}\text{H}_{32}\text{NO}_2$   $[\text{M}+\text{H}]^+$  318.2428, found 318.2436.

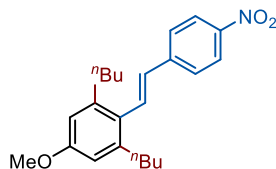

**(E)-1,3-Dibutyl-5-methoxy-2-(4-nitrostyryl)benzene (4cf)**

Yellow solid (50.7 mg, 69% yield). PE:EA = 20:1,  $R_f$  = 0.3,  $^1\text{H}$  NMR (400 MHz,  $\text{CDCl}_3$ )  $\delta$  8.23 (d,  $J$  = 8.8 Hz, 2H), 7.59 (d,  $J$  = 8.9 Hz, 2H), 7.32 (d,  $J$  = 16.5 Hz, 1H), 6.65 (s, 2H), 6.59 (d,  $J$  = 16.5 Hz, 1H), 3.82 (s, 3H), 2.65 (t,  $J$  = 14.8 Hz, 4H), 1.60 – 1.54 (m, 4H), 1.40 – 1.31 (m, 4H), 0.90 (t,  $J$  = 7.3 Hz, 6H).  $^{13}\text{C}$  NMR (100 MHz,  $\text{CDCl}_3$ )  $\delta$  158.7, 146.7, 144.2, 142.8, 131.7, 131.3, 1



27.9, 126.5, 124.2, 112.4, 55.1, 33.9, 33.3, 22.6, 14.0. IR (KBr): 2923, 2657, 2312, 1707, 1598, 1363, 1145, 738  $\text{cm}^{-1}$ . HRMS (ESI)  $m/z$  Calcd for  $\text{C}_{23}\text{H}_{30}\text{NO}_3$   $[\text{M}+\text{H}]^+$  368.2220, found 368.2225.

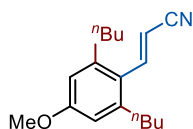

**(E)-3-(2,6-Dibutyl-4-methoxyphenyl) acrylonitrile (4cg)**

White solid (30.4 mg, 61% yield). PE:EA = 30:1,  $R_f$  = 0.4,  $^1\text{H}$  NMR (400 MHz,  $\text{CDCl}_3$ )  $\delta$  7.57 (d,  $J$  = 16.9 Hz, 1H), 7.38 (d,  $J$  = 11.3 Hz, 1H), 6.64 (s, 1H), 6.62 (s, 2H), 5.71 (d,  $J$  = 11.3 Hz, 1H), 5.46 (d,  $J$  = 17.0 Hz, 1H), 3.80 (s, 4H), 2.63 – 2.52 (m, 6H), 1.52 (p,  $J$  = 8.0, 7.4 Hz, 6H), 1.44 – 1.30 (m, 6H), 0.98 – 0.88 (m, 9H).  $^{13}\text{C}$  NMR (100 MHz,  $\text{CDCl}_3$ )  $\delta$  161.5, 159.9, 150.7, 149.8, 143.3, 142.0, 125.0, 118.2, 112.8, 112.2, 103.0, 101.0, 92.9, 55.3, 33.8, 33.6, 33.3, 32.9, 29.7, 22.6, 22.6, 13.9. IR (KBr): 2978, 2309, 1704, 1599, 1268, 1146, 754  $\text{cm}^{-1}$ . HRMS (ESI)  $m/z$  Calcd for  $\text{C}_{18}\text{H}_{26}\text{NO}$   $[\text{M}+\text{H}]^+$  272.2009, found 272.2016.

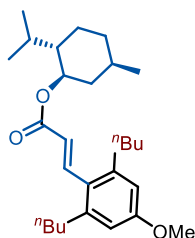

**(1R,2S,5R)-2-Isopropyl-5-methylcyclohexyl (E)-3-(2,6-dibutyl-4-methoxyphenyl) acrylate(4ch)**

White solid (61.2 mg, 72% yield). PE:EA = 40:1,  $R_f$  = 0.3,  $^1\text{H}$  NMR (400 MHz,  $\text{CDCl}_3$ )  $\delta$  7.84 (d,  $J$  = 16.3 Hz, 1H), 6.62 (s, 2H), 5.98 (d,  $J$  = 16.3 Hz, 1H), 4.83 (t,  $J$  = 8.7 Hz, 1H), 3.80 (s, 3H), 2.63 (t,  $J$  = 12.0 Hz, 4H), 2.11 (d,  $J$  = 12.3 Hz, 1H), 1.93 (t,  $J$  = 12.1 Hz, 1H), 1.71 (d,  $J$  = 13.2 Hz, 2H), 1.65 – 1.47 (m, 6H), 1.46 (d,  $J$  = 13.9 Hz, 1H), 1.42 – 1.34 (m, 4H), 1.23 – 0.99 (m, 3H), 0.93 (t,  $J$  = 8.0 Hz, 12H), 0.82 (d,  $J$  = 6.9 Hz, 3H).  $^{13}\text{C}$  NMR (100 MHz,  $\text{CDCl}_3$ )  $\delta$  166.3, 159.2, 143.2, 143.0, 126.1, 123.4, 112.5, 74.1, 55.0, 47.2, 41.0, 34.3, 33.9, 33.3, 31.4, 26.6, 23.8, 22.6, 22.0, 20.6, 16.6, 13.8. IR (KBr): 2998, 2739, 2546, 1705, 1554, 1269, 1046, 774  $\text{cm}^{-1}$ . HRMS (ESI)  $m/z$  Calcd for  $\text{C}_{28}\text{H}_{45}\text{O}_3$   $[\text{M}+\text{H}]^+$  429.3290, found 429.3276.

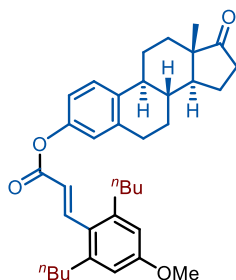

**(8R,9S,13S,14S)-13-Methyl-17-oxo-7,8,9,11,12,13,14,15,16,17-decahydro-6H-cyclopenta[a]phenanthren-3-yl (E)-3-(2,6-dibutyl-4-methoxyphenyl) acrylate(4ci)**

Yellow solid (67.3 mg, 62% yield). PE:EA = 20:1,  $R_f = 0.3$ ,  $^1\text{H NMR}$  (400 MHz,  $\text{CDCl}_3$ )  $\delta$  8.05 (d,  $J = 16.3$  Hz, 1H), 7.32 (d,  $J = 8.4$  Hz, 1H), 6.96 (d,  $J = 8.4$  Hz, 1H), 6.93 (s, 1H), 6.65 (s, 2H), 6.18 (d,  $J = 16.2$  Hz, 1H), 3.82 (s, 3H), 2.94 (t,  $J = 8.2$  Hz, 2H), 2.68 (t,  $J = 8.0$  Hz, 4H), 2.58 – 2.39 (m, 2H), 2.32 (t,  $J = 12.6$  Hz, 1H), 2.21 – 1.97 (m, 4H), 1.65 – 1.59 (m, 4H), 1.58 – 1.47 (m, 6H), 1.43 – 1.37 (m, 4H), 0.95 (t,  $J = 8.4$  Hz, 9H).  $^{13}\text{C NMR}$  (100 MHz,  $\text{CDCl}_3$ )  $\delta$  220.77, 165.58, 159.53, 148.73, 145.21, 143.70, 137.95, 137.25, 126.36, 125.56, 121.65, 121.56, 118.84, 112.70, 55.10, 50.43, 47.94, 44.16, 38.01, 35.84, 33.93, 33.33, 31.54, 29.40, 26.35, 25.76, 22.59, 21.57, 13.92, 13.82. IR (KBr): 2898, 2762, 2446, 2108, 1705, 1657, 1534, 1169, 1004, 762  $\text{cm}^{-1}$ . HRMS (ESI)  $m/z$  Calcd for  $\text{C}_{36}\text{H}_{47}\text{O}_4$   $[\text{M}+\text{H}]^+$  543.3396, found 543.3382.

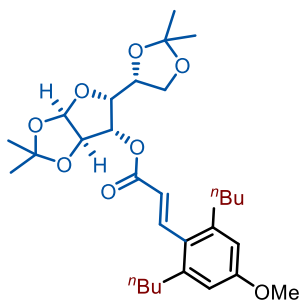

**5-(2,2-Dimethyl-1,3-dioxolan-4-yl)-2,2-dimethyltetrahydrofuro[2,3-d][1,3]dioxol-6-yl (E)-3-(2,6-dibutyl-4-methoxyphenyl)acrylate (4cj)**

White solid (79.6 mg, 58% yield). PE:EA = 20:1,  $R_f = 0.3$ ,  $^1\text{H NMR}$  (400 MHz,  $\text{CDCl}_3$ )  $\delta$  7.91 (d,  $J = 16.2$  Hz, 1H), 6.62 (s, 2H), 5.98 (d,  $J = 16.3$  Hz, 1H), 5.92 (d,  $J = 3.7$  Hz, 1H), 5.41 (s, 1H), 4.60 (d,  $J = 3.7$  Hz, 1H), 4.28 (t,  $J = 4.1$  Hz, 2H), 4.07 (q,  $J = 4.9$  Hz, 2H), 3.80 (s, 3H), 2.62 (t, 4H), 1.58 – 1.49 (m, 7H), 1.42 (s, 3H), 1.40 – 1.33 (m, 4H), 1.32 (s, 3H), 1.30 (s, 3H), 0.92 (t,  $J = 7.3$  Hz, 6H).  $^{13}\text{C NMR}$  (100 MHz,  $\text{CDCl}_3$ )  $\delta$  165.3, 159.5, 144.7, 143.5, 125.4, 121.3, 112.7, 112.2, 109.2, 105.1, 83.4, 79.9, 76.0, 72.5, 67.0, 55.0, 33.9, 33.3, 26.7, 26.7, 26.2, 25.1, 22.5, 13.9. IR (KBr): 2978,

2662, 2346, 2025, 1725, 1637, 1524, 1069, 980, 736  $\text{cm}^{-1}$ . HRMS (ESI)  $m/z$  Calcd for  $\text{C}_{30}\text{H}_{44}\text{O}_8$   $[\text{M}+\text{H}]^+$  533.6740, found 533.6748.

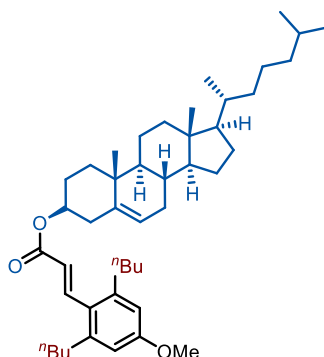

**(3R,8S,9S,10R,13R,14S,17R)-10,13-Dimethyl-17-((R)-6-methylheptan-2-yl)-2,3,4,7,8,9,10,11,12,13,14,15,16,17-tetradecahydro-1H-cyclopenta[a]phenanthren-3-yl (E)-3-(2,6-dibutyl-4-methoxyphenyl) acrylate (4ck)**

White solid (75.1 mg, 57% yield). PE:EA = 20:1,  $R_f$  = 0.4,  $^1\text{H}$  NMR (400 MHz,  $\text{CDCl}_3$ )  $\delta$  7.84 (d,  $J$  = 16.4 Hz, 1H), 6.62 (s, 2H), 5.96 (d,  $J$  = 16.2 Hz, 1H), 5.42 (s, 1H), 4.83 – 4.69 (m, 1H), 3.80 (s, 3H), 2.63 (t,  $J$  = 7.9 Hz, 4H), 2.41 (t,  $J$  = 7.8 Hz, 2H), 2.07 – 1.83 (m, 5H), 1.68 (t,  $J$  = 8.1 Hz, 2H), 1.59 – 1.49 (m, 8H), 1.41 – 1.32 (m, 7H), 1.26 – 1.08 (m, 8H), 1.06 (s, 3H), 1.04 – 0.96 (m, 3H), 0.93 (t,  $J$  = 7.3 Hz, 9H), 0.87 (d,  $J$  = 4.8 Hz, 6H), 0.69 (s, 3H).  $^{13}\text{C}$  NMR (100 MHz,  $\text{CDCl}_3$ )  $\delta$  166.3, 159.2, 143.3, 143.1, 139.7, 126.0, 123.2, 122.6, 112.5, 74.0, 56.7, 56.1, 55.0, 50.0, 42.3, 39.7, 39.5, 38.2, 37.0, 36.6, 36.2, 35.8, 33.8, 33.3, 31.9, 31.9, 28.2, 28.0, 27.9, 24.3, 23.8, 22.8, 22.6, 22.5, 21.0, 19.3, 18.7, 13.9, 11.8. IR (KBr): 2925, 2761, 2658, 1713, 1463, 1273, 1155, 775  $\text{cm}^{-1}$ . HRMS (ESI)  $m/z$  Calcd for  $\text{C}_{45}\text{H}_{71}\text{O}_3$   $[\text{M}+\text{H}]^+$  659.5398, found 659.5384.

**D. Substrate Scope of Electrophilic Amination**

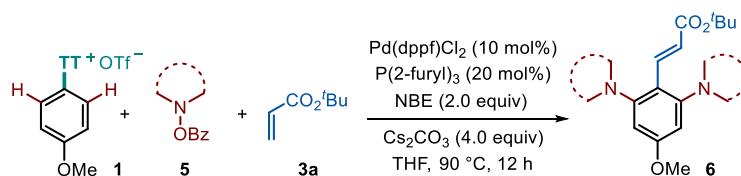

A 15.0 mL vial equipped with a stir bar was charged with  $\text{Pd}(\text{dppf})\text{Cl}_2$  (14.6 mg, 10.0 mol%),  $\text{P}(\text{2-furyl})_3$  (9.3 mg, 20.0 mol%), norbornene (36.0 mg, 2.0 equiv),  $\text{Cs}_2\text{CO}_3$  (260.0 mg, 4.0 equiv), **1** (0.2 mmol), **5** (0.6 mmol), **3a** (0.24 mmol) and THF (2.0 mL) was then added under argon atmosphere. The reaction mixture was stirred at 90 °C for 12 h in an oil bath. After cooling to room temp

erature, the mixture was extracted with ethyl acetate, dried over anhydrous  $\text{MgSO}_4$  and concentrated under reduced pressure. The residue was then chromatographed on silica gel to afford the desired product **6**.

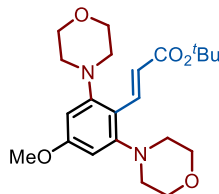

***tert*-Butyl (*E*)-3-(4-methoxy-2,6-dimorpholinophenyl)acrylate (**6a**)**

White oil (58.2 mg, 72% yield). PE:EA = 10:1,  $R_f$  = 0.3,  $^1\text{H}$  NMR (400 MHz,  $\text{CDCl}_3$ )  $\delta$  7.98 (d,  $J$  = 16.4 Hz, 1H), 6.94 (d,  $J$  = 16.4 Hz, 1H), 6.37 (s, 2H), 3.86 (t,  $J$  = 8.0 Hz, 8H), 3.82 (s, 3H), 2.93 (t,  $J$  = 8.1 Hz, 8H), 1.53 (s, 9H).  $^{13}\text{C}$  NMR (100 MHz,  $\text{CDCl}_3$ )  $\delta$  168.0, 161.7, 155.7, 138.3, 119.7, 114.9, 100.4, 79.7, 67.0, 55.2, 52.9, 28.3. IR (KBr): 2927, 2428, 2313, 1707, 1600, 1461, 1145, 745  $\text{cm}^{-1}$ . HRMS (ESI)  $m/z$  Calcd for  $\text{C}_{22}\text{H}_{33}\text{N}_2\text{O}_5$   $[\text{M}+\text{H}]^+$  405.2384, found 405.2380.

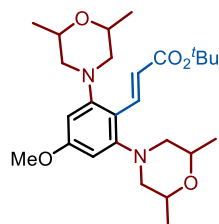

***tert*-Butyl (*E*)-3-(2,6-bis(2,6-dimethylmorpholino)-4-methoxyphenyl)acrylate (**6b**)**

White solid (69.0 mg, 75% yield). PE:EA = 10:1,  $R_f$  = 0.35,  $^1\text{H}$  NMR (400 MHz,  $\text{CDCl}_3$ )  $\delta$  7.94 (d,  $J$  = 16.4 Hz, 1H), 6.86 (d,  $J$  = 16.3 Hz, 1H), 6.32 (s, 2H), 3.90 (d,  $J$  = 16.4 Hz, 4H), 3.81 (s, 3H), 2.99 (d,  $J$  = 11.4 Hz, 4H), 2.40 (t,  $J$  = 10.8 Hz, 4H), 1.52 (s, 9H), 1.19 (d,  $J$  = 6.2 Hz, 12H).  $^{13}\text{C}$  NMR (100 MHz,  $\text{CDCl}_3$ )  $\delta$  168.0, 161.7, 155.4, 138.5, 119.5, 100.3, 79.6, 71.8, 59.1, 55.7, 28.3, 19.6. IR (KBr): 2928, 2897, 2223, 1707, 1548, 1261 1045, 755  $\text{cm}^{-1}$ . HRMS (ESI)  $m/z$  Calcd for  $\text{C}_{26}\text{H}_{41}\text{N}_2\text{O}_5$   $[\text{M}+\text{H}]^+$  461.3010, found 461.3005.

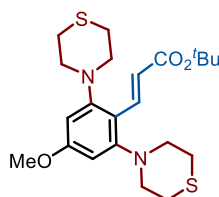

***tert*-Butyl (*E*)-3-(4-methoxy-2,6-dithiomorpholinophenyl)acrylate (**6c**)**

White solid (56.2 mg, 61% yield). PE:EA = 10:1,  $R_f = 0.3$ ,  $^1\text{H NMR}$  (400 MHz,  $\text{CDCl}_3$ )  $\delta$  7.9 0 (d,  $J = 16.4$  Hz, 1H), 6.88 (d,  $J = 16.4$  Hz, 1H), 6.38 (s, 2H), 3.81 (s, 3H), 3.15 (t,  $J = 16.4$  Hz, 8 H), 2.80 (t,  $J = 8.1$  Hz, 8H), 1.55 (s, 9H).  $^{13}\text{C NMR}$  (100 MHz,  $\text{CDCl}_3$ )  $\delta$  167.9, 161.4, 156.5, 138.3, 120.6, 116.1, 101.7, 79.8, 55.2, 55.1, 28.4, 28.1. IR (KBr): 2928, 2827, 2123, 1715, 1584, 1321, 1125, 768  $\text{cm}^{-1}$ . HRMS (ESI)  $m/z$  Calcd for  $\text{C}_{22}\text{H}_{33}\text{N}_2\text{O}_3\text{S}_2$   $[\text{M}+\text{H}]^+$  437.1927, found 437.1924.

### E. Substrate Scope of Electrophilic Deuterated-Methylation

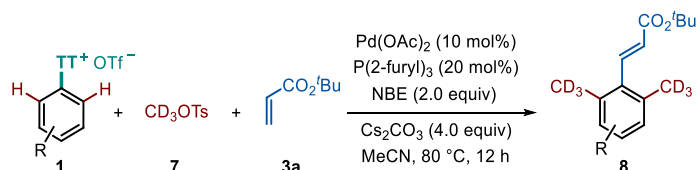

A 15.0 mL vial equipped with a stir bar was charged with  $\text{Pd}(\text{OAc})_2$  (3.6 mg, 10.0 mol%),  $\text{P}(2\text{-furyl})_3$  (9.3 mg, 20.0 mol%), norbornene (36.0 mg, 2.0 equiv),  $\text{Cs}_2\text{CO}_3$  (260.0 mg, 4.0 equiv), **1** (0.2 mmol), **7** (0.6 mmol), **3a** (0.24 mmol) and MeCN (2.0 mL) was then added under argon atmosphere. The reaction mixture was stirred at 80 °C for 12 h in an oil bath. After cooling to room temperature, the mixture was extracted with ethyl acetate, dried over anhydrous  $\text{MgSO}_4$  and concentrated under reduced pressure. The residue was then chromatographed on silica gel to afford the desired product **8**.

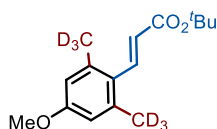

#### *tert*-Butyl (*E*)-3-(4-methoxy-2,6-bis(methyl-d3)phenyl)acrylate (**8a**)

White solid (38.6 mg, 72% yield). PE:EA = 40:1,  $R_f = 0.5$ ,  $^1\text{H NMR}$  (400 MHz,  $\text{CDCl}_3$ )  $\delta$  7.7 4 (d,  $J = 16.2$  Hz, 1H), 6.61 (s, 2H), 5.96 (d,  $J = 16.3$  Hz, 1H), 3.79 (s, 3H), 1.54 (s, 9H).  $^{13}\text{C NMR}$  (100 MHz,  $\text{CDCl}_3$ )  $\delta$  166.6, 159.1, 141.5, 138.9, 123.8, 113.8, 80.3, 55.1, 28.2. IR (KBr): 2875, 2722, 2413, 1702, 1507, 1245, 1126, 765  $\text{cm}^{-1}$ . HRMS (ESI)  $m/z$  Calcd for  $\text{C}_{16}\text{H}_{16}\text{D}_6\text{O}_3$   $[\text{M}+\text{H}]^+$  268.1940, found 268.1946.

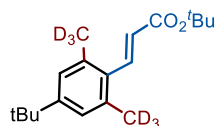

***tert*-Butyl (*E*)-3-(4-(*tert*-butyl)-2,6-bis(methyl-d3)phenyl)acrylate (**8b**)**

White solid (39.4 mg, 67% yield). PE:EA = 40:1,  $R_f = 0.5$ ,  $^1\text{H NMR}$  (400 MHz,  $\text{CDCl}_3$ )  $\delta$  7.7 5 (d,  $J = 16.3$  Hz, 1H), 7.08 (s, 2H), 5.99 (d,  $J = 16.4$  Hz, 1H), 1.54 (s, 9H), 1.31 (s, 9H).  $^{13}\text{C NMR}$  (100 MHz,  $\text{CDCl}_3$ )  $\delta$  166.4, 151.2, 142.0, 136.4, 125.3, 124.9, 80.4, 34.4, 31.2, 28.2. IR (KBr): 28 64, 2645, 2503, 1745, 1467, 1245, 1095, 735  $\text{cm}^{-1}$ . HRMS (ESI)  $m/z$  Calcd for  $\text{C}_{19}\text{H}_{22}\text{D}_6\text{O}_2$   $[\text{M}+\text{H}]^+$  + 294.2460, found 294.2454.

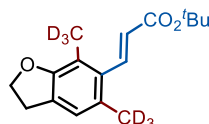

***tert*-Butyl (*E*)-3-(5,7-bis(methyl-d3)-2,3-dihydrobenzofuran-6-yl)acrylate (**8c**)**

White solid (35.3 mg, 63% yield). PE:EA = 40:1,  $R_f = 0.5$ ,  $^1\text{H NMR}$  (400 MHz,  $\text{CDCl}_3$ )  $\delta$  7.7 4 (d,  $J = 16.3$  Hz, 1H), 6.53 (s, 1H), 5.92 (d,  $J = 16.3$  Hz, 1H), 4.57 (t,  $J = 8.7$  Hz, 2H), 3.12 (t,  $J = 8.7$  Hz, 2H), 1.54 (s, 9H).  $^{13}\text{C NMR}$  (100 MHz,  $\text{CDCl}_3$ )  $\delta$  166.6, 159.6, 141.9, 138.0, 133.7, 126.2, 124.6, 123.5, 109.1, 80.2, 71.3, 29.0, 28.2. IR (KBr): 2785, 2765, 2543, 1705, 1325, 1198, 1022, 7 55  $\text{cm}^{-1}$ . HRMS (ESI)  $m/z$  Calcd for  $\text{C}_{17}\text{H}_{17}\text{D}_6\text{O}_3$   $[\text{M}+\text{H}]^+$  281.2018, found 282.2013.

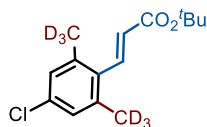

***tert*-Butyl (*E*)-3-(4-chloro-2,6-bis(methyl-d3)phenyl)acrylate (**8d**)**

White solid (29.9 mg, 55% yield). PE:EA = 40:1,  $R_f = 0.5$ ,  $^1\text{H NMR}$  (400 MHz,  $\text{CDCl}_3$ )  $\delta$  7.6 5 (d,  $J = 16.3$  Hz, 1H), 7.05 (s, 2H), 5.96 (d,  $J = 16.4$  Hz, 1H), 1.54 (s, 9H).  $^{13}\text{C NMR}$  (100 MHz,  $\text{CDCl}_3$ )  $\delta$  165.9, 140.9, 138.4, 133.4, 132.6, 128.0, 126.1, 80.7, 28.2. IR (KBr): 2964, 2706, 2535, 1705, 1432, 1245, 735  $\text{cm}^{-1}$ . HRMS (ESI)  $m/z$  Calcd for  $\text{C}_{15}\text{H}_{13}\text{D}_6\text{ClO}_2$   $[\text{M}+\text{H}]^+$  272.1445, found 272.1440.

**F. Behavior of Two-Component Catellani Reaction**

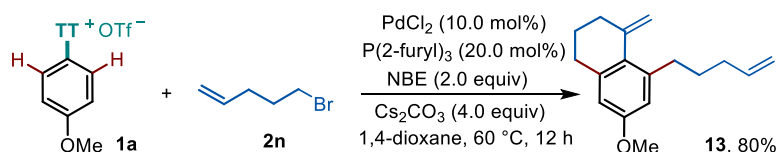

A 15.0 mL vial equipped with a stir bar was charged with PdCl<sub>2</sub> (3.6 mg, 10.0 mol%), P(2-furyl)<sub>3</sub> (9.3 mg, 20.0 mol%), norbornene (36.0 mg, 2.0 equiv), Cs<sub>2</sub>CO<sub>3</sub> (260.0 mg, 4.0 equiv), **1a** (95.0 mg, 0.2 mmol), **2n** (88.8 mg, 0.6 mmol) and 1,4-dioxane (2.0 mL) was then added under argon atmosphere. The reaction mixture was stirred at 60 °C for 12 h in an oil bath. After cooling to room temperature, the mixture was extracted with ethyl acetate, dried over anhydrous MgSO<sub>4</sub> and concentrated under reduced pressure. The residue was then chromatographed on silica gel to afford the desired product **13**. White solid (38.7 mg, 80% yield). PE:EA = 40:1, R<sub>f</sub> = 0.5, <sup>1</sup>H NMR (400 MHz, CDCl<sub>3</sub>) δ 6.66 (s, 1H), 6.53 (s, 1H), 5.91 – 5.81 (m, 1H), 5.15 (s, 1H), 5.06 – 4.95 (m, 3H), 3.79 (s, 3H), 2.81 (t, *J* = 8.0 Hz, 2H), 2.68 (t, *J* = 8.0 Hz, 2H), 2.44 (t, *J* = 8.0 Hz, 2H), 2.12 (t, *J* = 6.4 Hz, 2H), 1.84 (t, *J* = 12.0 Hz, 2H), 1.71 (t, *J* = 6.3 Hz, 2H). <sup>13</sup>C NMR (100 MHz, CDCl<sub>3</sub>) δ 158.0, 143.2, 141.3, 140.9, 138.7, 130.0, 114.7, 113.4, 112.2, 110.6, 55.2, 33.8, 33.6, 32.9, 31.0, 30.5, 23.3. IR (KBr): 2964, 2706, 2535, 1432, 1245, 1152, 956, 735 cm<sup>-1</sup>. HRMS (ESI) *m/z* Calcd for C<sub>17</sub>H<sub>23</sub>O [M+H]<sup>+</sup> 243.1671, found 243.1678.

### G. Substrate Scope of Terminating Reagents

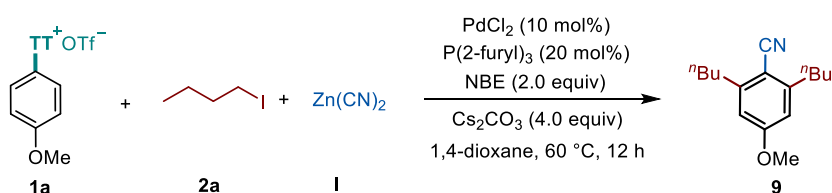

A 15.0 mL vial equipped with a stir bar was charged with PdCl<sub>2</sub> (3.6 mg, 10.0 mol%), P(2-furyl)<sub>3</sub> (9.3 mg, 20.0 mol%), norbornene (36.0 mg, 2.0 equiv), Cs<sub>2</sub>CO<sub>3</sub> (260.0 mg, 4.0 equiv), **1a** (95.0 mg, 0.2 mmol), **2a** (110.0 mg, 0.6 mmol), Zn(CN)<sub>2</sub> (27.8 mg, 0.24 mmol) and 1,4-dioxane (2.0 mL) was then added under argon atmosphere. The reaction mixture was stirred at 60 °C for 12 h in an oil bath. After cooling to room temperature, the mixture was extracted with ethyl acetate, dried over anhydrous MgSO<sub>4</sub> and concentrated under reduced pressure. The residue was then chromatographed on silica gel to afford the desired product **9**. White oil (29.9 mg, 61% yield). PE:EA = 20:1, R<sub>f</sub> = 0.6, <sup>1</sup>H NMR (400 MHz, CDCl<sub>3</sub>) δ 6.63 (s, 2H), 3.83 (s, 3H), 2.78 (t, *J* = 7.9 Hz, 4H), 1.64 (p, *J* = 7.6 Hz, 4H), 1.40 (h, *J* = 7.5 Hz, 4H), 0.95 (t, *J* = 7.4 Hz, 6H). <sup>13</sup>C NMR (100 MHz, CDCl<sub>3</sub>) δ 162.3, 149.3, 117.7, 112.3, 104.3, 55.3, 34.8, 32.9, 22.4, 13.8. IR (KBr): 2978, 2657, 2475, 1436, 1268, 754 cm<sup>-1</sup>. HRMS (ESI) *m/z* Calcd for C<sub>16</sub>H<sub>24</sub>NO [M+H]<sup>+</sup> 246.1852, found 246.1847.

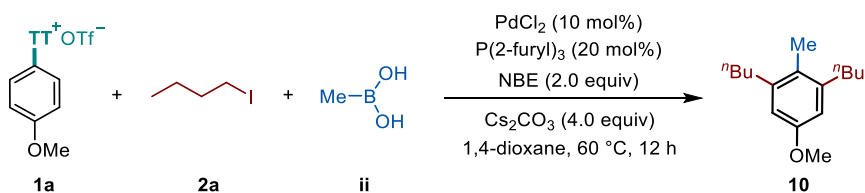

A 15.0 mL vial equipped with a stir bar was charged with PdCl<sub>2</sub> (3.6 mg, 10.0 mol%), P(2-furyl)<sub>3</sub> (9.3 mg, 20.0 mol%), norbornene (36.0 mg, 2.0 equiv), Cs<sub>2</sub>CO<sub>3</sub> (260.0 mg, 4.0 equiv), **1a** (95.0 mg, 0.2 mmol), **2a** (110.0 mg, 0.6 mmol), MeB(OH)<sub>2</sub> (14.4 mg, 0.24 mmol) and 1,4-dioxane (2.0 mL) was then added under argon atmosphere. The reaction mixture was stirred at 60 °C for 12 h in an oil bath. After cooling to room temperature, the mixture was extracted with ethyl acetate, dried over anhydrous MgSO<sub>4</sub> and concentrated under reduced pressure. The residue was then chromatographed on silica gel to afford the desired product **10**. White solid (30.0 mg, 64% yield). PE:EA = 40:1, R<sub>f</sub> = 0.5, <sup>1</sup>H NMR (400 MHz, CDCl<sub>3</sub>) δ 6.61 (s, 2H), 3.81 (s, 3H), 2.62 (t, *J* = 7.3 Hz, 4H), 2.20 (s, 3H), 1.64 – 1.55 (m, 4H), 1.49 – 1.41 (m, 4H), 0.99 (t, *J* = 7.3 Hz, 6H). <sup>13</sup>C NMR (100 MHz, CDCl<sub>3</sub>) δ 157.0, 142.5, 125.7, 112.2, 55.0, 34.2, 32.7, 22.8, 14.0, 13.7. IR (KBr): 2950, 2602, 2398, 1426, 1211, 745 cm<sup>-1</sup>. HRMS (ESI) *m/z* Calcd for C<sub>16</sub>H<sub>27</sub>O [M+H]<sup>+</sup> 235.2056, found 235.2061.

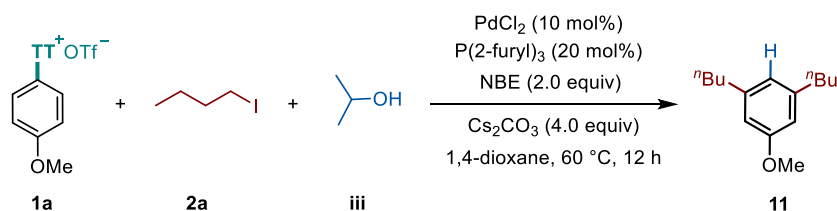

A 15.0 mL vial equipped with a stir bar was charged with PdCl<sub>2</sub> (3.6 mg, 10.0 mol%), P(2-furyl)<sub>3</sub> (9.3 mg, 20.0 mol%), norbornene (36.0 mg, 2.0 equiv), Cs<sub>2</sub>CO<sub>3</sub> (260.0 mg, 4.0 equiv), **1a** (95.0 mg, 0.2 mmol), **2a** (110.0 mg, 0.6 mmol), *i*PrOH (14.4 mg, 0.24 mmol) and 1,4-dioxane (2.0 mL) was then added under argon atmosphere. The reaction mixture was stirred at 60 °C for 12 h in an oil bath. After cooling to room temperature, the mixture was extracted with ethyl acetate, dried over anhydrous MgSO<sub>4</sub> and concentrated under reduced pressure. The residue was then chromatographed on silica gel to afford the desired product **11**. White solid (29.5 mg, 67% yield). PE:EA = 40:1, R<sub>f</sub> = 0.5, <sup>1</sup>H NMR (400 MHz, CDCl<sub>3</sub>) δ 6.63 (s, 2H), 5.30 (s, 1H), 3.83 (s, 3H), 2.79 (t, *J* = 7.4 Hz, 4H), 1.68 – 1.60 (m, 4H), 1.43 – 1.37 (m, 4H), 0.95 (t, *J* = 7.4 Hz, 6H). <sup>13</sup>C NMR



(100 MHz, CDCl<sub>3</sub>)  $\delta$  162.3, 149.3, 117.7, 112.3, 104.3, 55.3, 34.8, 32.9, 22.4, 13.9. IR (KBr): 2895, 2655, 2435, 1428, 1255, 776 cm<sup>-1</sup>. HRMS (ESI)  $m/z$  Calcd for C<sub>15</sub>H<sub>25</sub>O [M+H]<sup>+</sup> 221.1900, found 221.1907.

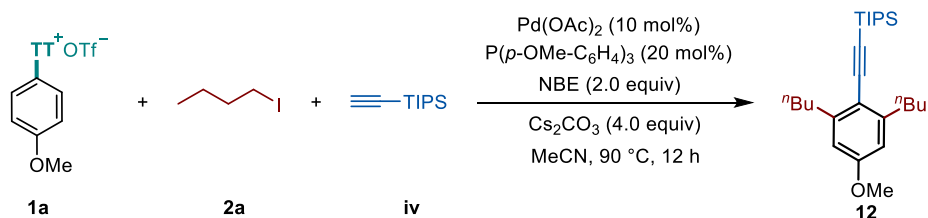

A 15.0 mL vial equipped with a stir bar was charged with Pd(OAc)<sub>2</sub> (3.6 mg, 10.0 mol%), P(*p*-OMe-C<sub>6</sub>H<sub>4</sub>)<sub>3</sub> (7.1 mg, 20.0 mol%), norbornene (72.0 mg, 4.0 equiv), Cs<sub>2</sub>CO<sub>3</sub> (260.0 mg, 4.0 equiv), **1a** (95.0 mg, 0.2 mmol), **2a** (220.0 mg, 1.2 mmol), **iv** (43.6 mg, 0.24 mmol) and 1,4-dioxane (2.0 mL) was then added under argon atmosphere. The reaction mixture was stirred at 60 °C for 12 h in an oil bath. After cooling to room temperature, the mixture was extracted with ethyl acetate, dried over anhydrous MgSO<sub>4</sub> and concentrated under reduced pressure. The residue was then chromatographed on silica gel to afford the desired product **12**. White solid (44.0 mg, 55% yield). PE:EA = 40:1, R<sub>f</sub> = 0.5, <sup>1</sup>H NMR (400 MHz, CDCl<sub>3</sub>)  $\delta$  6.57 (s, 2H), 3.79 (s, 3H), 2.79 (t, *J* = 7.4 Hz, 4H), 1.67 – 1.58 (m, 4H), 1.44 – 1.36 (m, 4H), 1.14 (s, 21H), 0.92 (t, *J* = 7.3 Hz, 6H). <sup>13</sup>C NMR (100 MHz, CDCl<sub>3</sub>)  $\delta$  159.0, 147.6, 114.8, 111.6, 104.2, 96.0, 55.1, 35.4, 33.0, 29.7, 22.8, 18.7, 14.0, 11.4. IR (KBr): 2951, 2527, 2355, 1386, 1258, 1120, 765 cm<sup>-1</sup>. HRMS (ESI)  $m/z$  Calcd for C<sub>26</sub>H<sub>45</sub>OSi [M+H]<sup>+</sup> 401.3234, found 401.3230.

## H. Reactivity of Aryl-TTs and Recovery Study

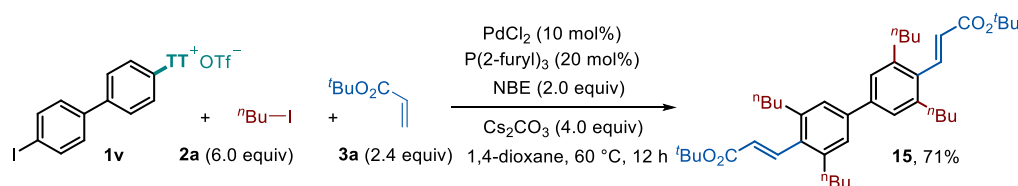

A 15.0 mL vial equipped with a stir bar was charged with PdCl<sub>2</sub> (3.6 mg, 10.0 mol%), P(2-furyl)<sub>3</sub> (9.3 mg, 20.0 mol%), norbornene (72.0 mg, 4.0 equiv), Cs<sub>2</sub>CO<sub>3</sub> (260.0 mg, 8.0 equiv), **1v** (86.8 mg, 0.2 mmol), **2a** (220.0 mg, 1.2 mmol), **3a** (61.6 mg, 0.48 mmol) and 1,4-dioxane (2.0 mL) was then added under argon atmosphere. The reaction mixture was stirred at 60 °C for 12 h in an oil bath. After cooling to room temperature, the mixture was extracted with ethyl acetate, dried over anhydrous MgSO<sub>4</sub> and concentrated under reduced pressure. The residue was then chromatographed

on silica gel to afford the desired product **15**. White solid (89.5 mg, 71% yield). PE:EA = 40:1,  $R_f = 0.4$ ,  $^1\text{H NMR}$  (400 MHz,  $\text{CDCl}_3$ )  $\delta$  7.81 (d,  $J = 16.3$  Hz, 2H), 5.97 (d,  $J = 16.3$  Hz, 2H), 2.69 (t,  $J = 8.0$  Hz, 8H), 1.62 – 1.56 (m, 8H), 1.55 (s, 18H), 1.42 – 1.36 (m, 8H), 0.93 (t,  $J = 7.4$  Hz, 12H).  $^{13}\text{C NMR}$  (100 MHz,  $\text{CDCl}_3$ )  $\delta$  165.9, 142.2, 141.7, 140.4, 133.0, 125.8, 125.7, 80.5, 33.7, 33.4, 28.2, 22.6, 13.9. IR (KBr): 2933, 2645, 1986, 1706, 1524, 1121, 734  $\text{cm}^{-1}$ . HRMS (ESI)  $m/z$  Calcd for  $\text{C}_{34}\text{H}_{47}\text{O}_4$   $[\text{M}+\text{H}]^+$  518.3396, found 518.3389.

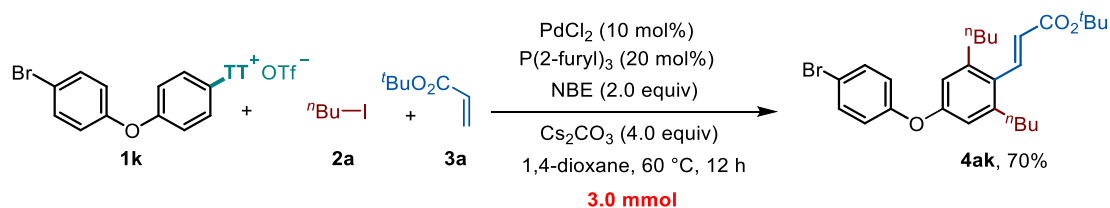

A 15.0 mL vial equipped with a stir bar was charged with  $\text{PdCl}_2$  (53.1 mg, 10.0 mol%),  $\text{P}(2\text{-furyl})_3$  (139.2 mg, 20.0 mol%), norbornene (564.0 mg, 2.0 equiv),  $\text{Cs}_2\text{CO}_3$  (3.9 g, 4.0 equiv), **1k** (1.2 g, 3.0 mmol), **2a** (1.6 g, 9.0 mmol), **3a** (460.8 mg, 3.6 mmol) and 1,4-dioxane (10.0 mL) was then added under argon atmosphere. The reaction mixture was stirred at 60 °C for 12 h in an oil bath. After cooling to room temperature, the mixture was extracted with ethyl acetate, dried over anhydrous  $\text{MgSO}_4$  and concentrated under reduced pressure. The residue was then chromatographed on silica gel to afford the desired product **4ak** (1.02 g, 70%).

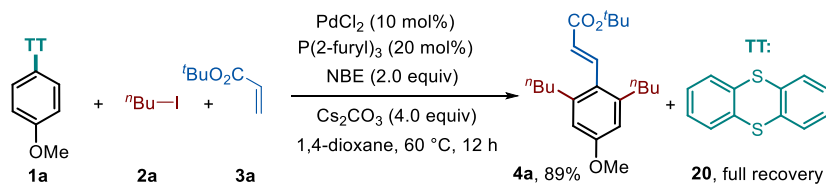

A 15.0 mL vial equipped with a stir bar was charged with  $\text{PdCl}_2$  (3.6 mg, 10.0 mol%),  $\text{P}(2\text{-furyl})_3$  (9.3 mg, 20.0 mol%), norbornene (36.0 mg, 2.0 equiv),  $\text{Cs}_2\text{CO}_3$  (260.0 mg, 4.0 equiv), **1a** (95.0 mg, 0.2 mmol), **2** (110.0 mg, 0.6 mmol), **3a** (30.8 mg, 0.24 mmol) and 1,4-dioxane (2.0 mL) was then added under argon atmosphere. The reaction mixture was stirred at 60 °C for 12 h in an oil bath. After cooling to room temperature, the mixture was extracted with ethyl acetate, dried over anhydrous  $\text{MgSO}_4$  and concentrated under reduced pressure. The residue was then chromatographed on silica gel to afford the desired product **4a** (61.63 mg, 89%) and compound **20** (41.5 mg, 96%).

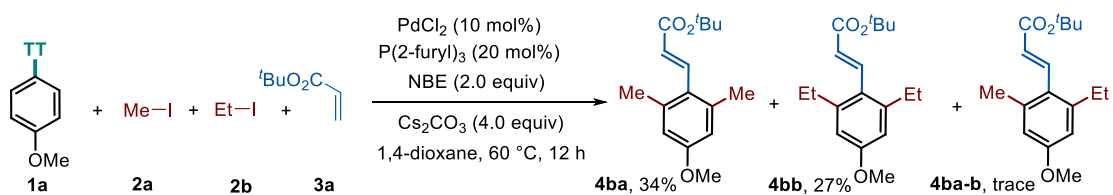

A 15.0 mL vial equipped with a stir bar was charged with  $\text{PdCl}_2$  (3.6 mg, 10.0 mol%),  $\text{P}(2\text{-furyl})_3$  (9.3 mg, 20.0 mol%), norbornene (36.0 mg, 2.0 equiv),  $\text{Cs}_2\text{CO}_3$  (260.0 mg, 4.0 equiv), **1a** (95.0 mg, 0.2 mmol), **2a** (34.5 mg, 0.3 mmol), **2b** (46.8 mg, 0.3 mmol), **3a** (30.8 mg, 0.24 mmol) and 1,4-dioxane (2.0 mL) was then added under argon atmosphere. The reaction mixture was stirred at 60 °C for 12 h in an oil bath. After cooling to room temperature, the mixture was extracted with ethyl acetate, dried over anhydrous  $\text{MgSO}_4$  and concentrated under reduced pressure. The residue was then chromatographed on silica gel to afford the desired product **4ba** (17.9 mg, 34%), **4bb** (15.7 mg, 27%), **4ba-b** (trace).

## I. NMR spectra

$^1\text{H}$  NMR of **4aa** (400 MHz,  $\text{CDCl}_3$ )

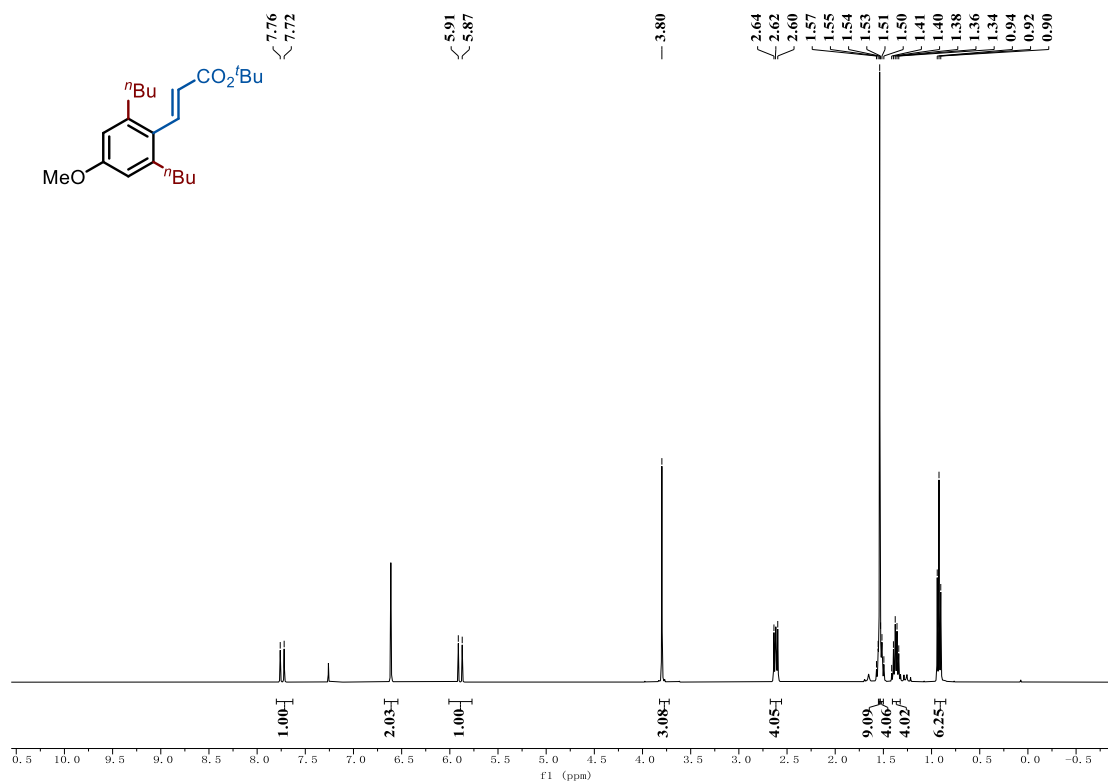

$^{13}\text{C}$  NMR of **4aa** (100 MHz,  $\text{CDCl}_3$ )

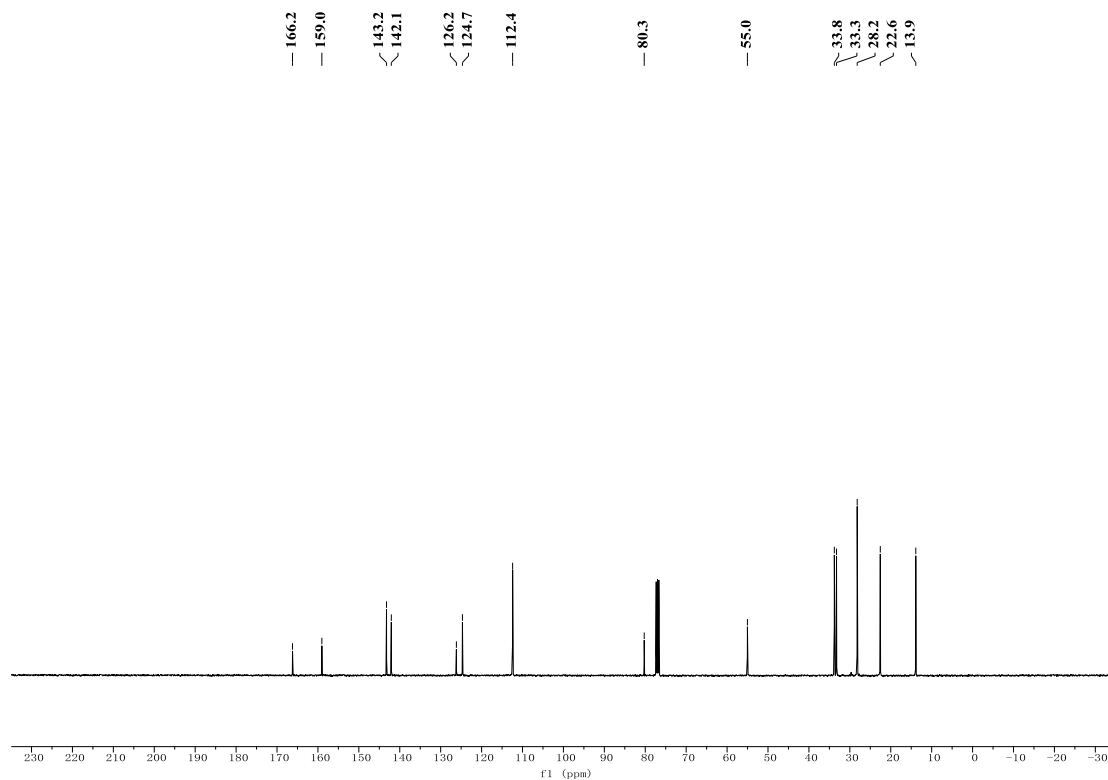

$^1\text{H}$  NMR of **4ab** (400 MHz,  $\text{CDCl}_3$ )

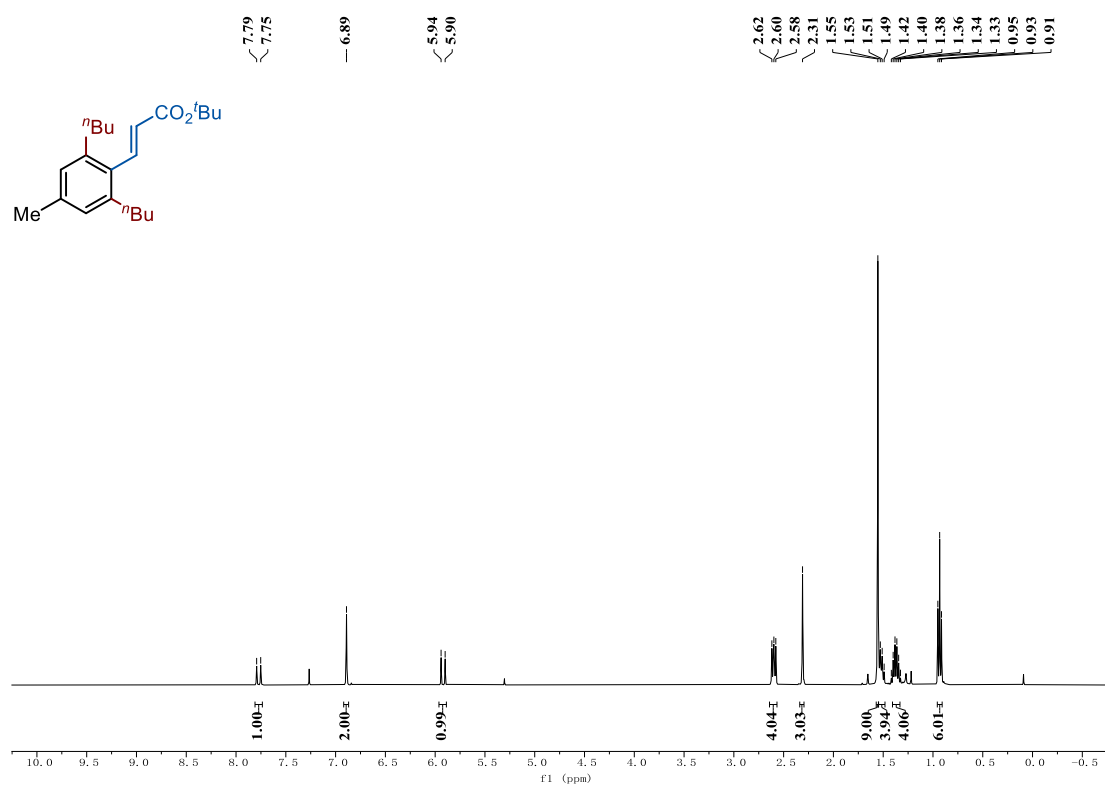

$^{13}\text{C}$  NMR of **4ab** (100 MHz,  $\text{CDCl}_3$ )

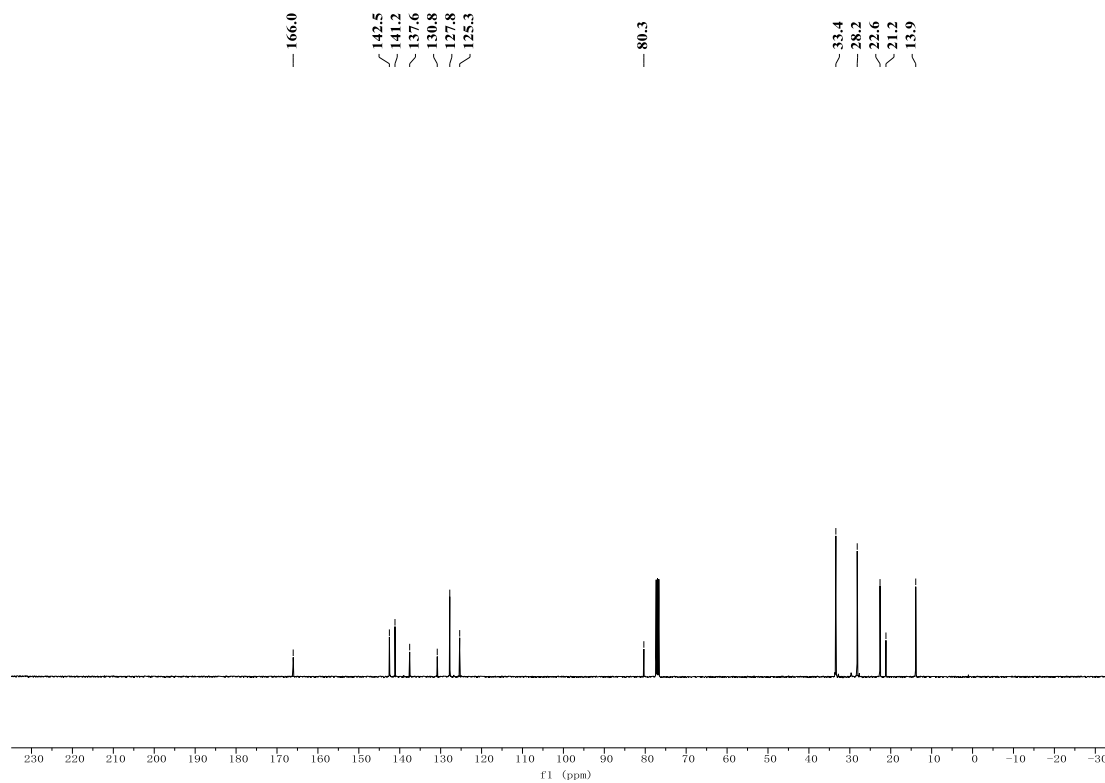

<sup>1</sup>H NMR of **4ac** (400 MHz, CDCl<sub>3</sub>)

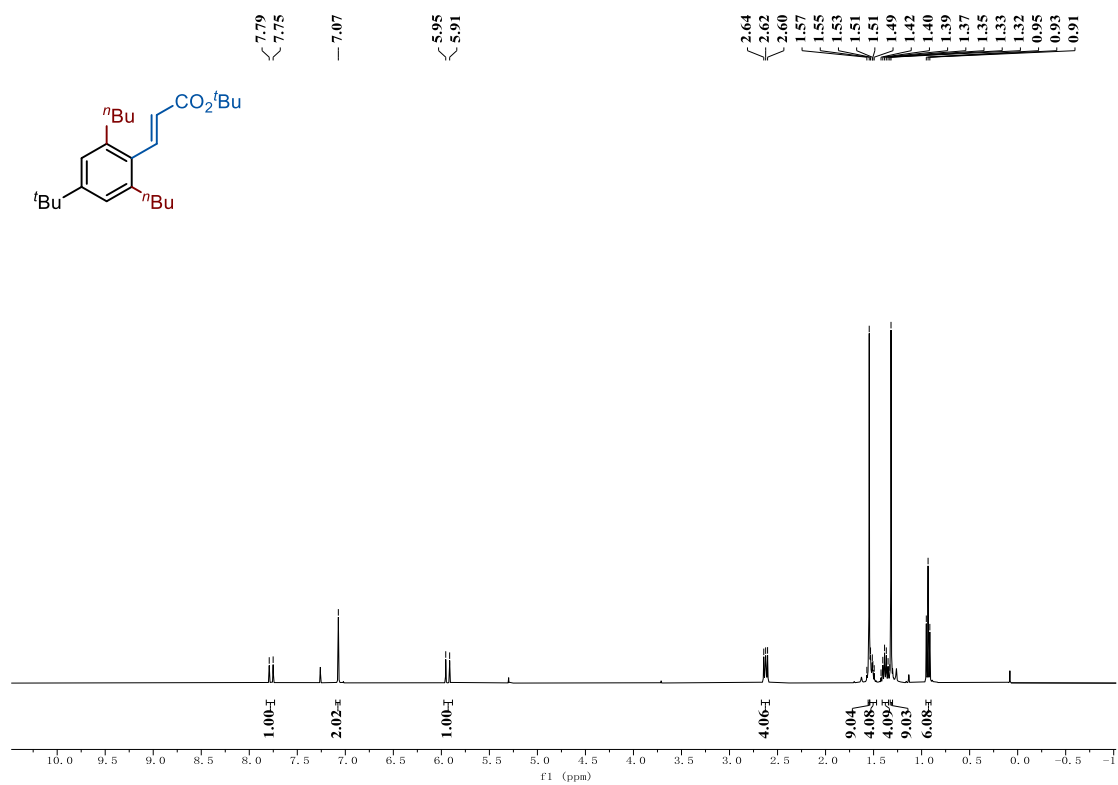

<sup>13</sup>C NMR of **4ac** (100 MHz, CDCl<sub>3</sub>)

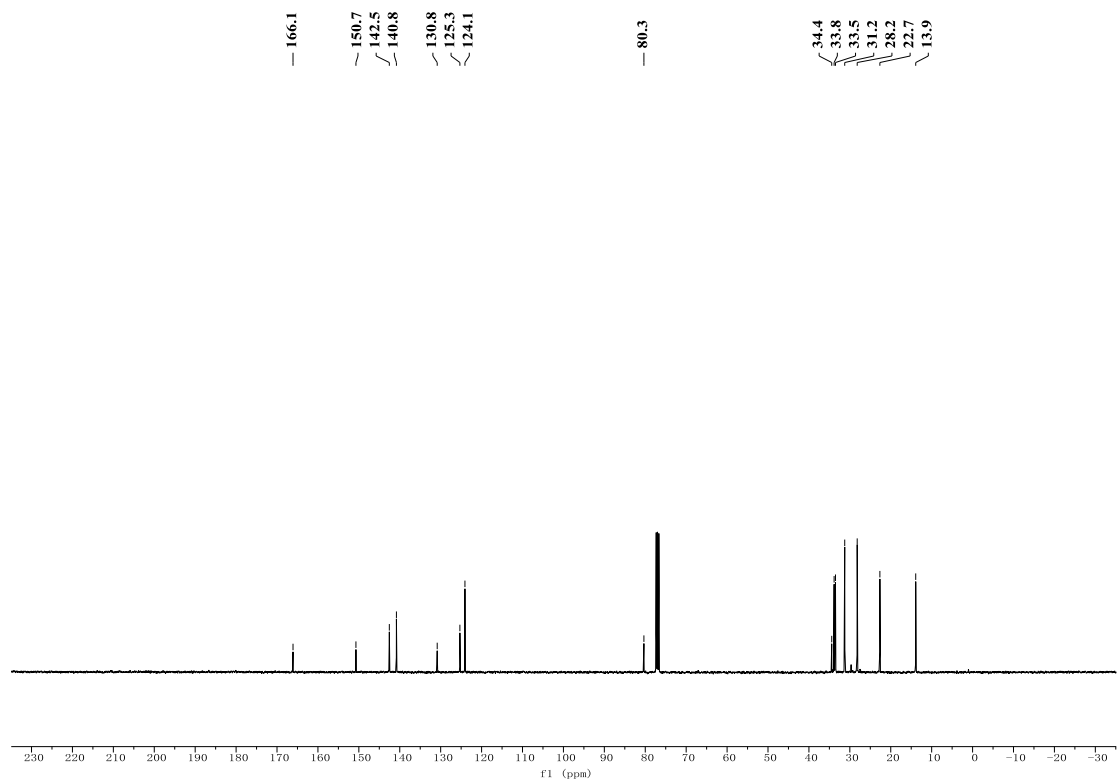

$^1\text{H}$  NMR of **4ad** (400 MHz,  $\text{CDCl}_3$ )

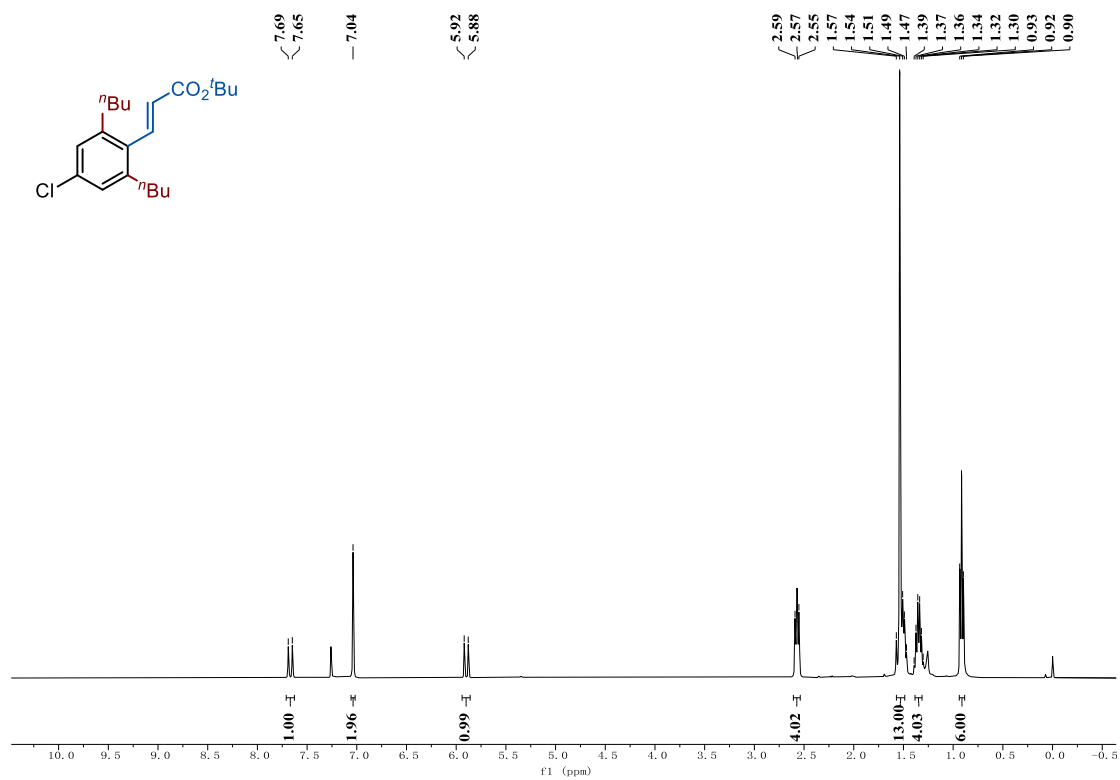

$^{13}\text{C}$  NMR of **4ad** (100 MHz,  $\text{CDCl}_3$ )

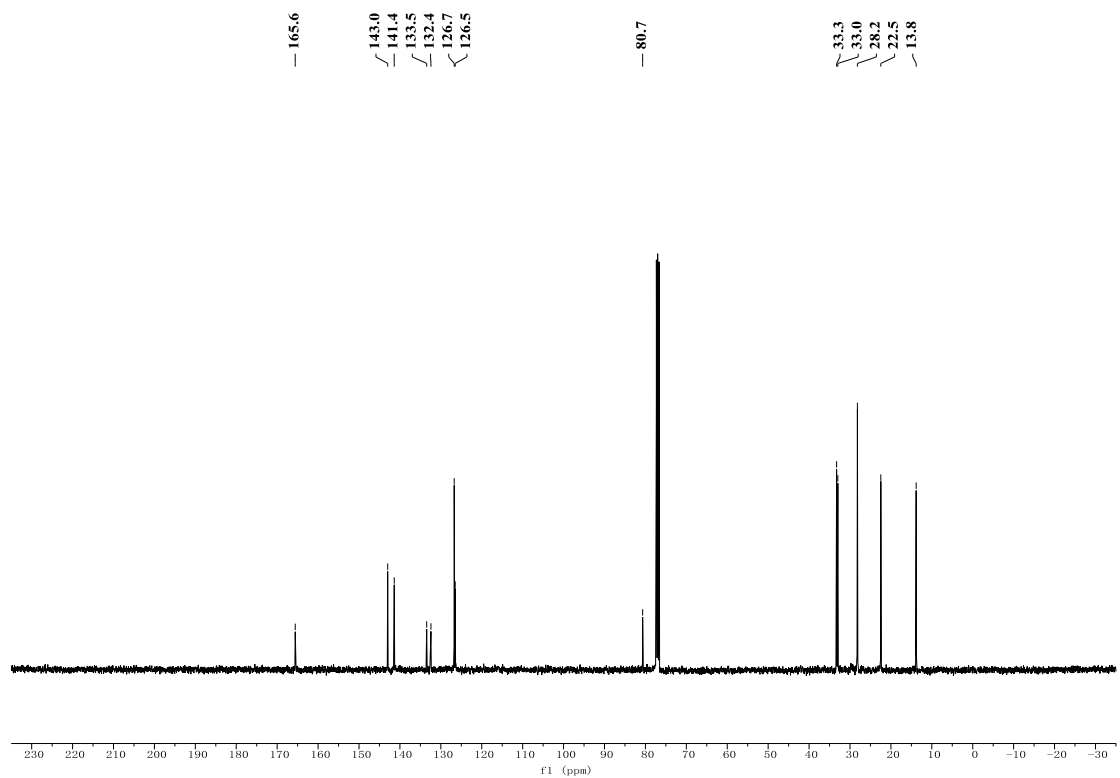

$^1\text{H}$  NMR of **4ae** (400 MHz,  $\text{CDCl}_3$ )

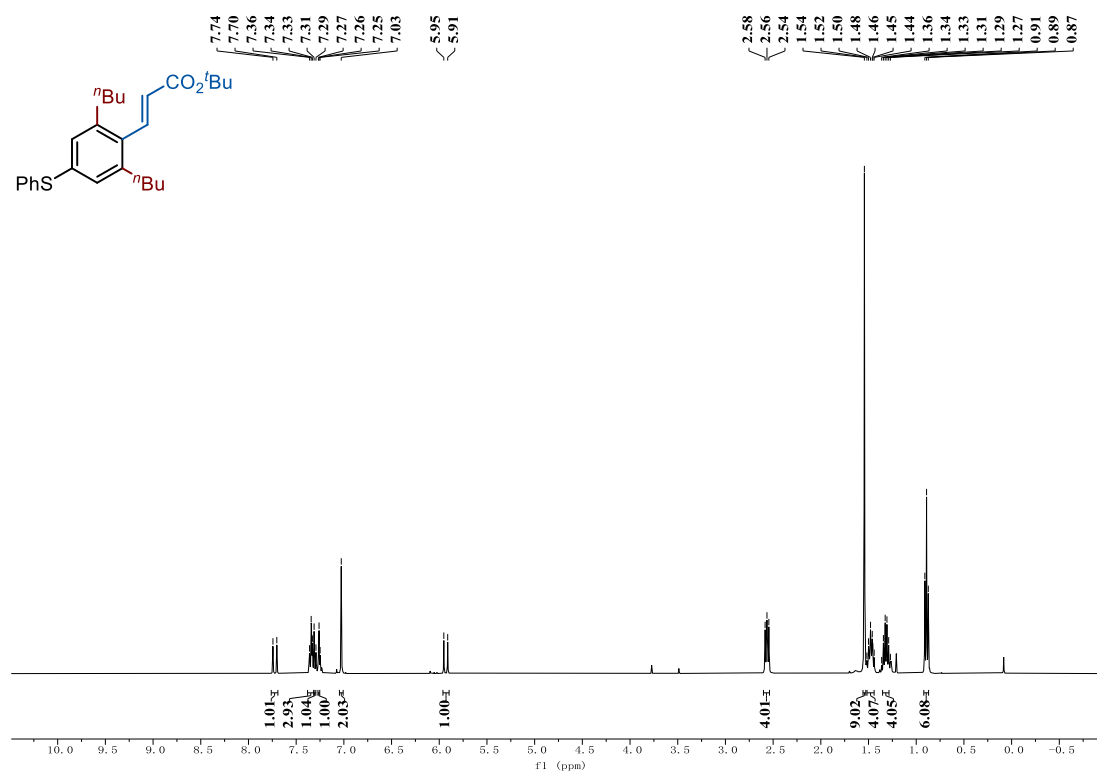

$^{13}\text{C}$  NMR of **4ae** (100 MHz,  $\text{CDCl}_3$ )

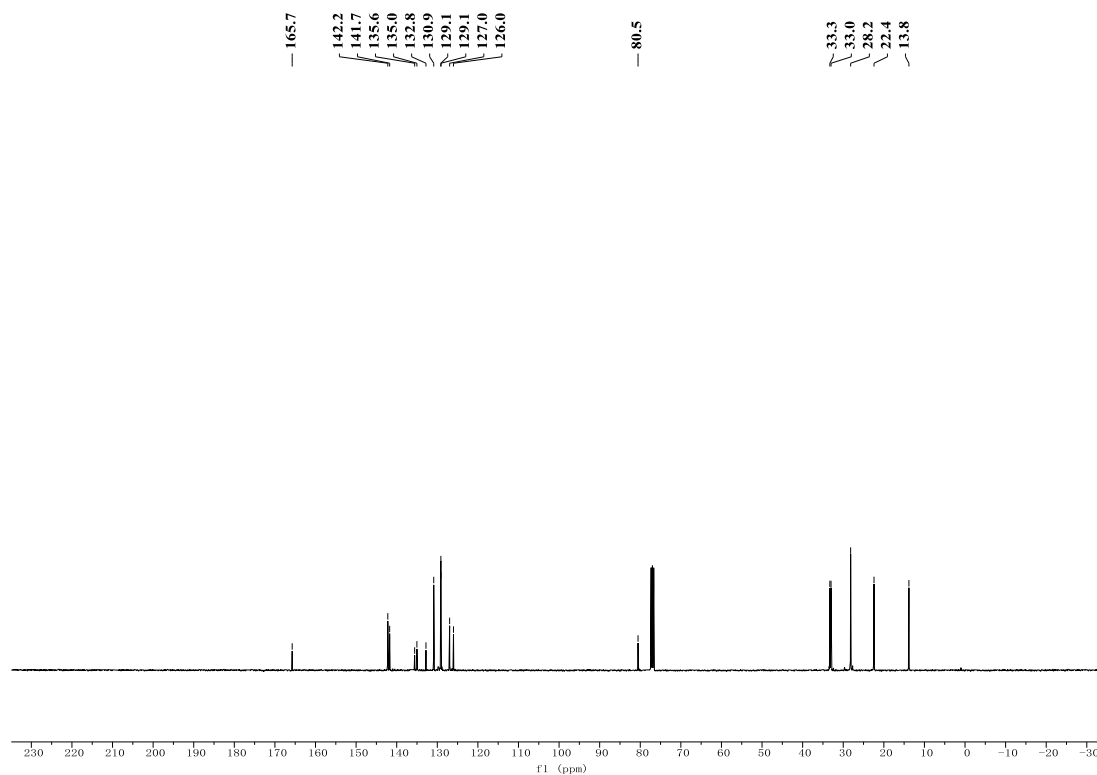



$^1\text{H}$  NMR of **4af** (400 MHz,  $\text{CDCl}_3$ )

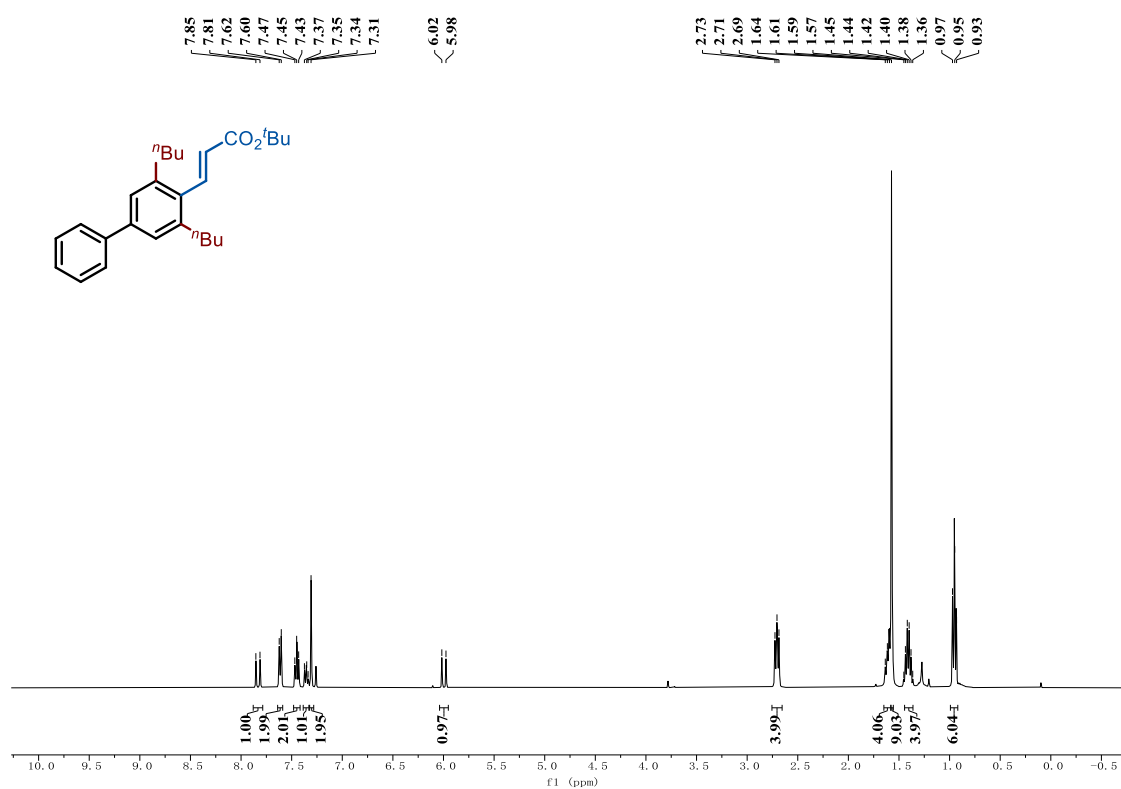

$^{13}\text{C}$  NMR of **4af** (100 MHz,  $\text{CDCl}_3$ )

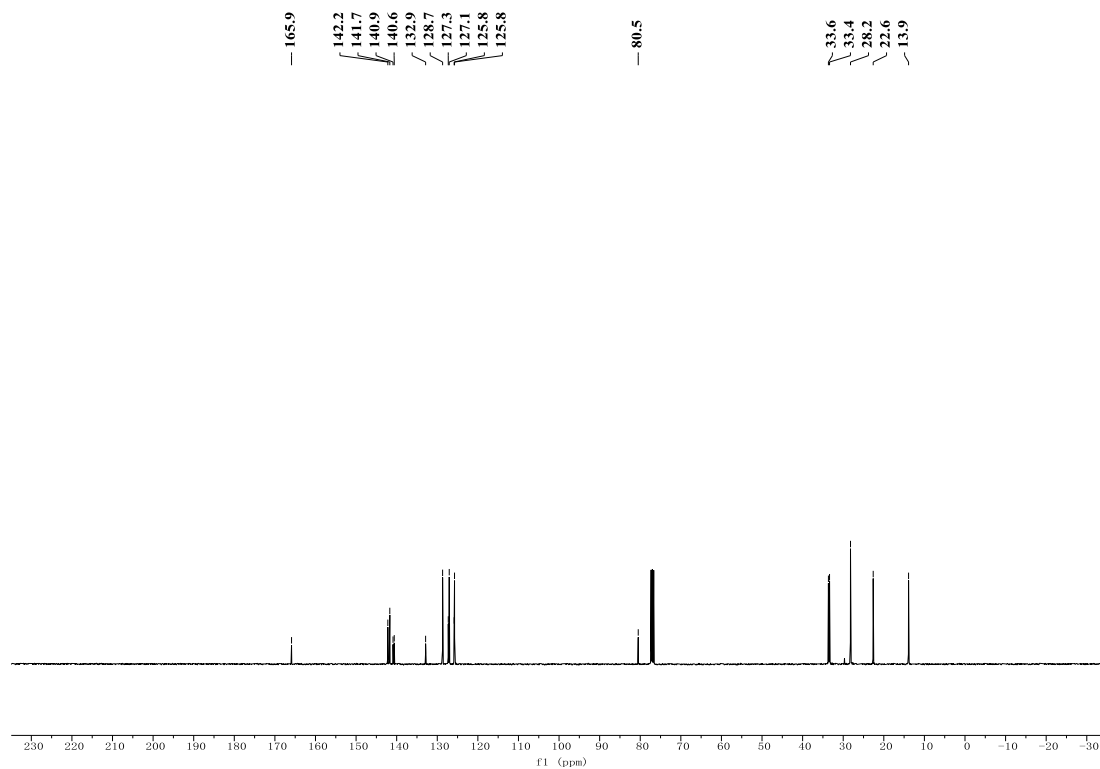

$^1\text{H}$  NMR of **4ag** (400 MHz,  $\text{CDCl}_3$ )

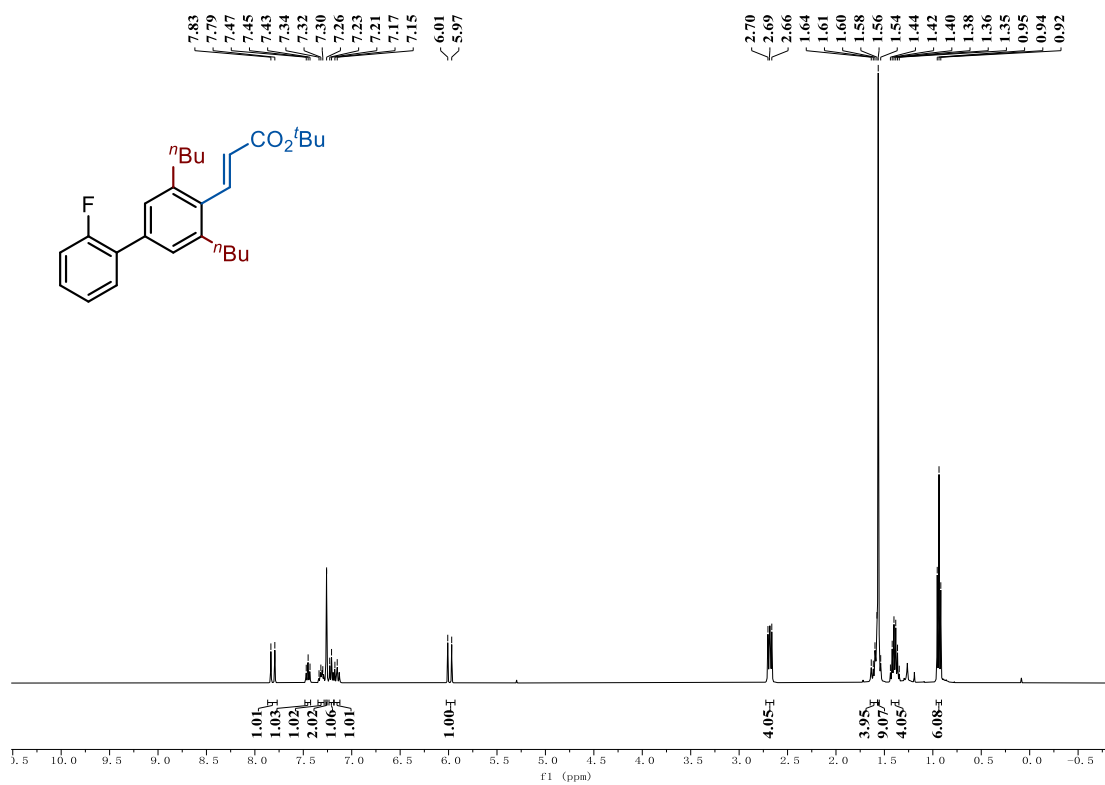

$^{13}\text{C}$  NMR of **4ag** (100 MHz,  $\text{CDCl}_3$ )

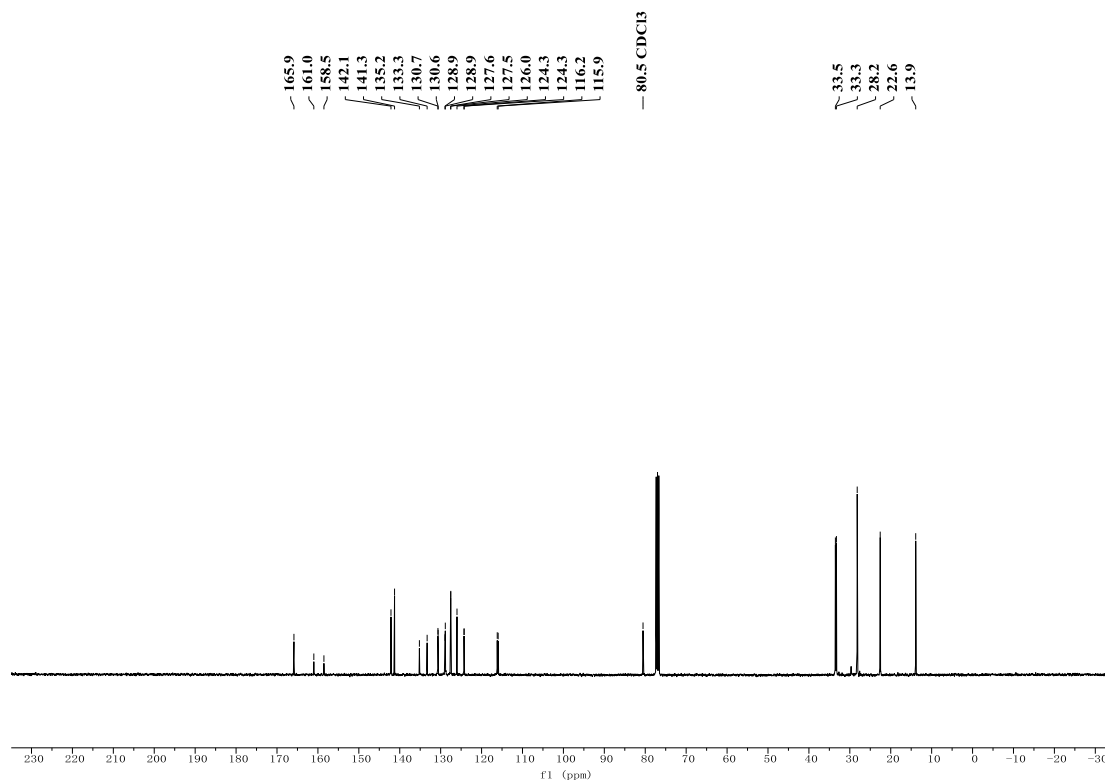

$^{19}\text{F}$  NMR of **4ag** (400 MHz,  $\text{CDCl}_3$ )

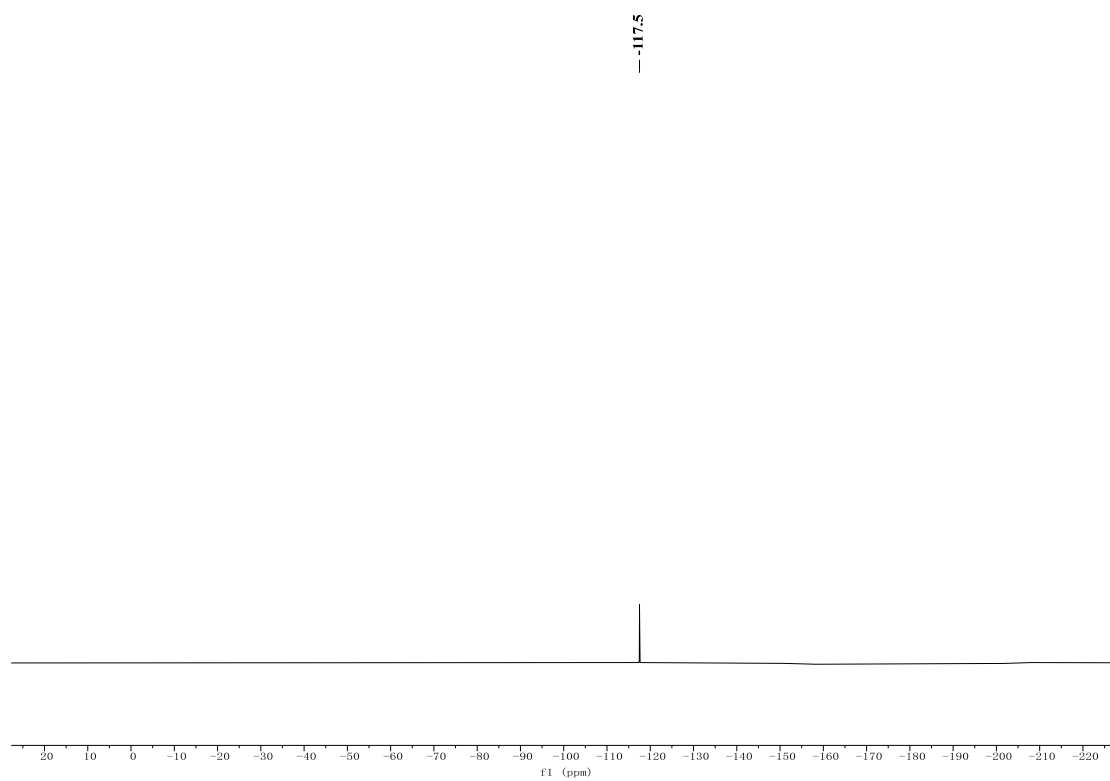

<sup>1</sup>H NMR of **4ah** (400 MHz, CDCl<sub>3</sub>)

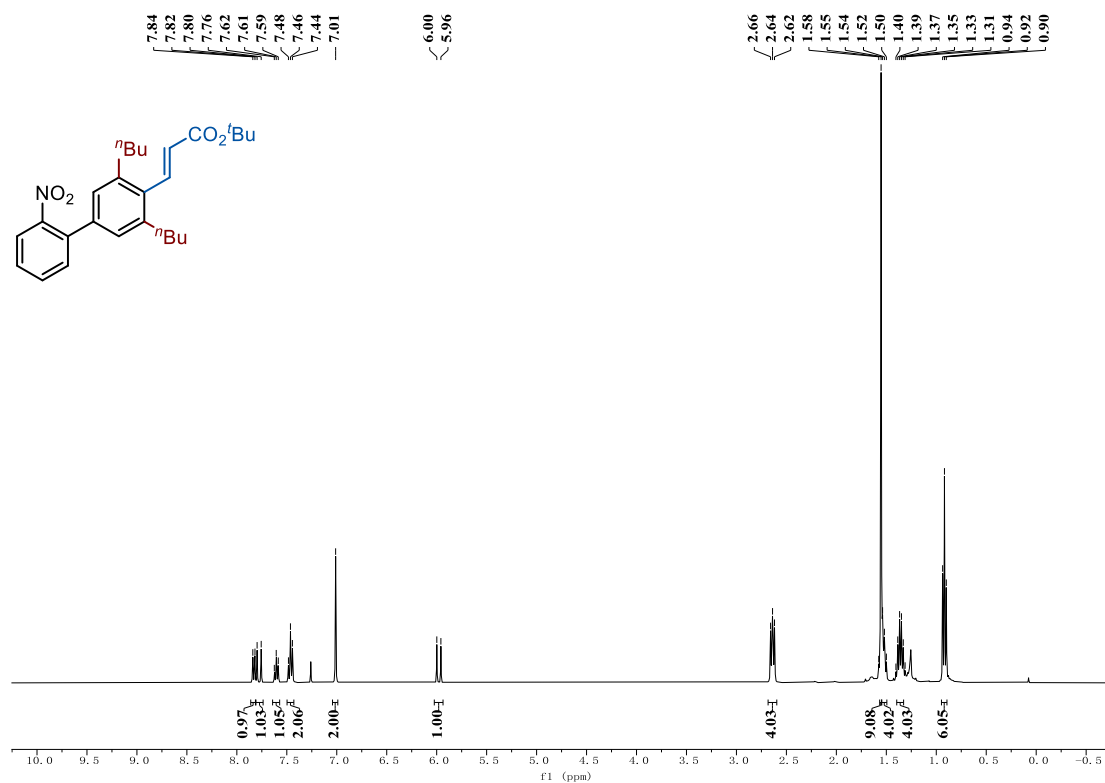

<sup>13</sup>C NMR of **4ah** (100 MHz, CDCl<sub>3</sub>)

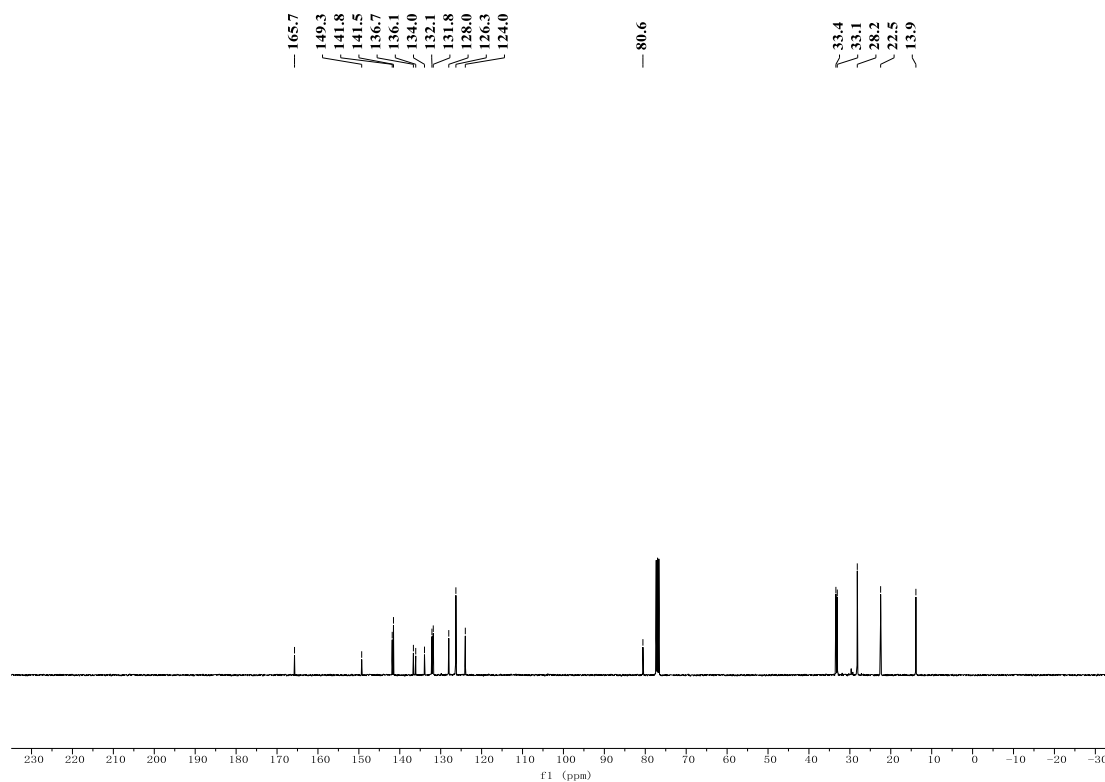

$^1\text{H}$  NMR of **4ai** (400 MHz,  $\text{CDCl}_3$ )

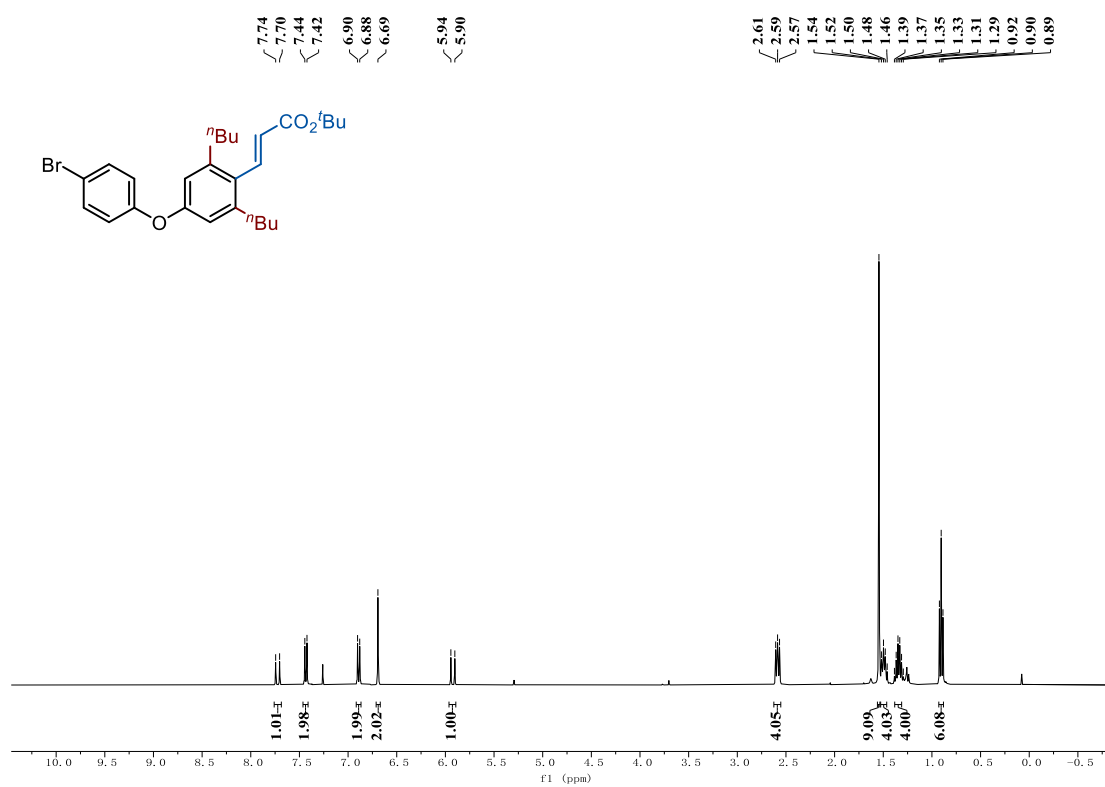

$^{13}\text{C}$  NMR of **4ai** (100 MHz,  $\text{CDCl}_3$ )

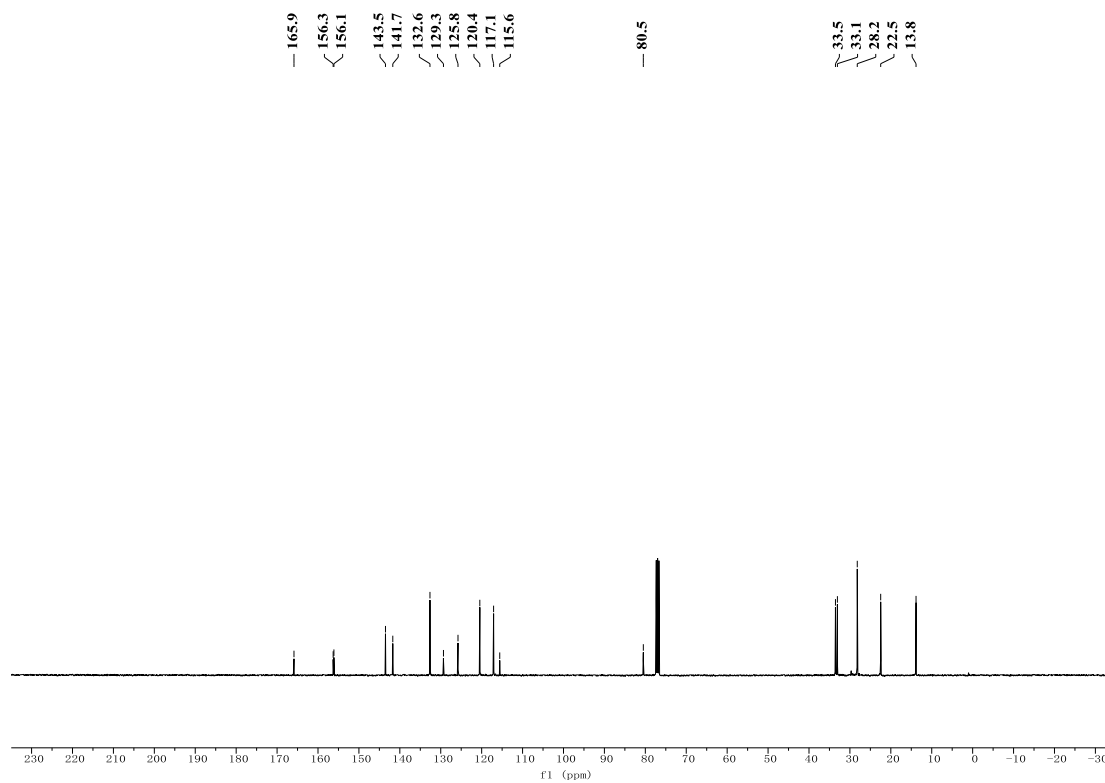

$^1\text{H}$  NMR of **4aj** (400 MHz,  $\text{CDCl}_3$ )

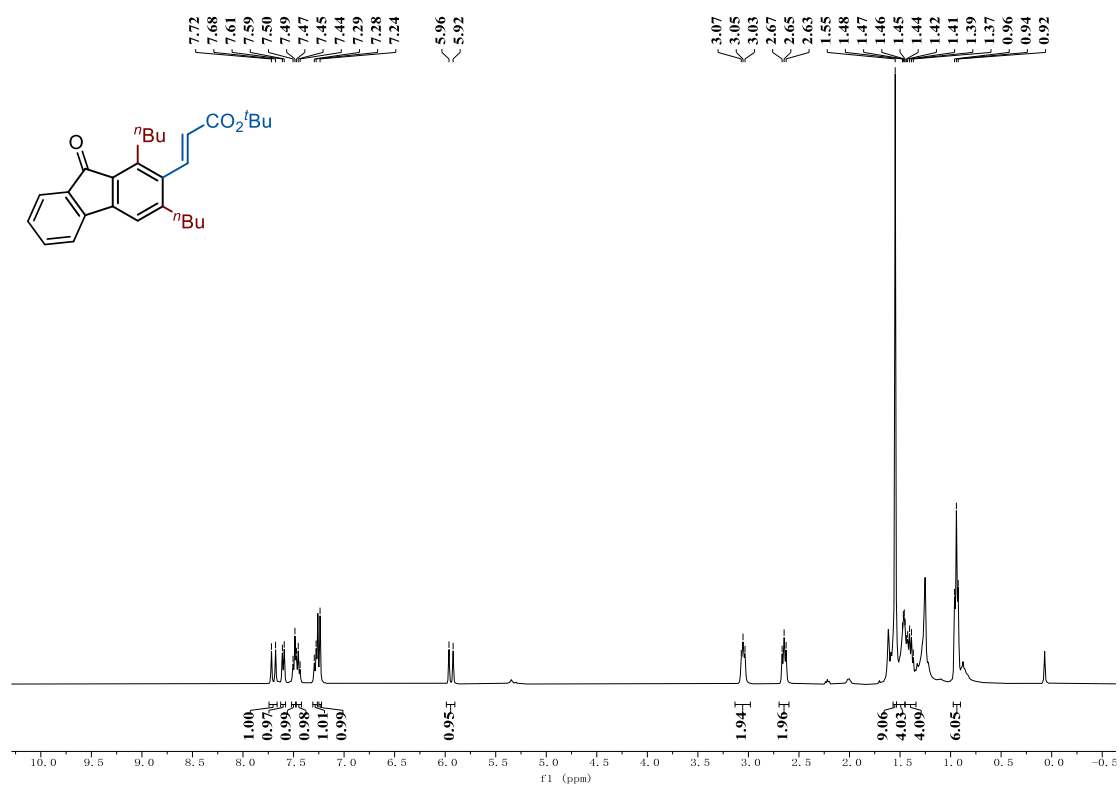

$^{13}\text{C}$  NMR of **4aj** (100 MHz,  $\text{CDCl}_3$ )

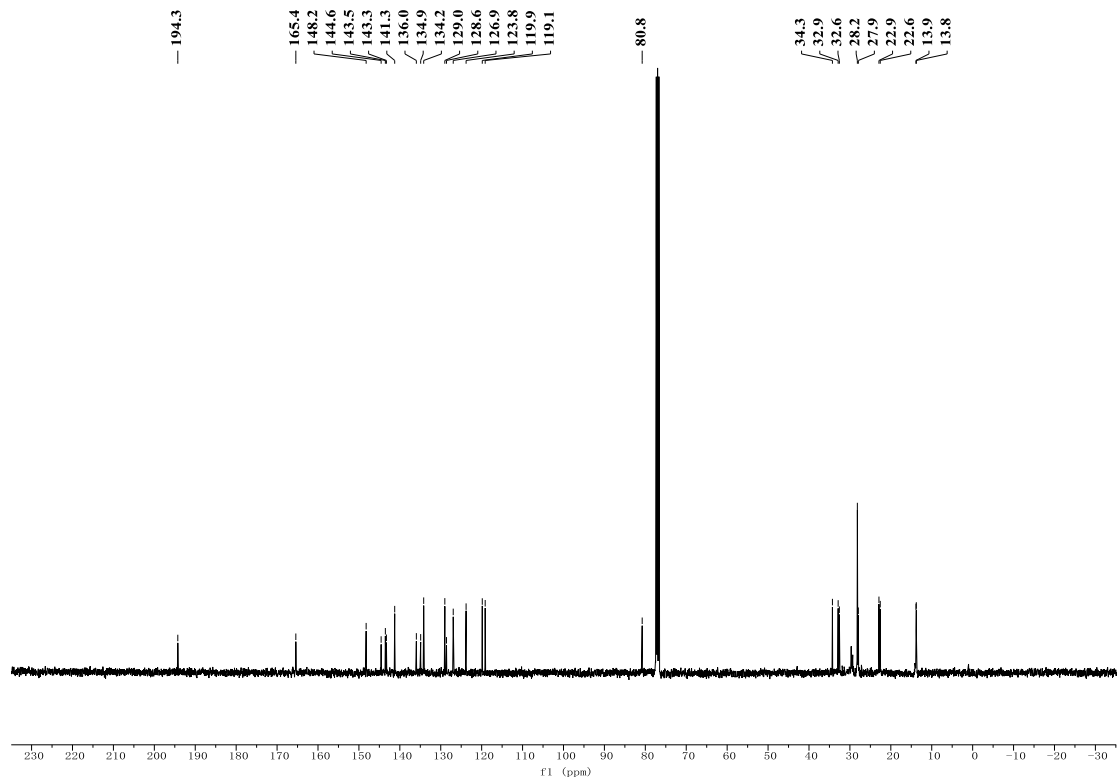

<sup>1</sup>H NMR of **4ak** (400 MHz, CDCl<sub>3</sub>)

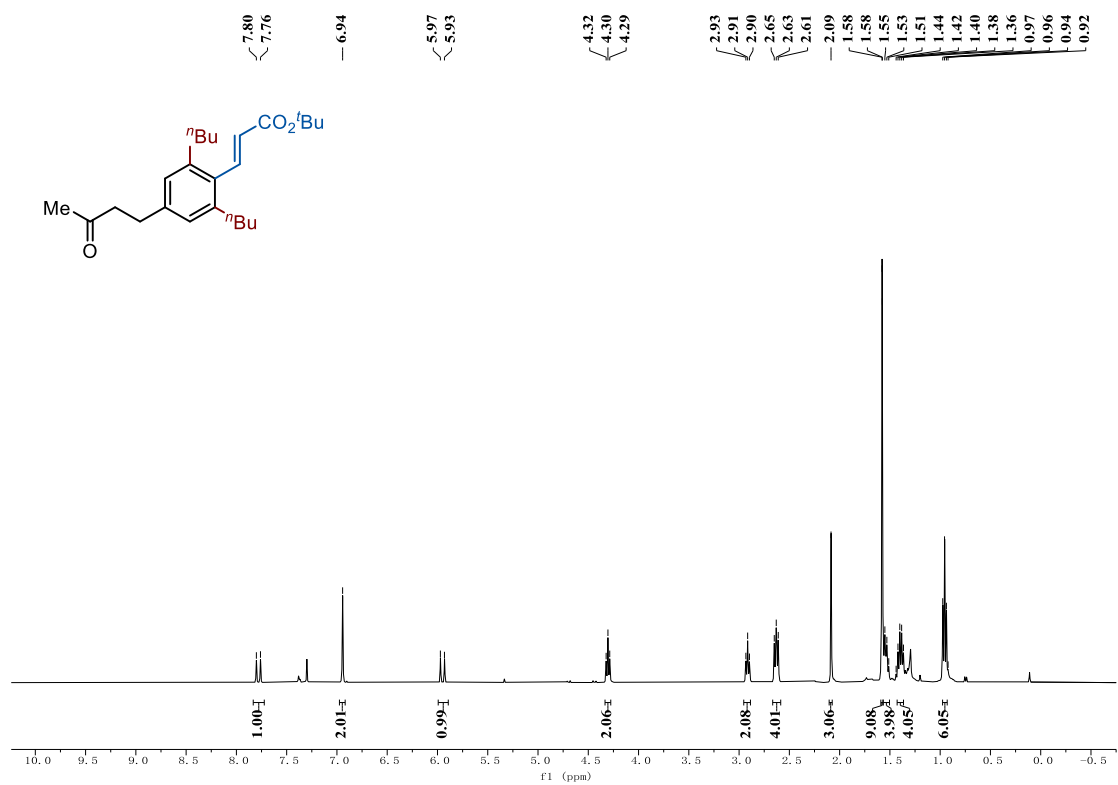

<sup>13</sup>C NMR of **4ak** (100 MHz, CDCl<sub>3</sub>)

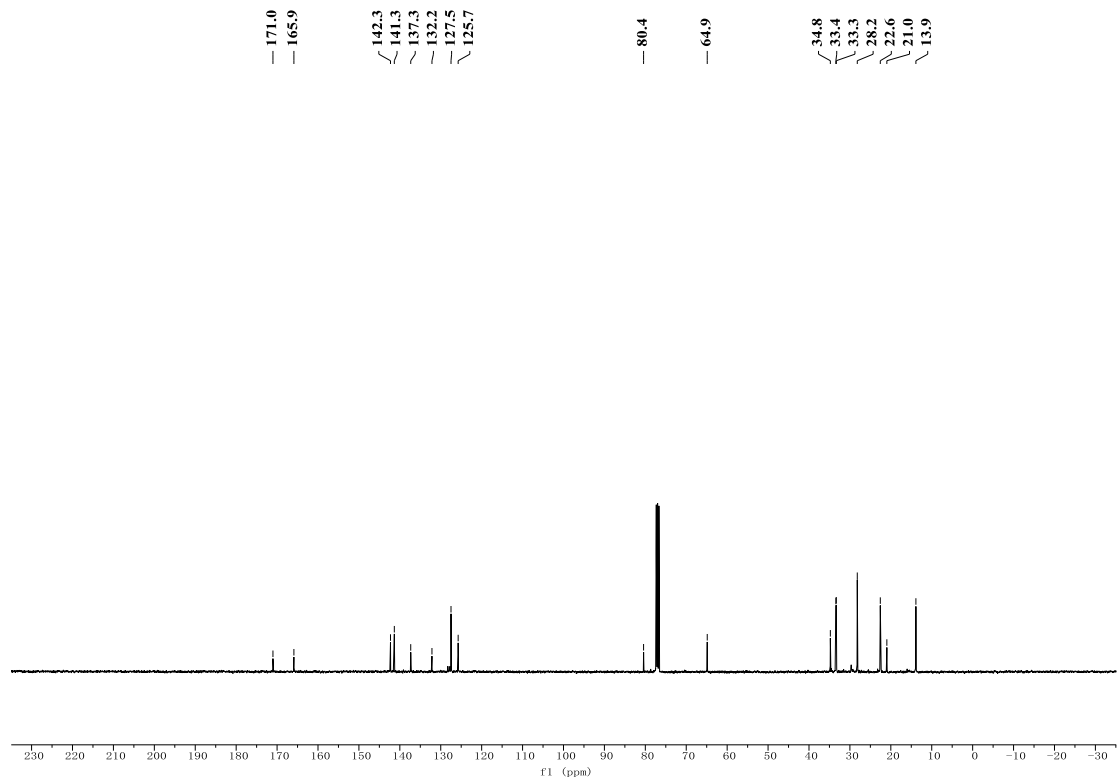

$^1\text{H}$  NMR of **4al** (400 MHz,  $\text{CDCl}_3$ )

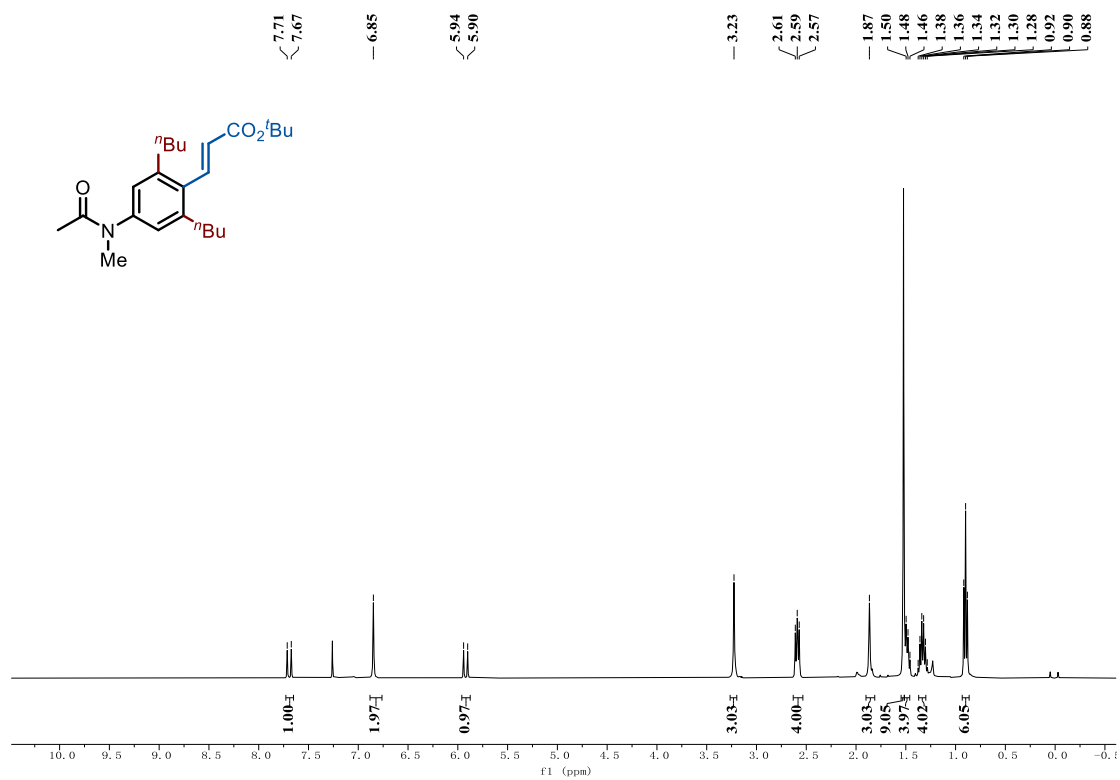

$^{13}\text{C}$  NMR of **4al** (100 MHz,  $\text{CDCl}_3$ )

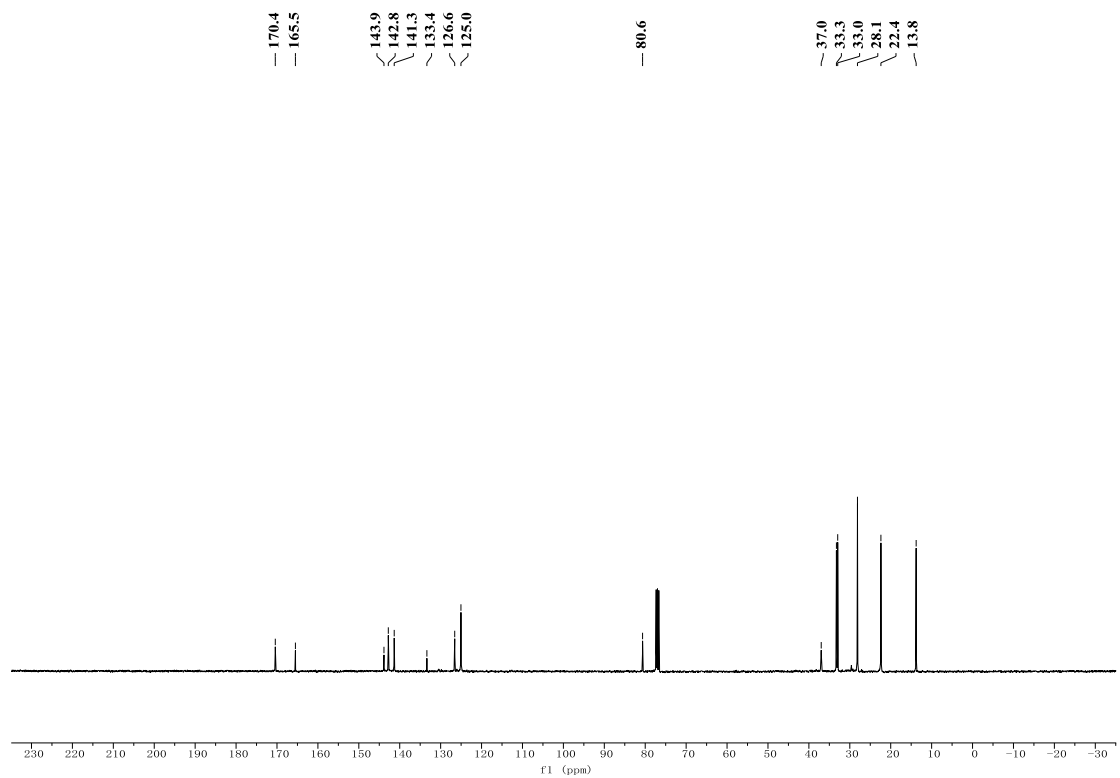



$^1\text{H}$  NMR of **4am** (400 MHz,  $\text{CDCl}_3$ )

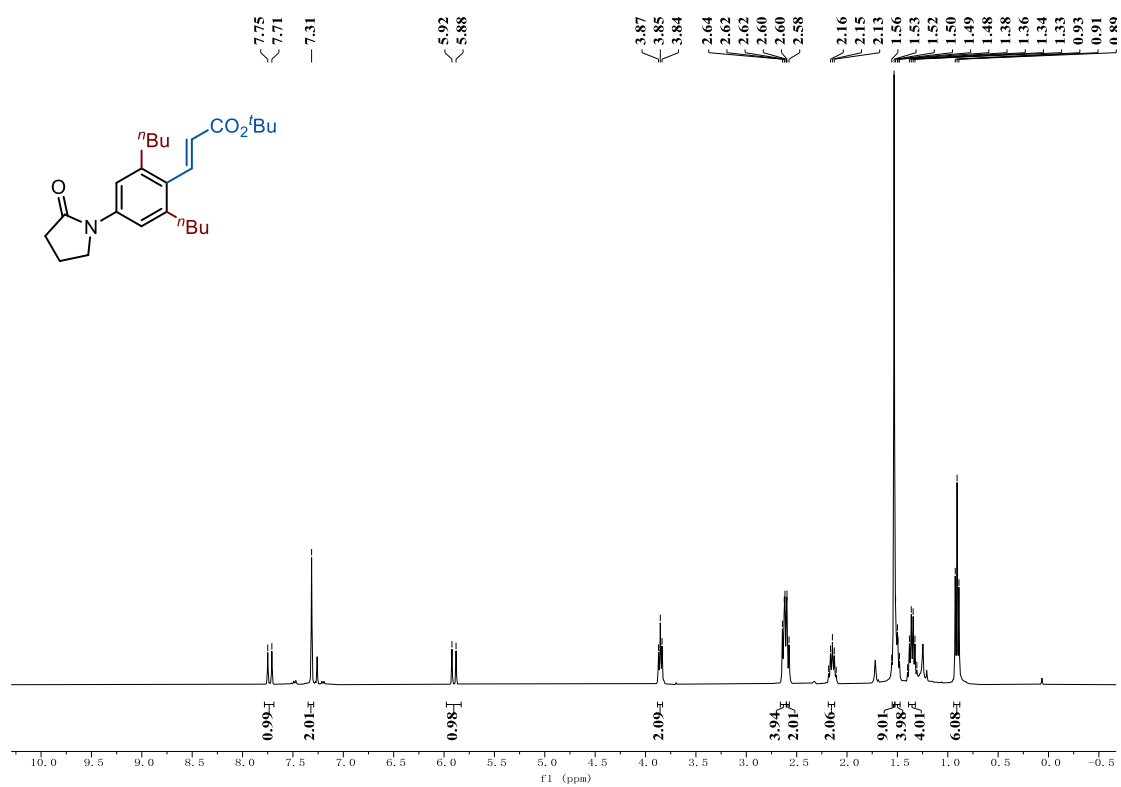

$^{13}\text{C}$  NMR of **4am** (100 MHz,  $\text{CDCl}_3$ )

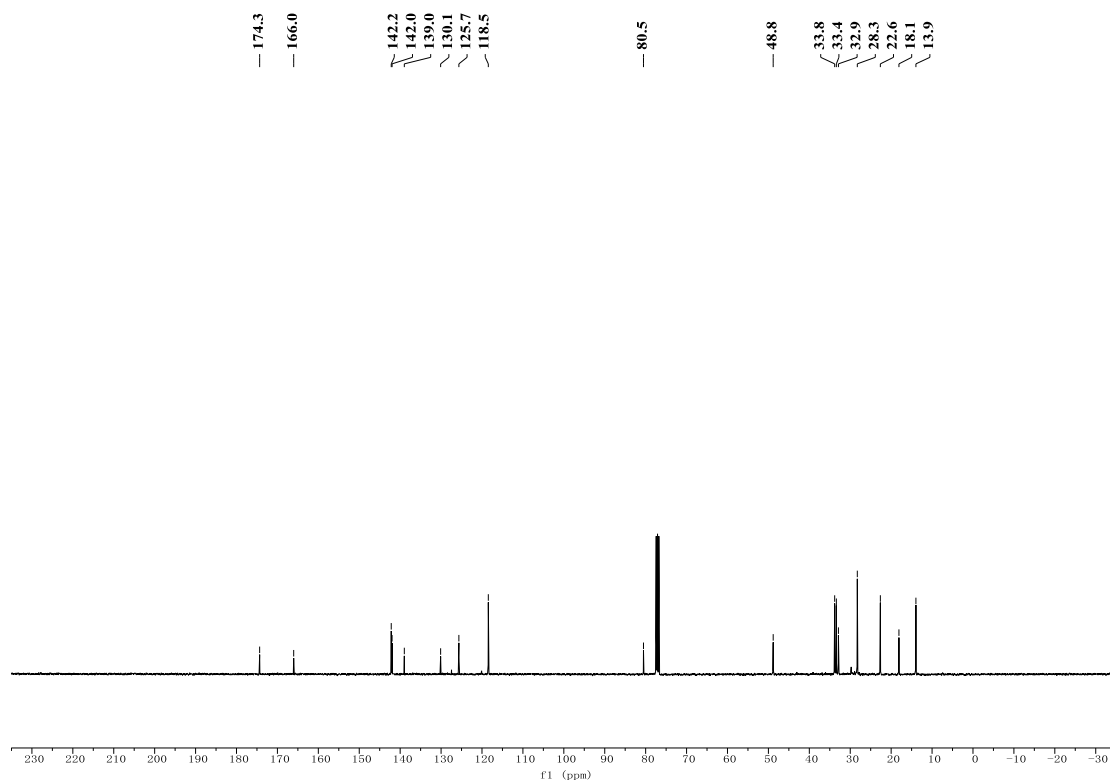

$^1\text{H}$  NMR of **4an** (400 MHz,  $\text{CDCl}_3$ )

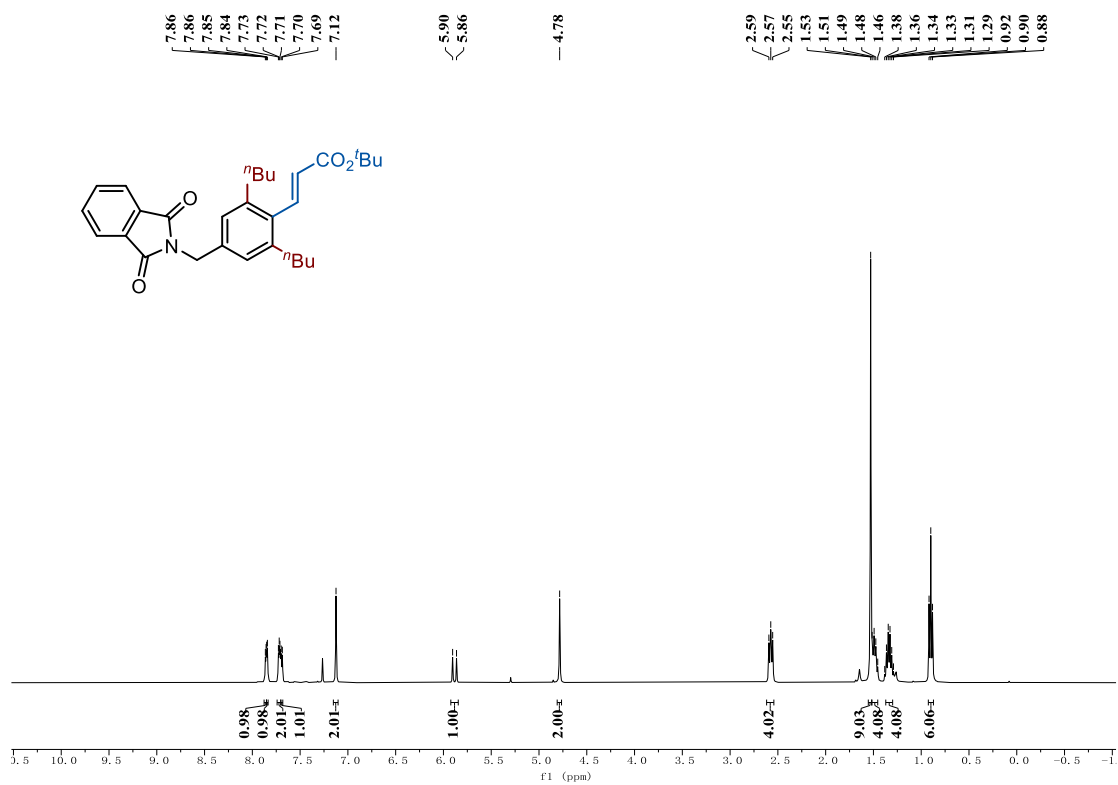

$^{13}\text{C}$  NMR of **4an** (100 MHz,  $\text{CDCl}_3$ )

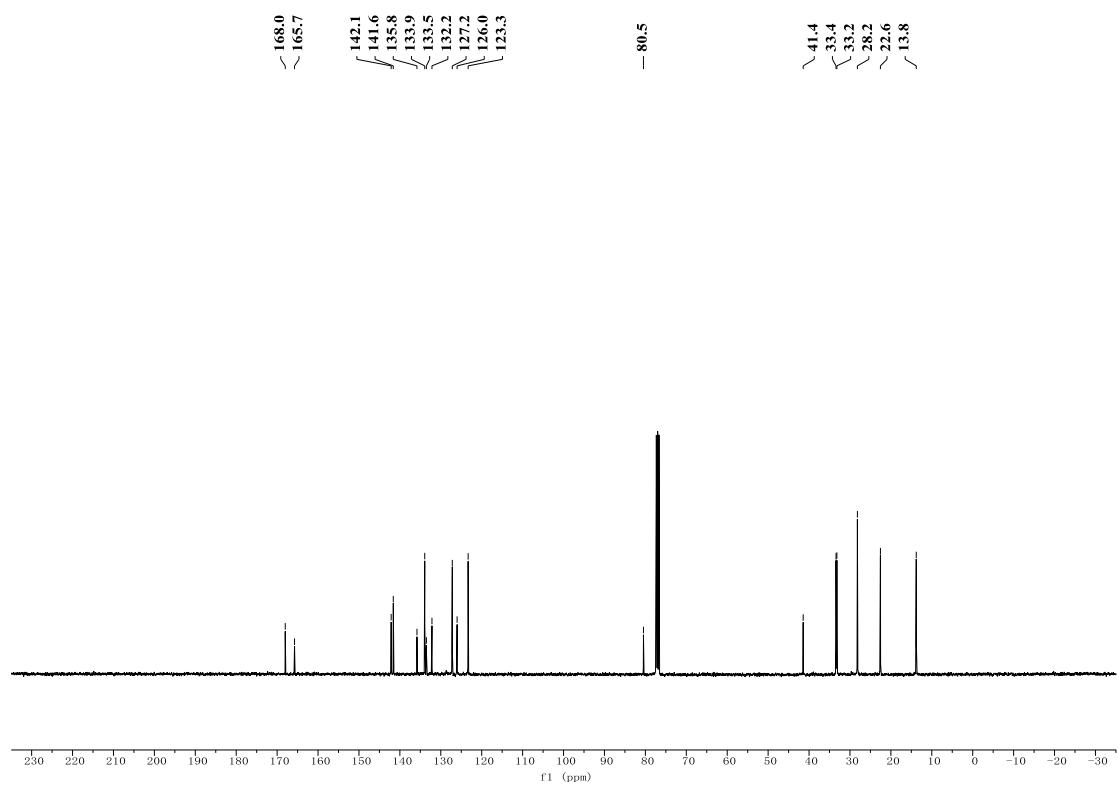

$^1\text{H}$  NMR of **4ao** (400 MHz,  $\text{CDCl}_3$ )

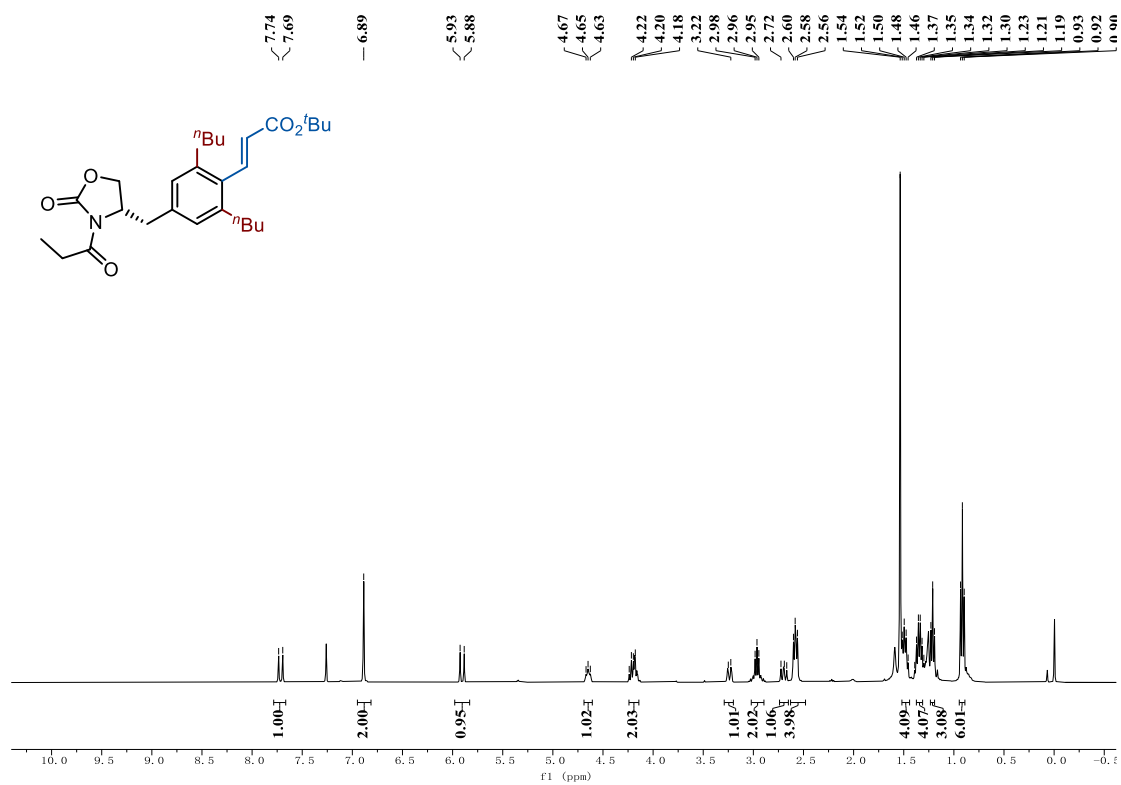

$^{13}\text{C}$  NMR of **4ao** (100 MHz,  $\text{CDCl}_3$ )

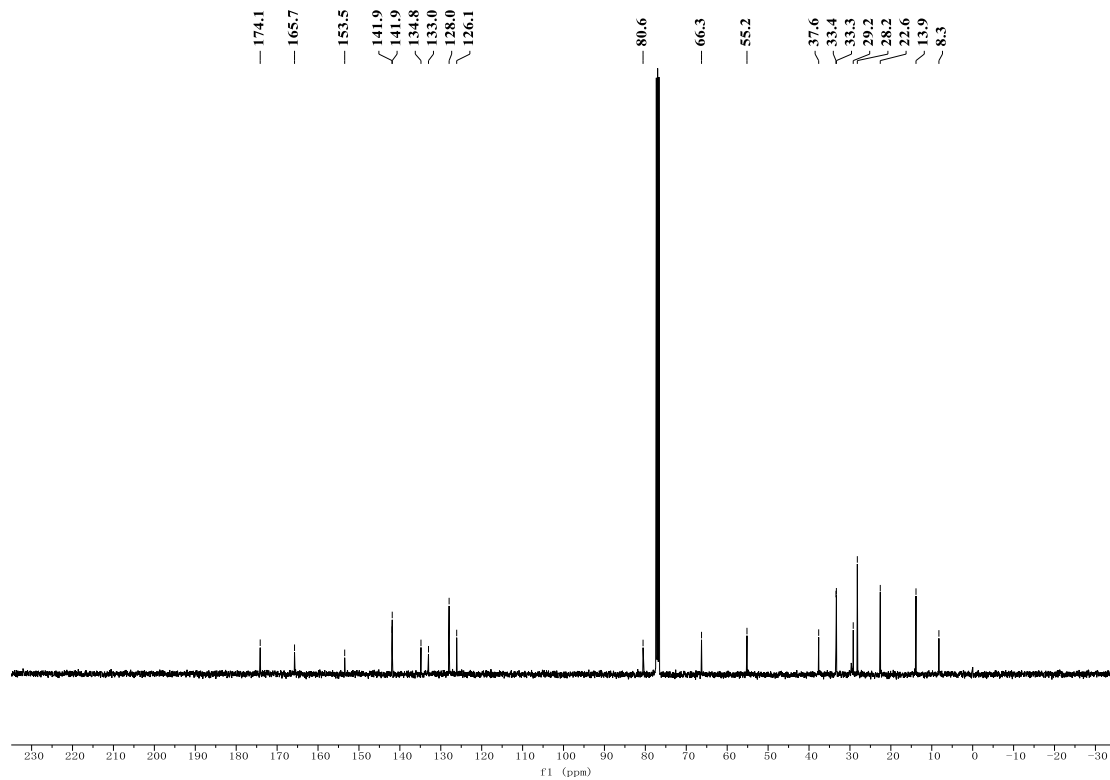

$^1\text{H}$  NMR of **4ap** (400 MHz,  $\text{CDCl}_3$ )

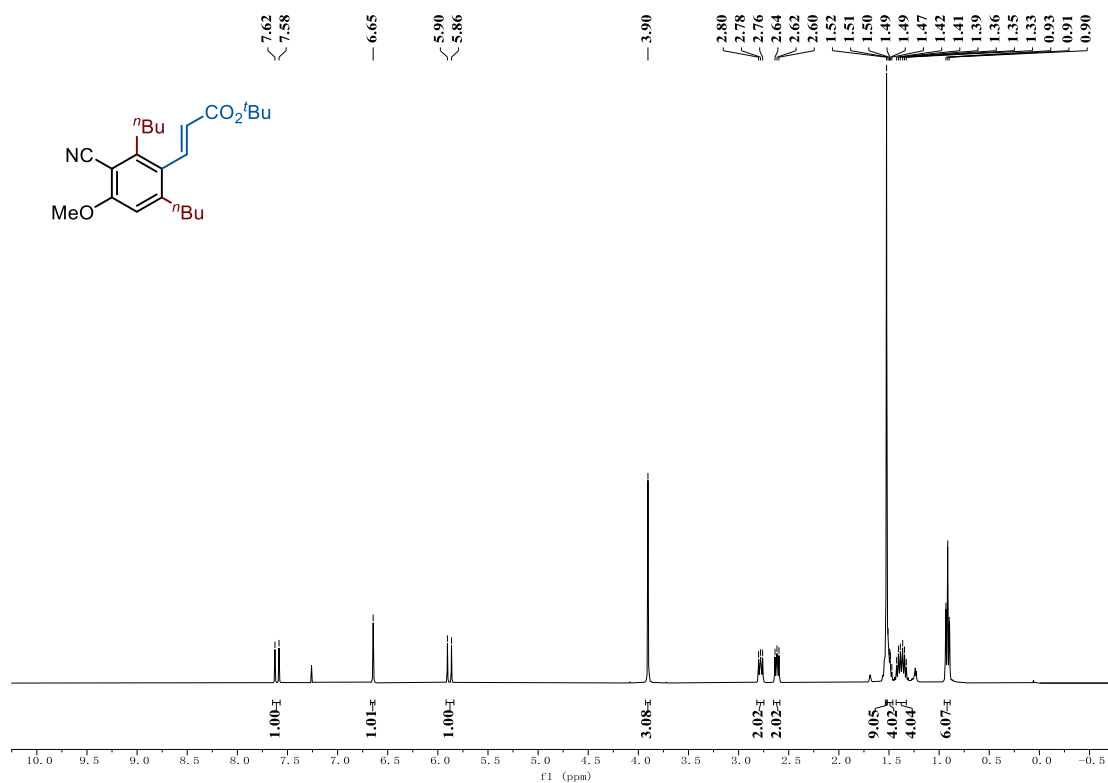

$^{13}\text{C}$  NMR of **4ap** (100 MHz,  $\text{CDCl}_3$ )

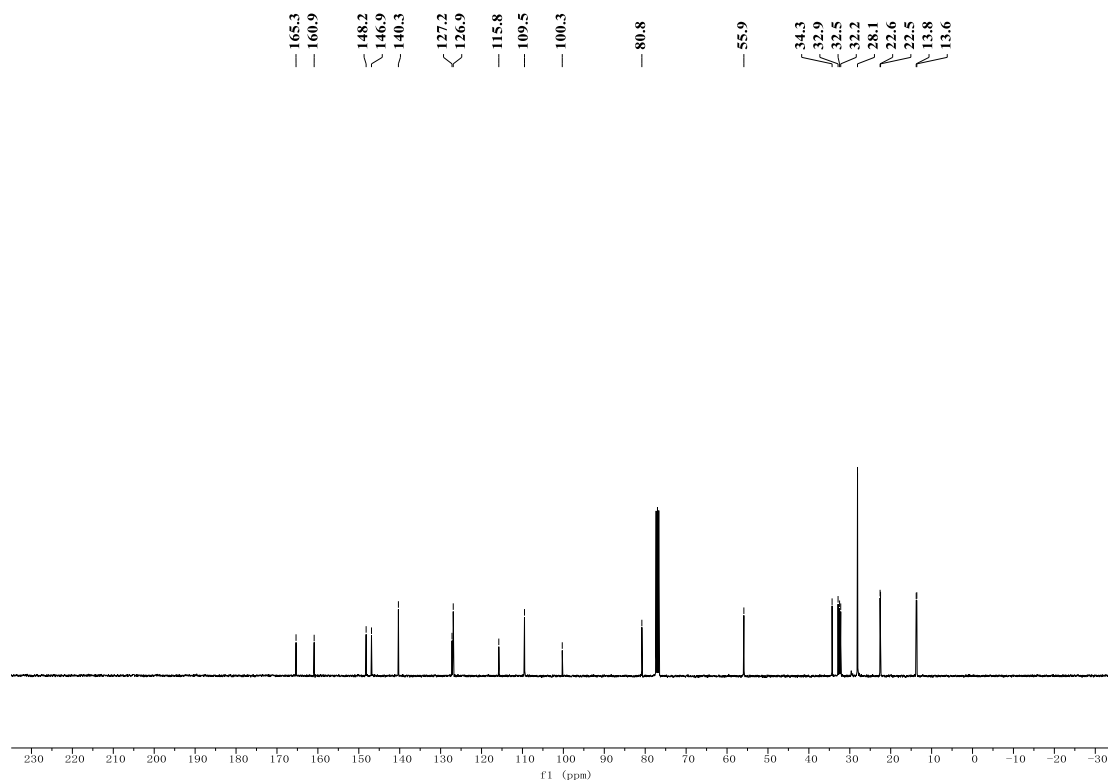

$^1\text{H}$  NMR of **4aq** (400 MHz,  $\text{CDCl}_3$ )

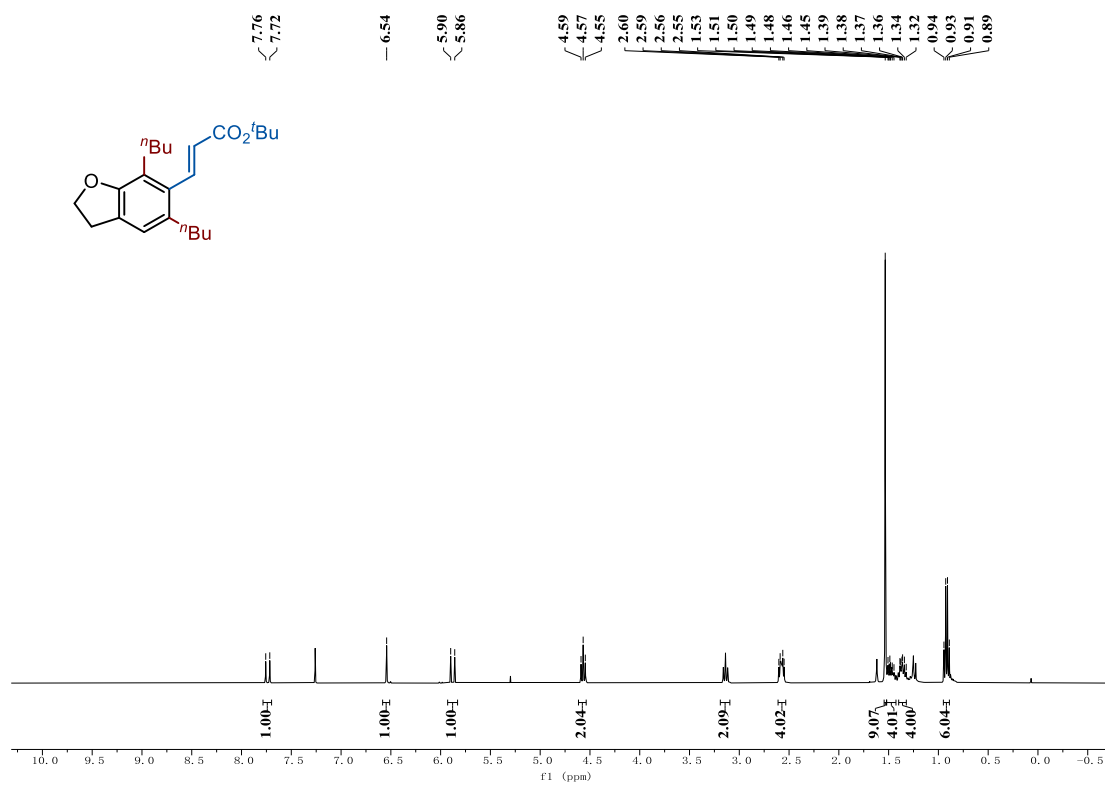

$^{13}\text{C}$  NMR of **4aq** (100 MHz,  $\text{CDCl}_3$ )

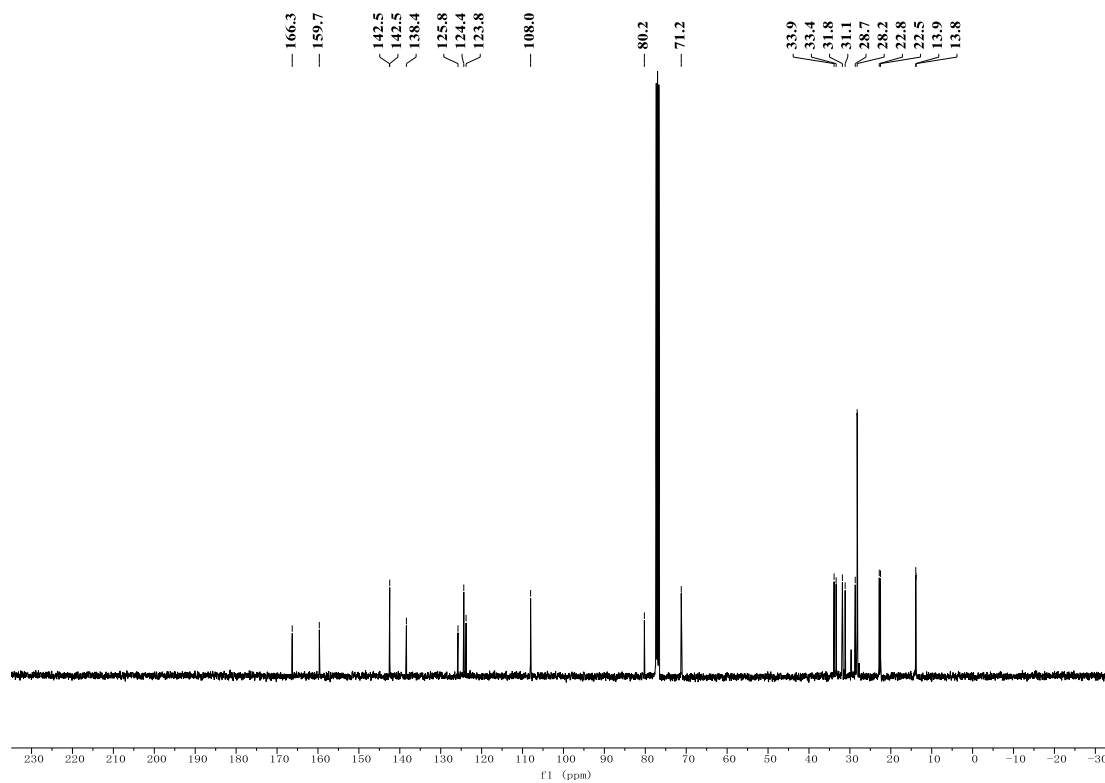

$^1\text{H}$  NMR of **4ar** (400 MHz,  $\text{CDCl}_3$ )

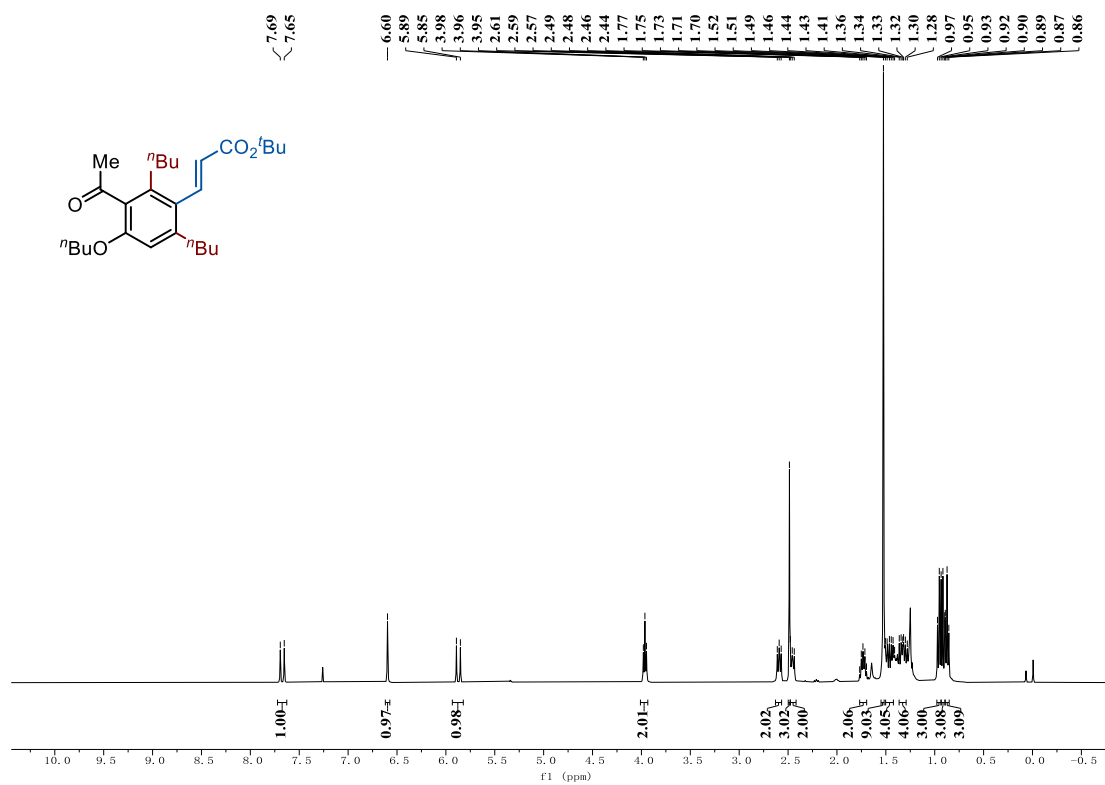

$^{13}\text{C}$  NMR of **4ar** (100 MHz,  $\text{CDCl}_3$ )

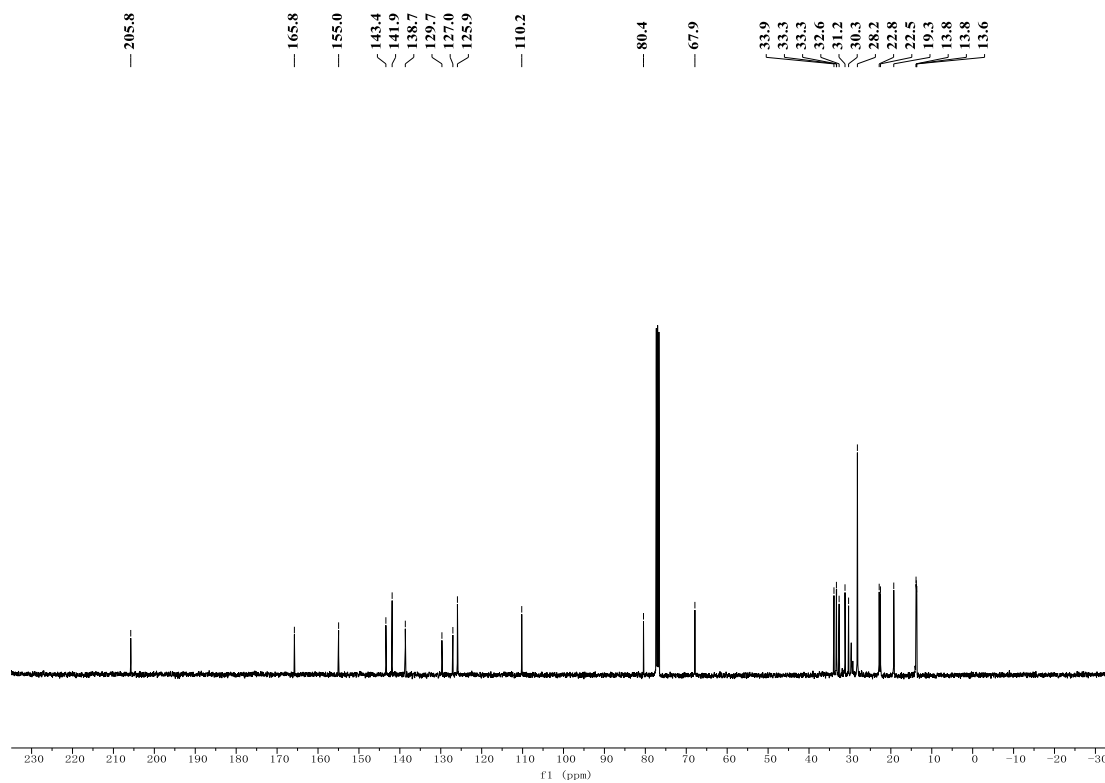

$^1\text{H}$  NMR of **4aa'** (400 MHz,  $\text{CDCl}_3$ )

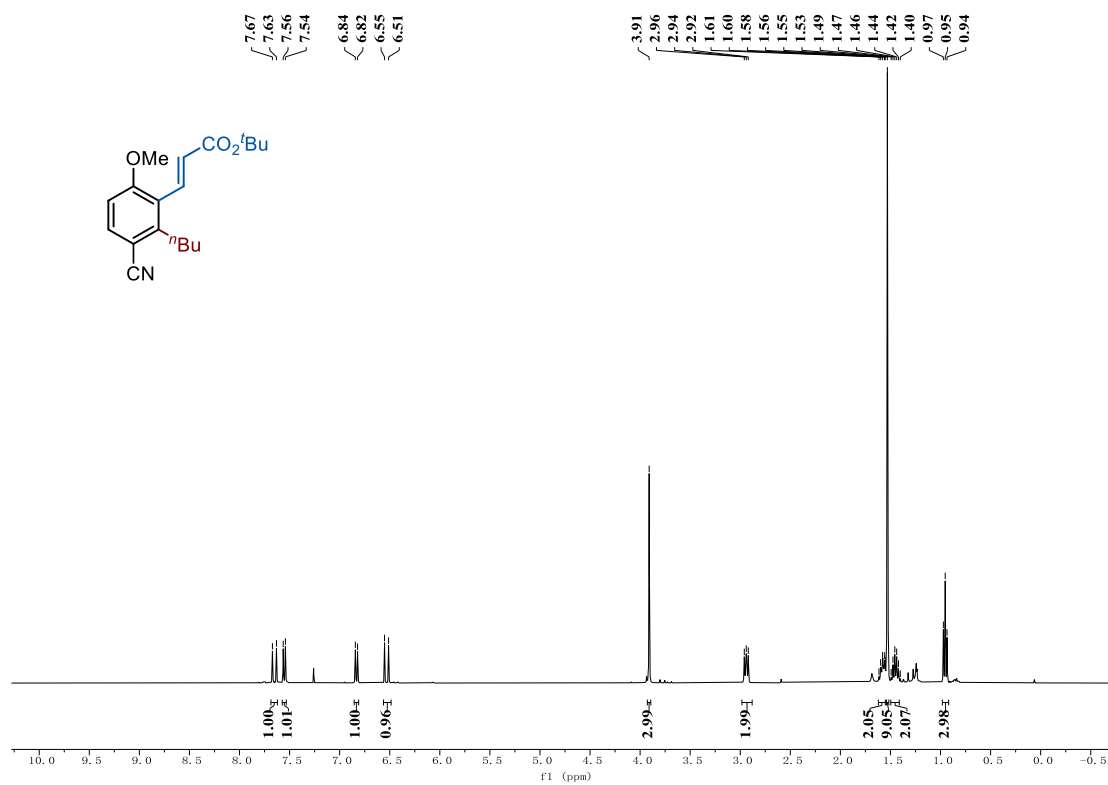

$^{13}\text{C}$  NMR of **4aa'** (100 MHz,  $\text{CDCl}_3$ )

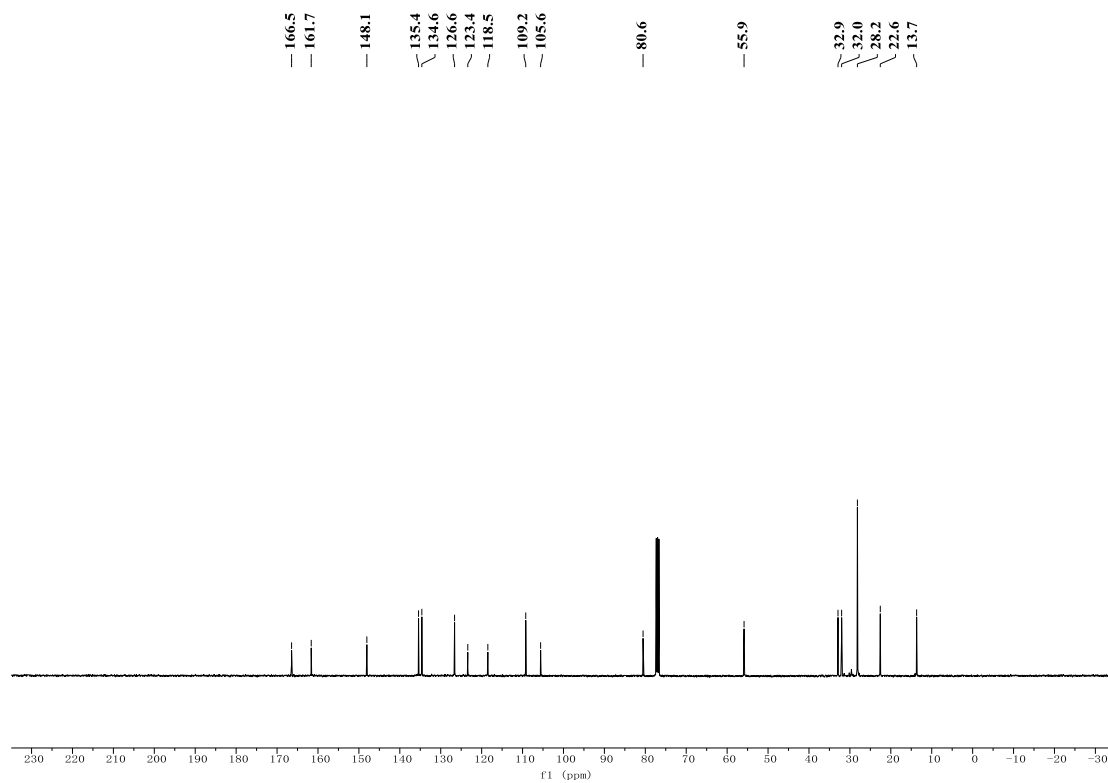

$^1\text{H}$  NMR of **4ab'** (400 MHz,  $\text{CDCl}_3$ )

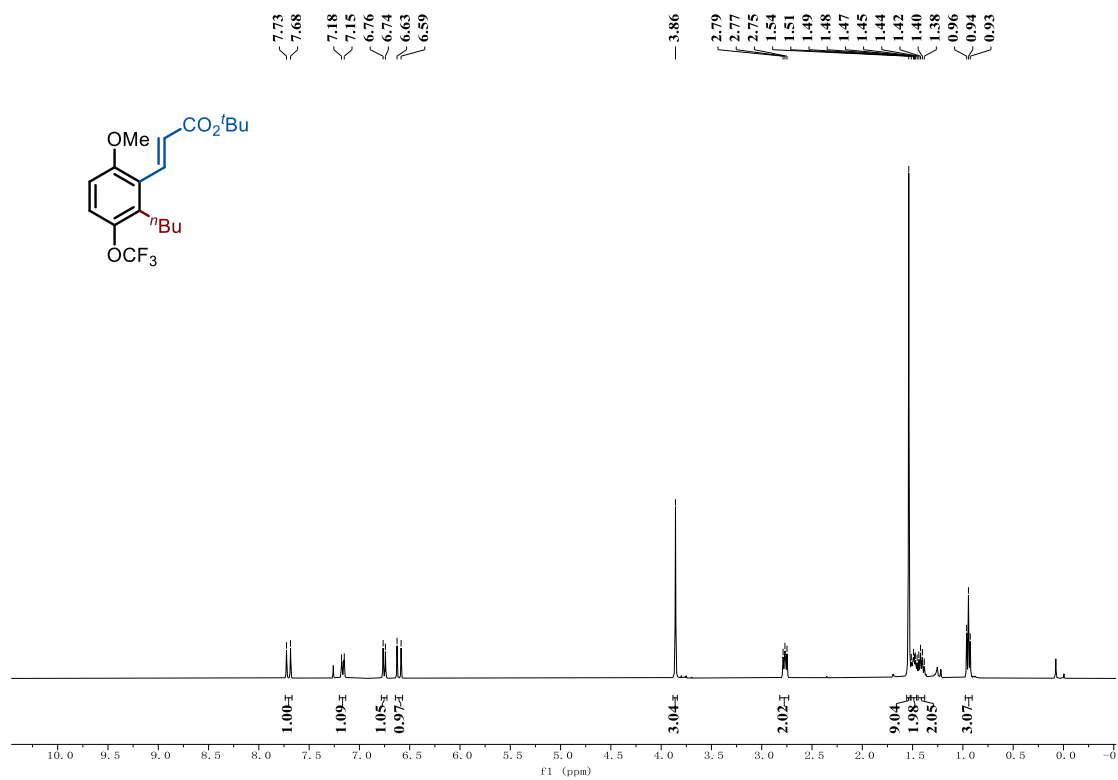

$^{13}\text{C}$  NMR of **4ab'** (100 MHz,  $\text{CDCl}_3$ )

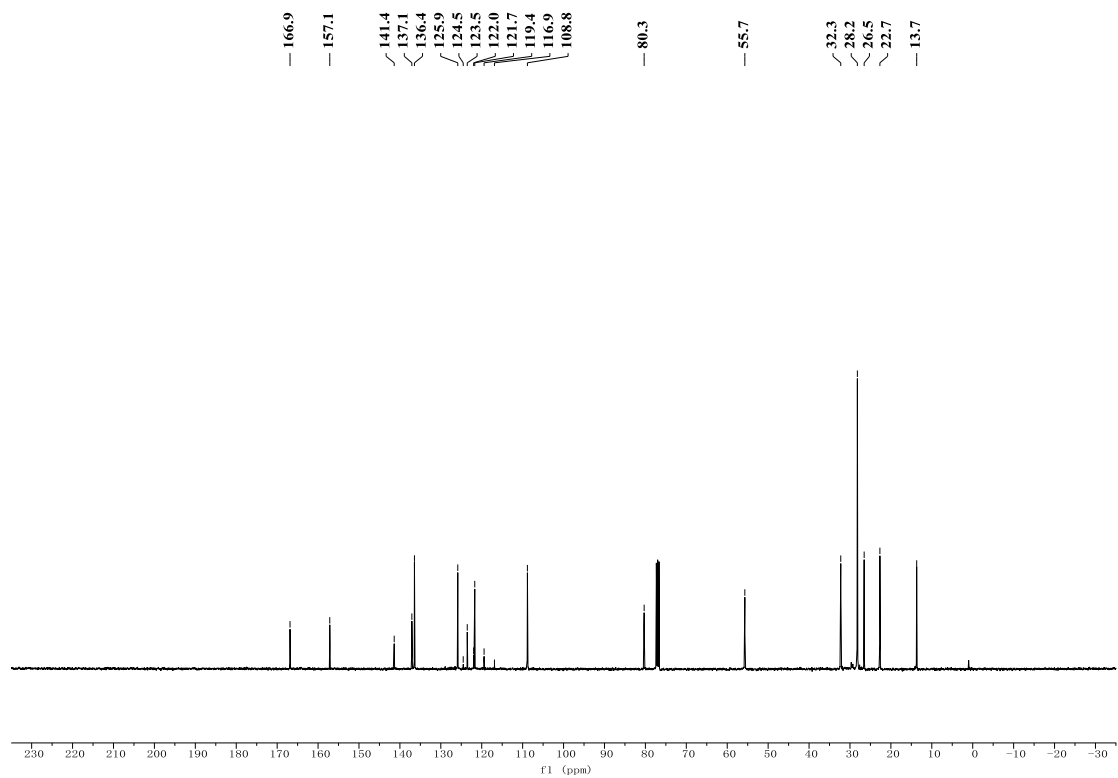



$^{19}\text{F}$  NMR of **4ab'** (400 MHz,  $\text{CDCl}_3$ )

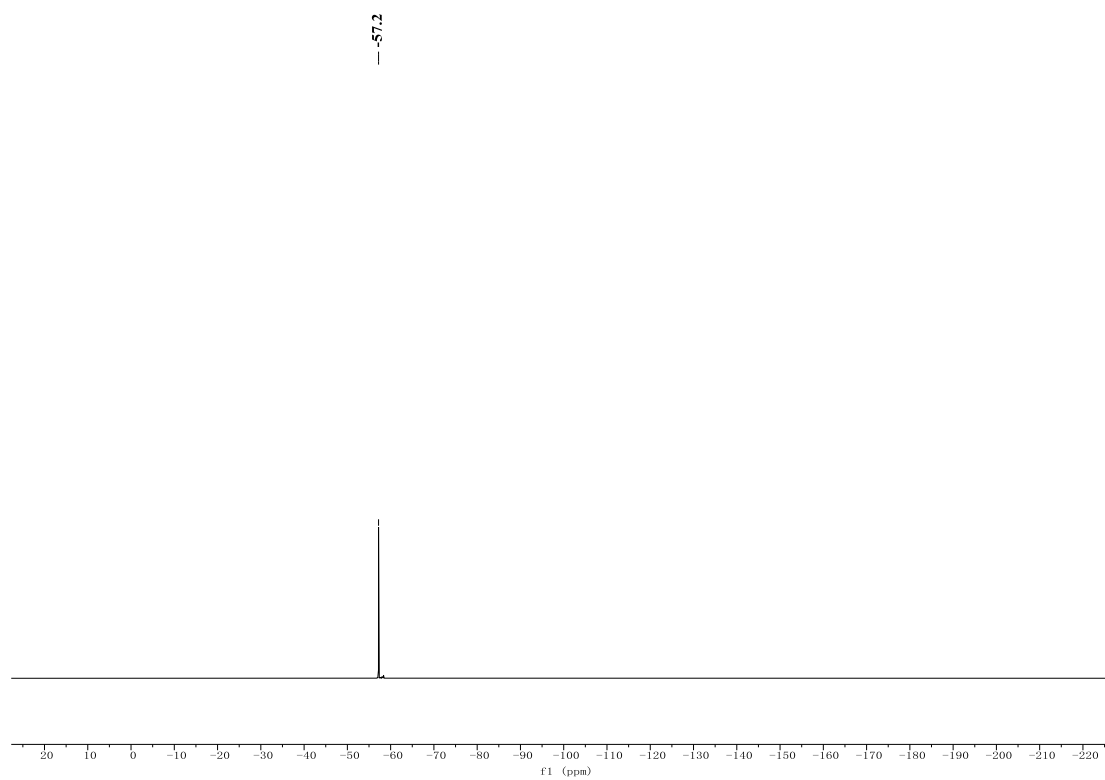

$^1\text{H}$  NMR of **4ac'** (400 MHz,  $\text{CDCl}_3$ )

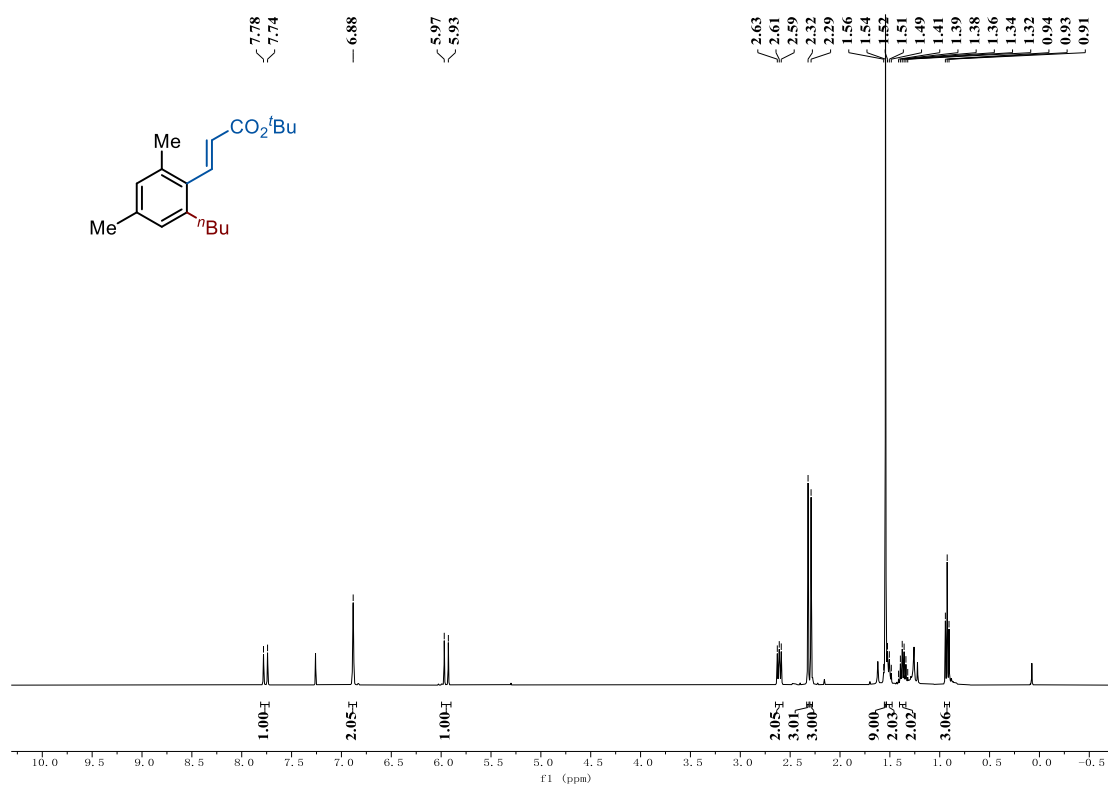

$^{13}\text{C}$  NMR of **4ac'** (100 MHz,  $\text{CDCl}_3$ )

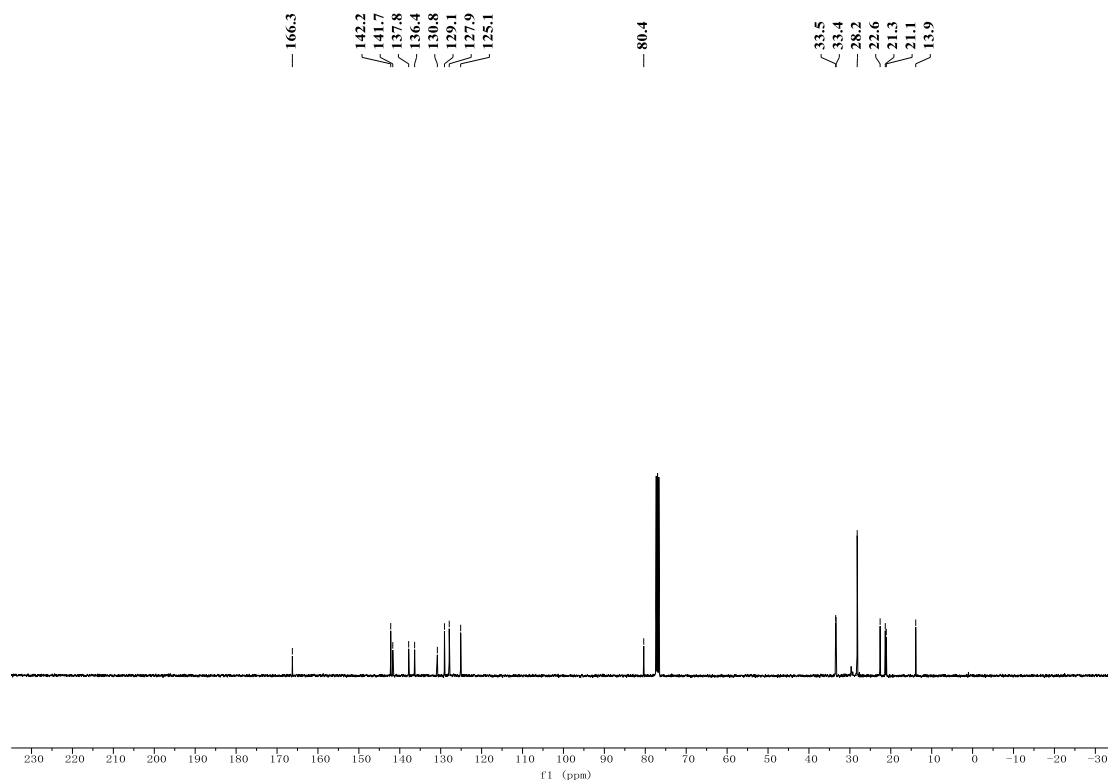

<sup>1</sup>H NMR of **4ba** (400 MHz, CDCl<sub>3</sub>)

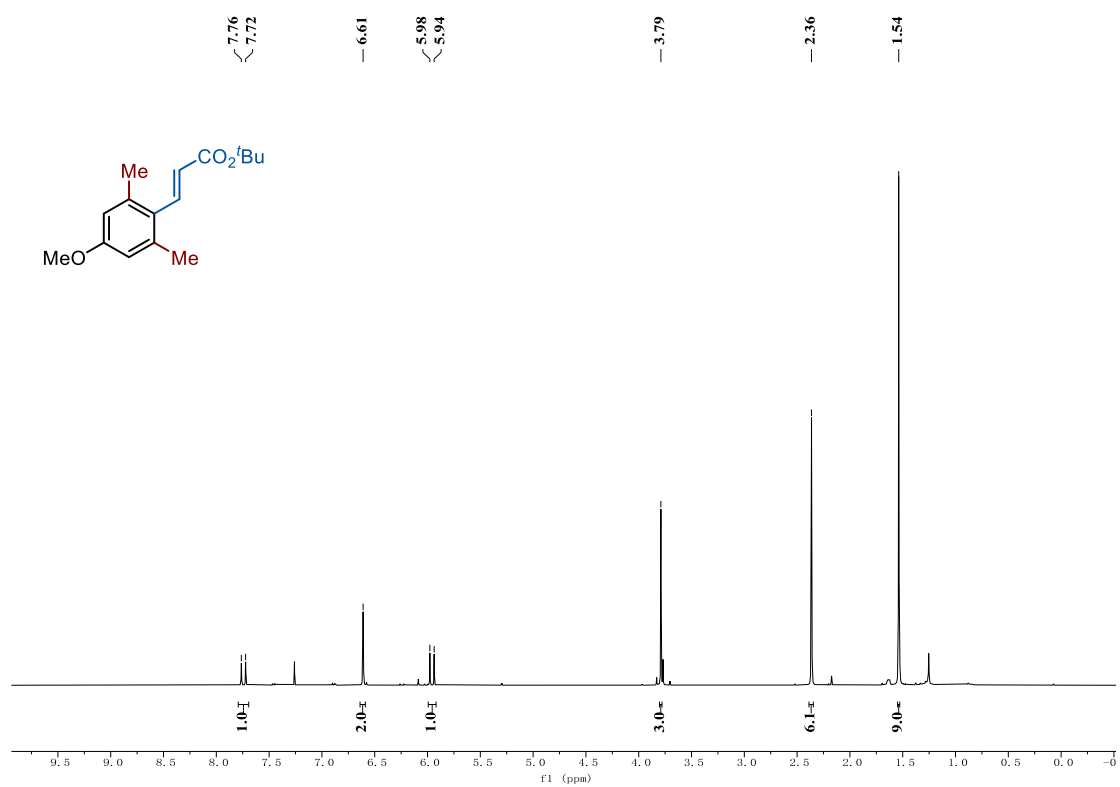

<sup>13</sup>C NMR of **4ba** (100 MHz, CDCl<sub>3</sub>)

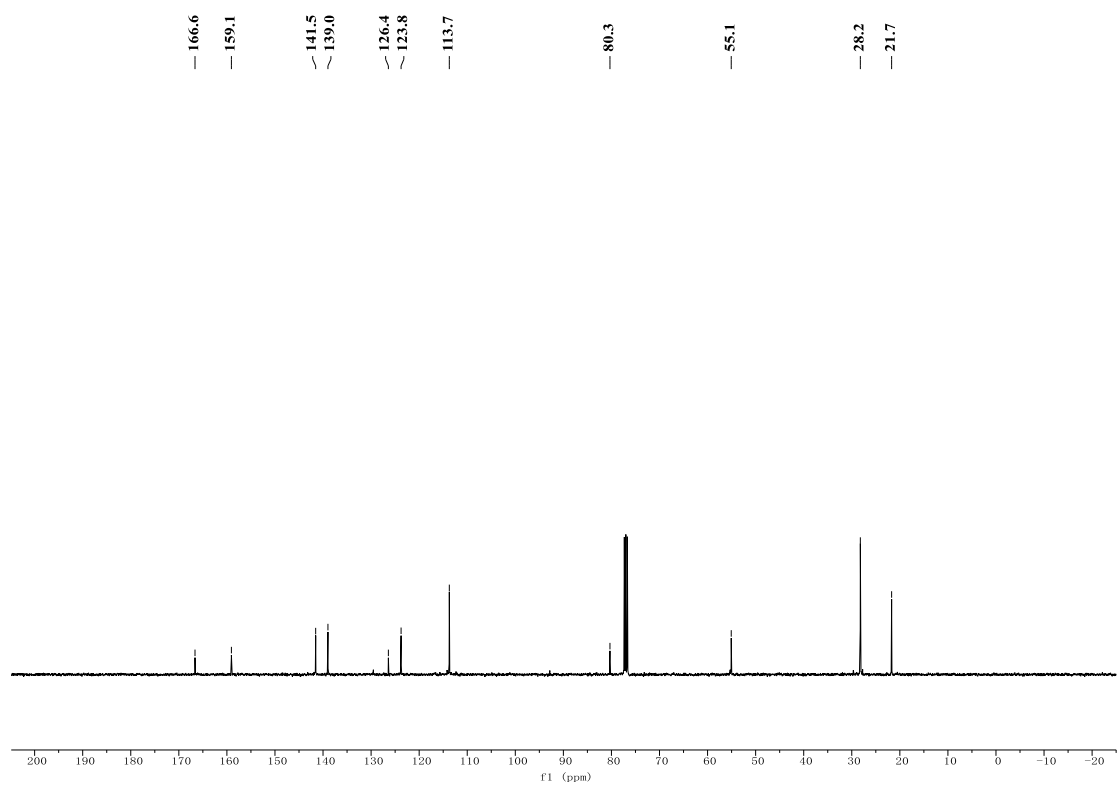

$^1\text{H}$  NMR of **4bb** (400 MHz,  $\text{CDCl}_3$ )

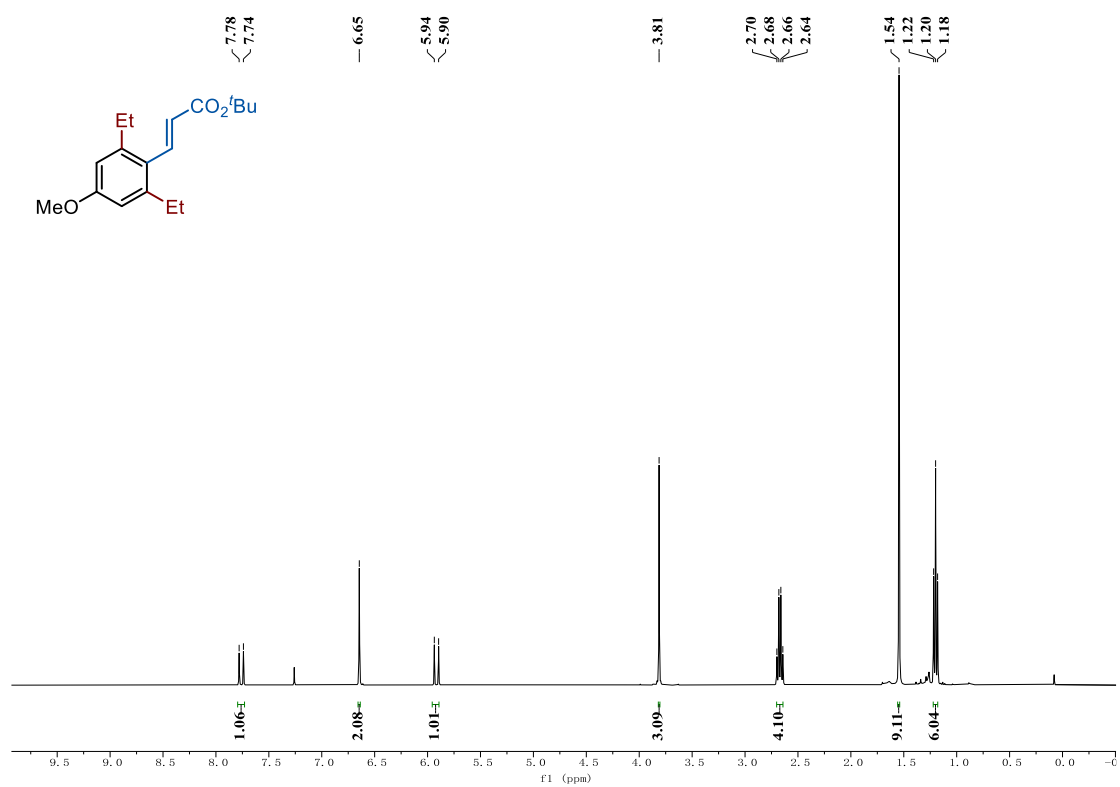

$^{13}\text{C}$  NMR of **4bb** (100 MHz,  $\text{CDCl}_3$ )

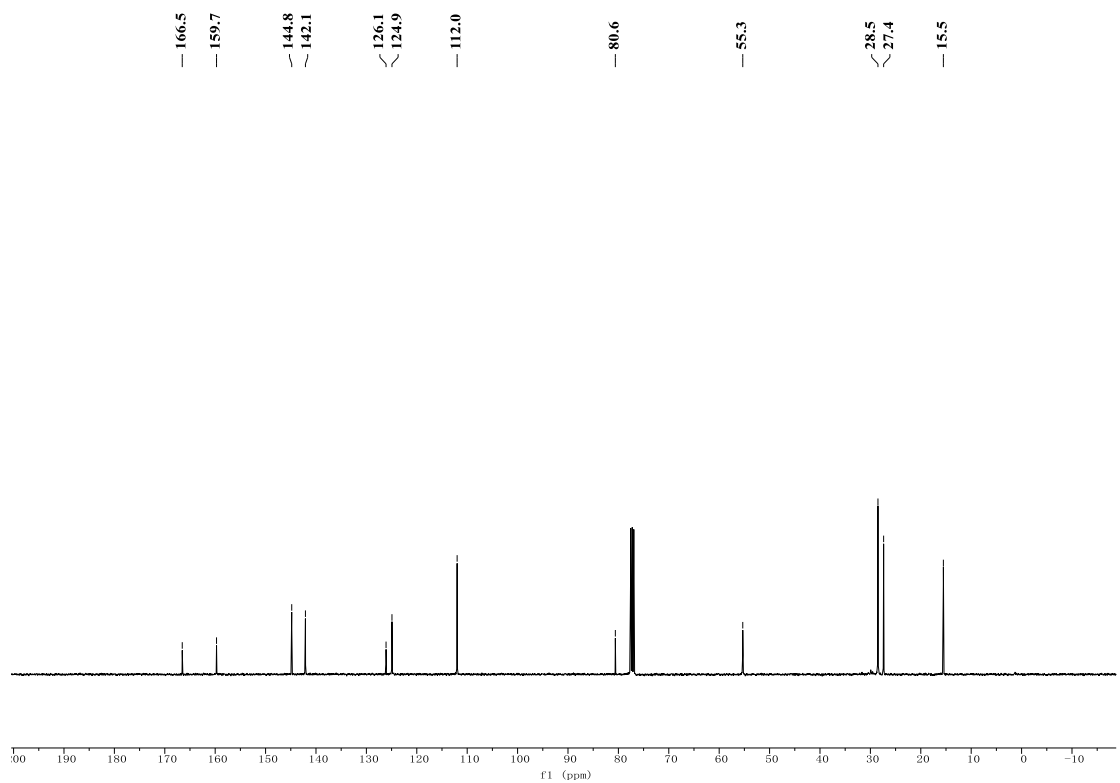

$^1\text{H}$  NMR of **4bc** (400 MHz,  $\text{CDCl}_3$ )

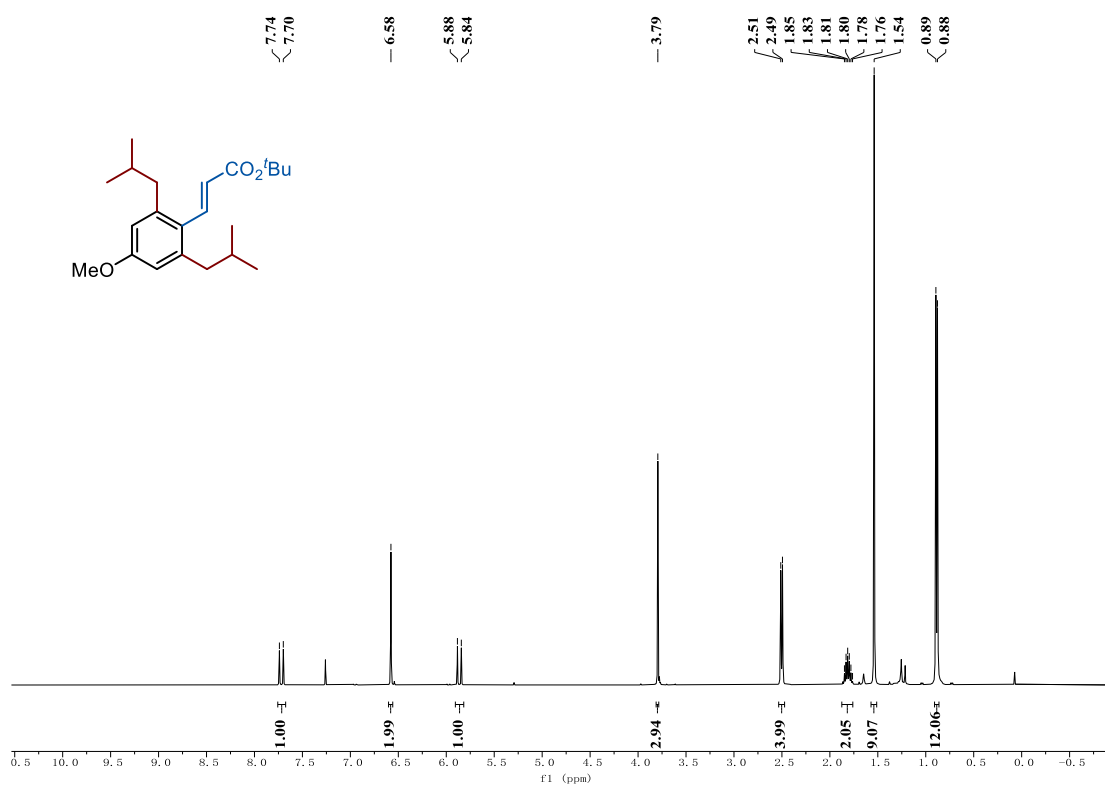

$^{13}\text{C}$  NMR of **4bc** (100 MHz,  $\text{CDCl}_3$ )

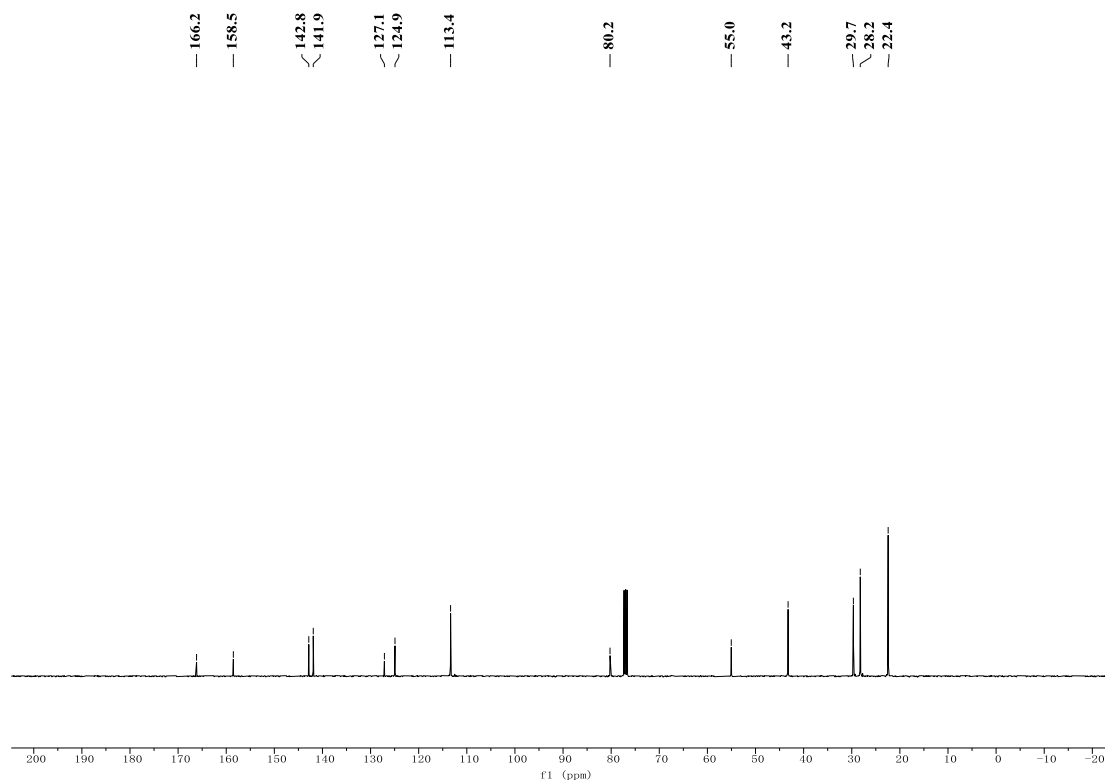

$^1\text{H}$  NMR of **4bd** (400 MHz,  $\text{CDCl}_3$ )

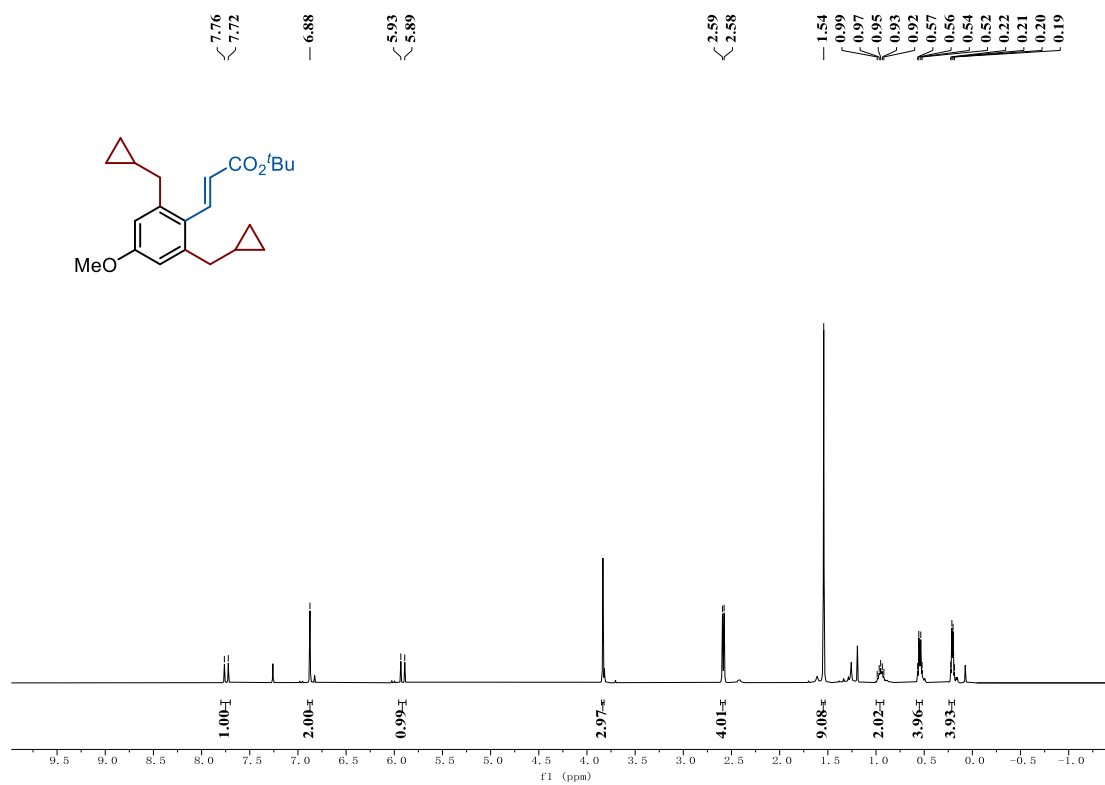

$^{13}\text{C}$  NMR of **4bd** (100 MHz,  $\text{CDCl}_3$ )

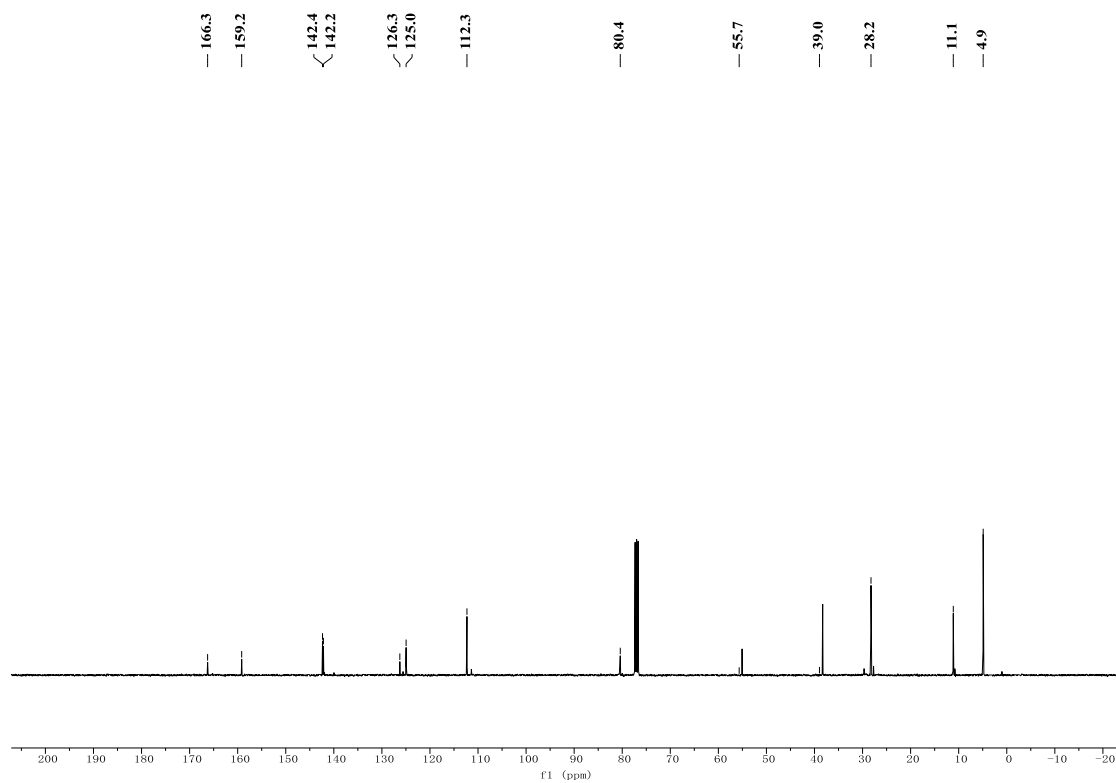

$^1\text{H}$  NMR of **4be** (400 MHz,  $\text{CDCl}_3$ )

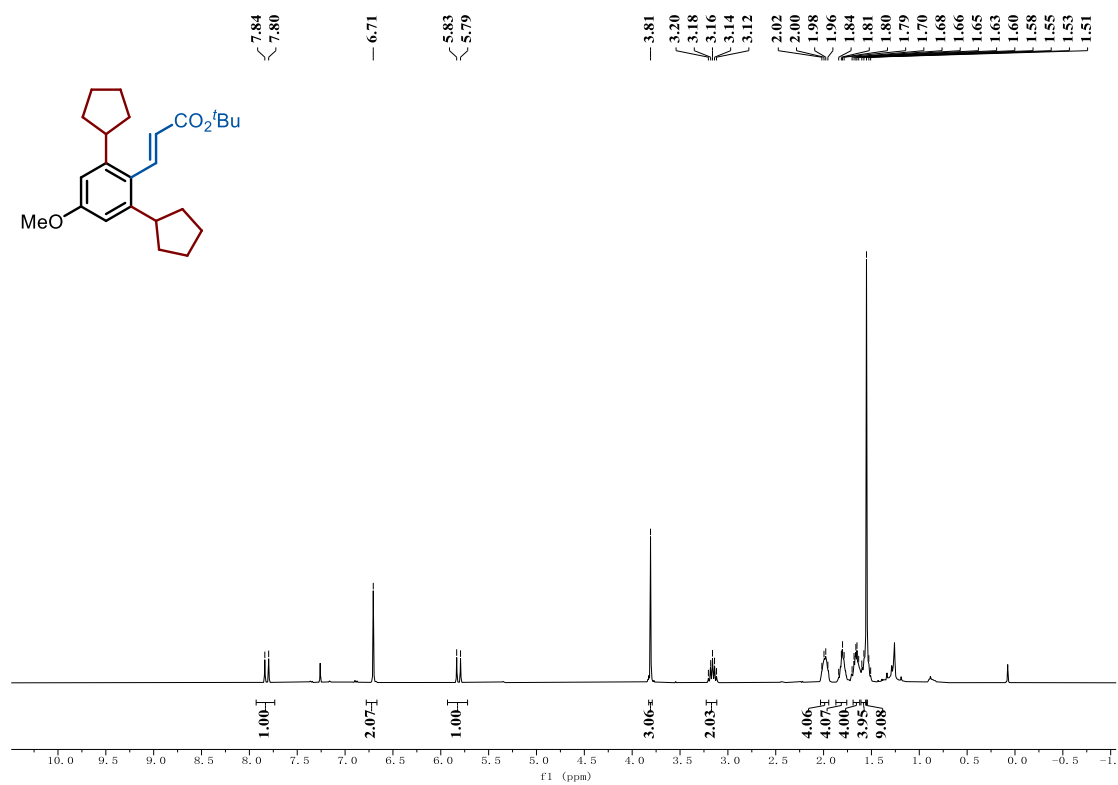

$^{13}\text{C}$  NMR of **4be** (100 MHz,  $\text{CDCl}_3$ )

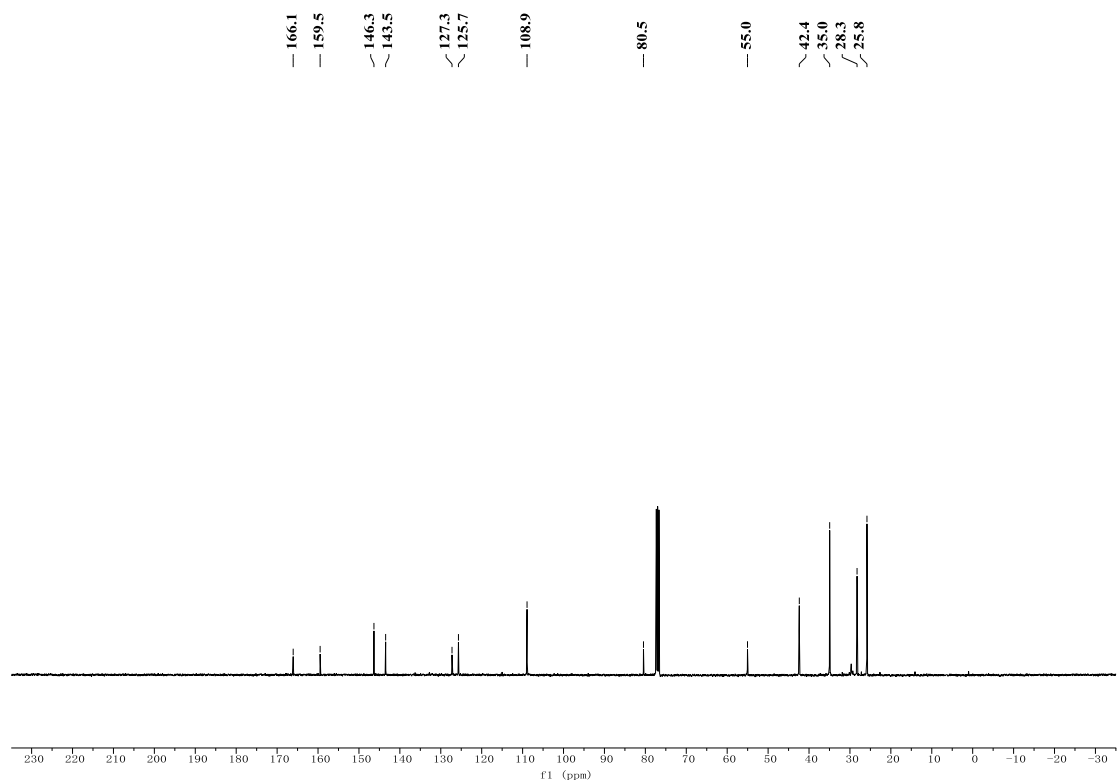

$^1\text{H}$  NMR of **4bf** (400 MHz,  $\text{CDCl}_3$ )

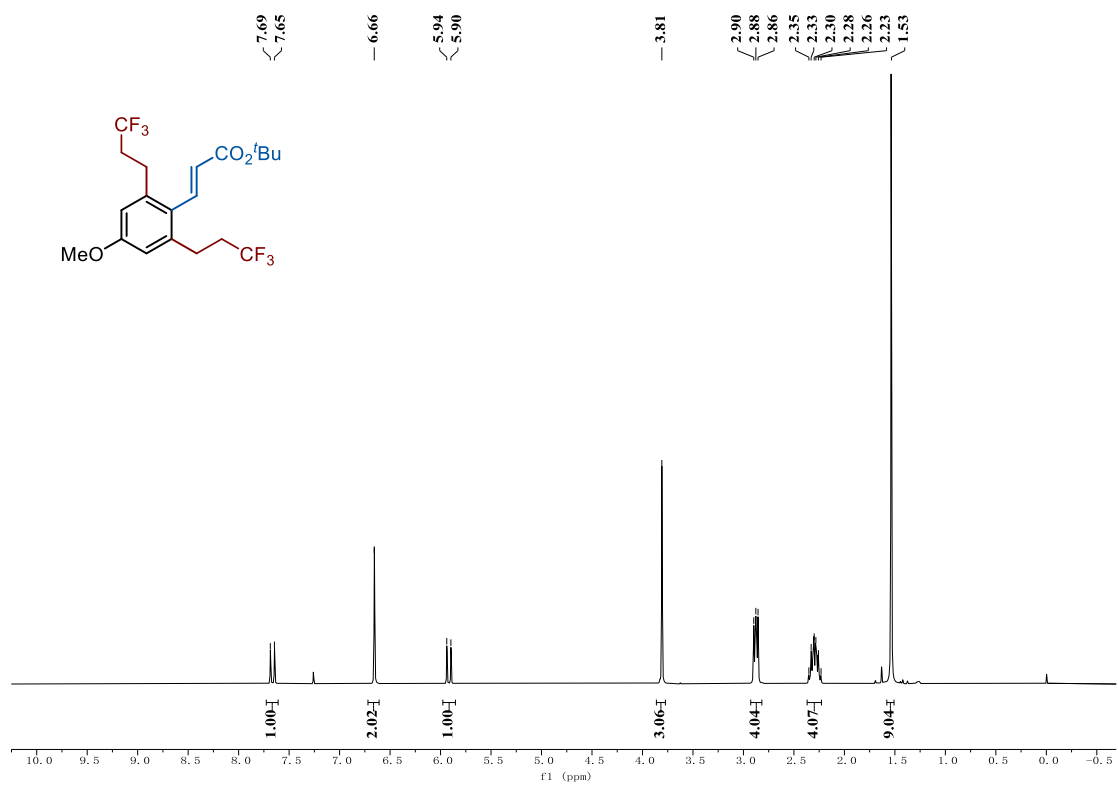

$^{13}\text{C}$  NMR of **4bf** (100 MHz,  $\text{CDCl}_3$ )

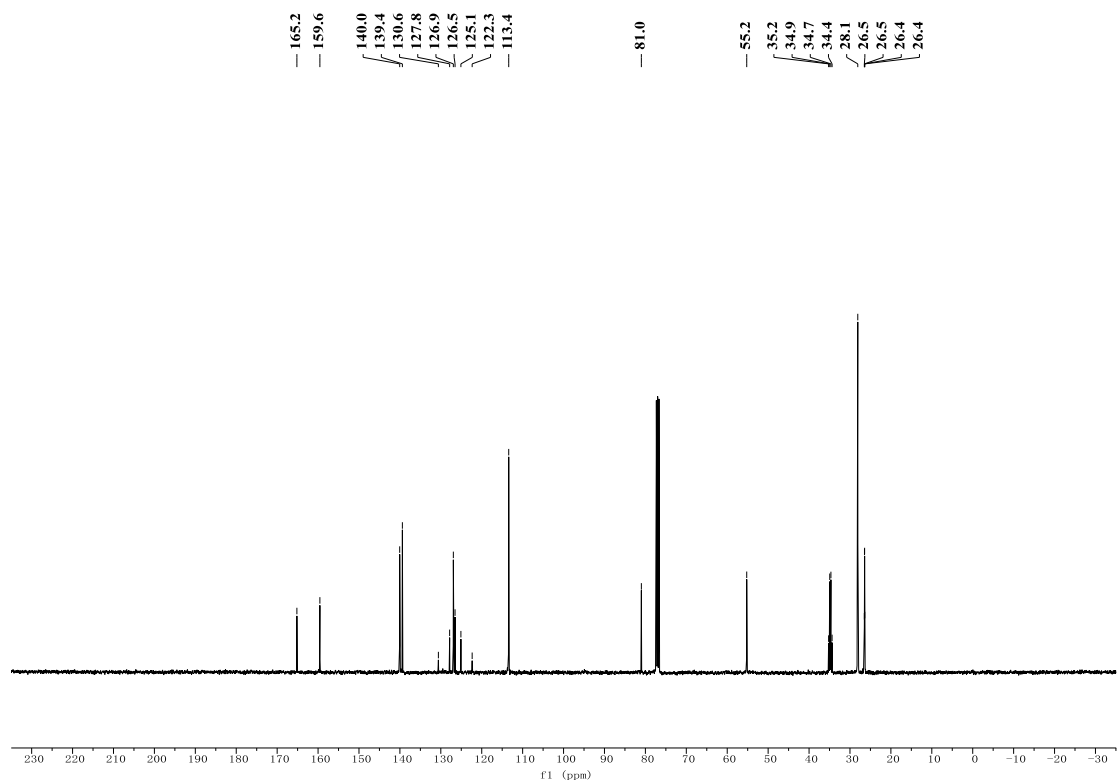



$^9\text{F}$  NMR of **4bf** (400 MHz,  $\text{CDCl}_3$ )

— 66.7

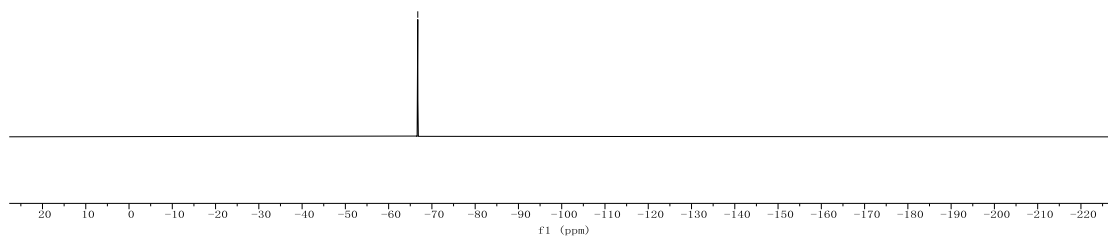

$^1\text{H}$  NMR of **4bg** (400 MHz,  $\text{CDCl}_3$ )

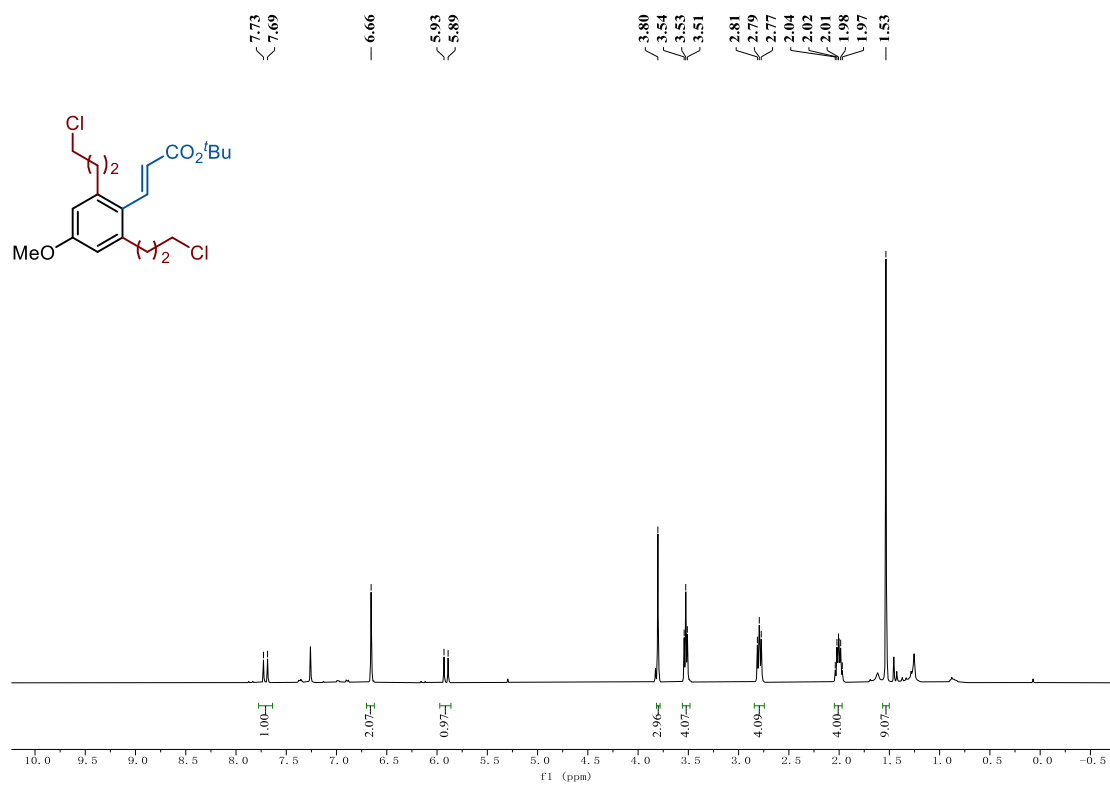

$^{13}\text{C}$  NMR of **4bg** (100 MHz,  $\text{CDCl}_3$ )

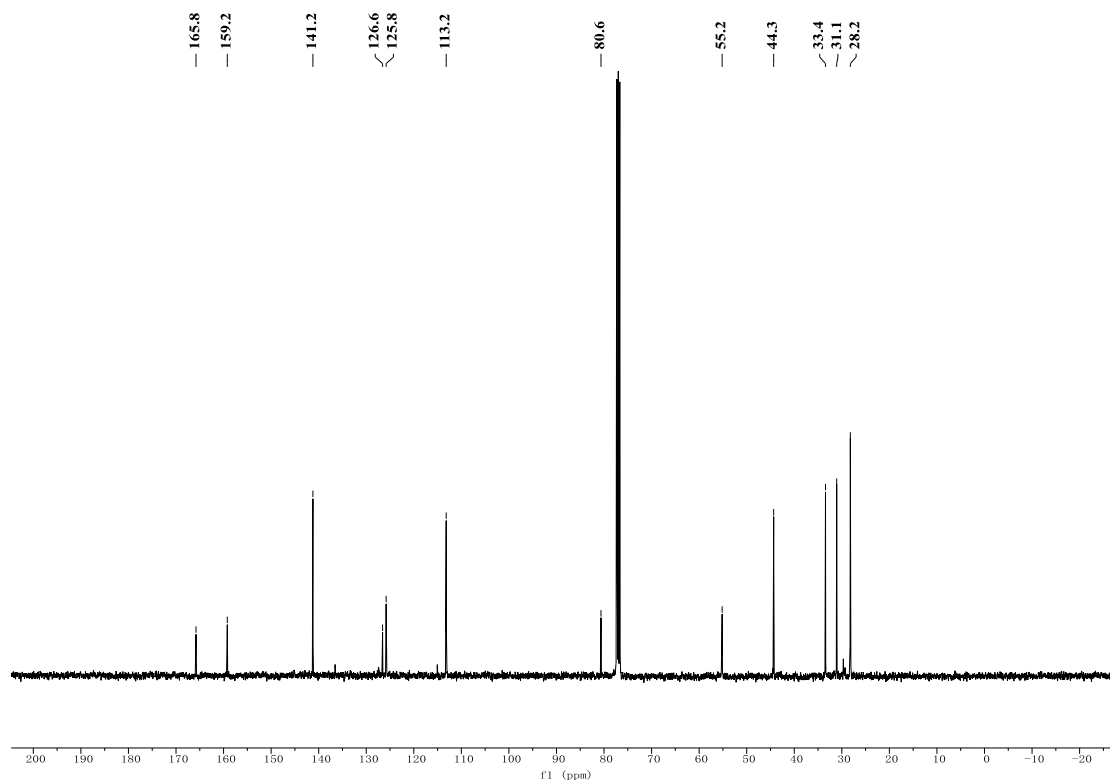

$^1\text{H}$  NMR of **4bh** (400 MHz,  $\text{CDCl}_3$ )

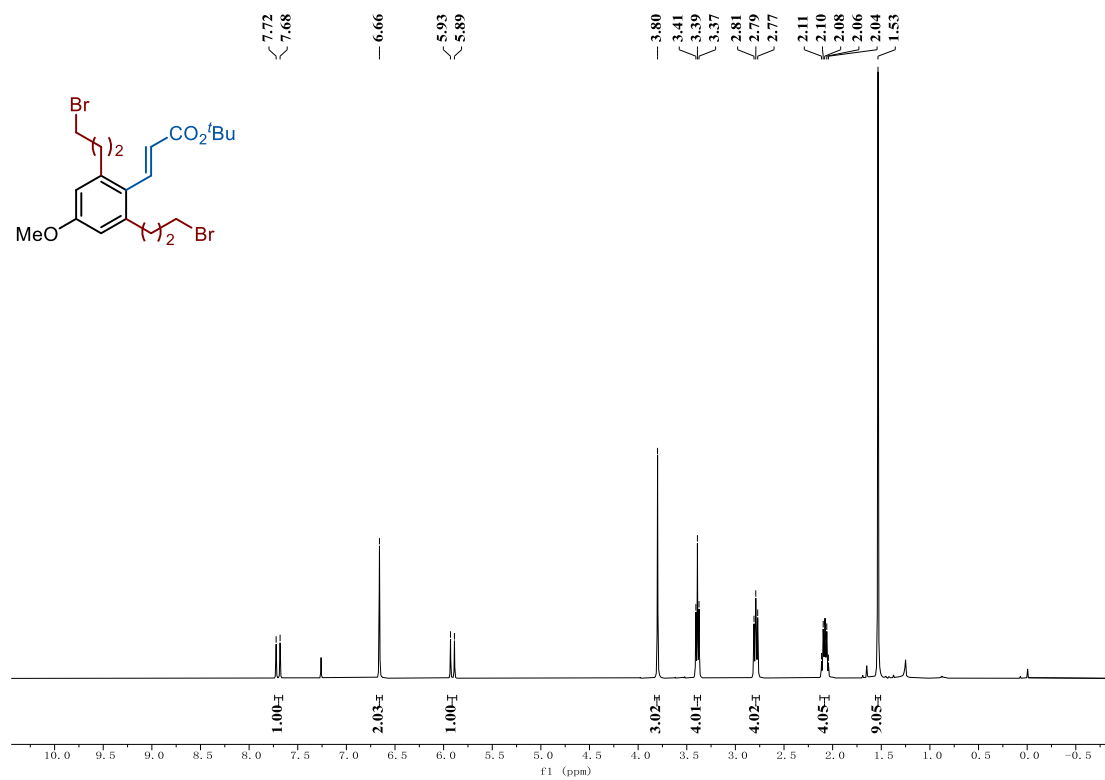

$^{13}\text{C}$  NMR of **4bh** (100 MHz,  $\text{CDCl}_3$ )

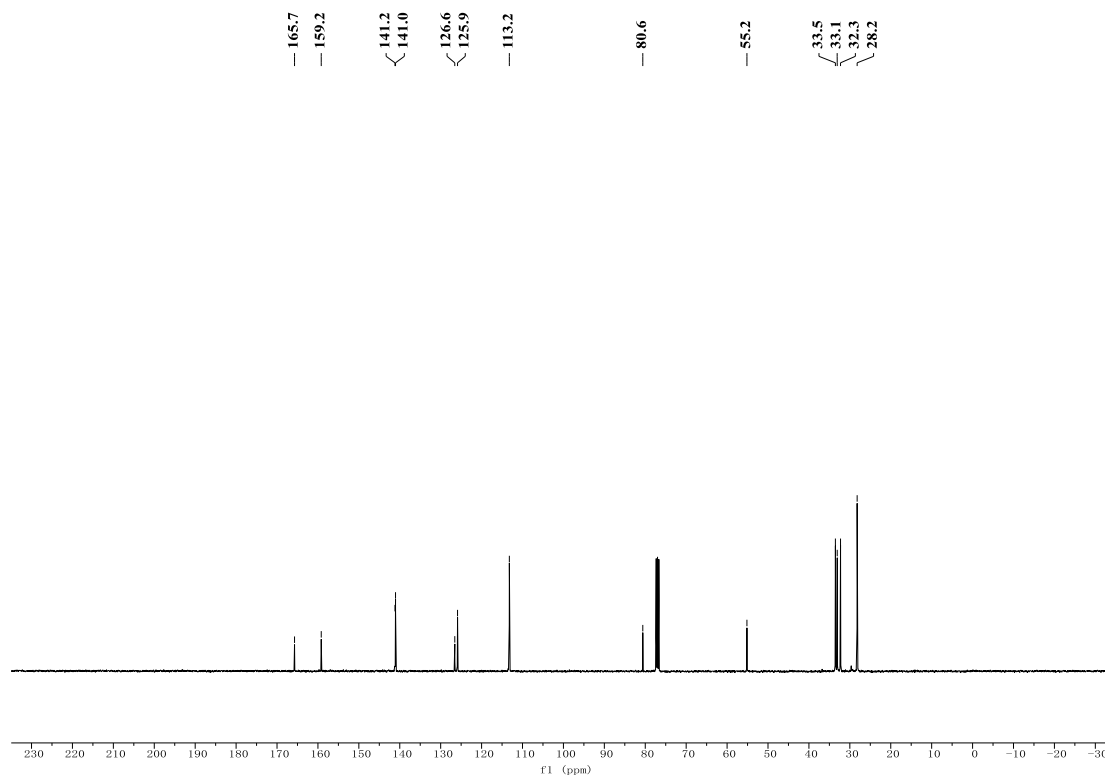

$^1\text{H}$  NMR of **4bi** (400 MHz,  $\text{CDCl}_3$ )

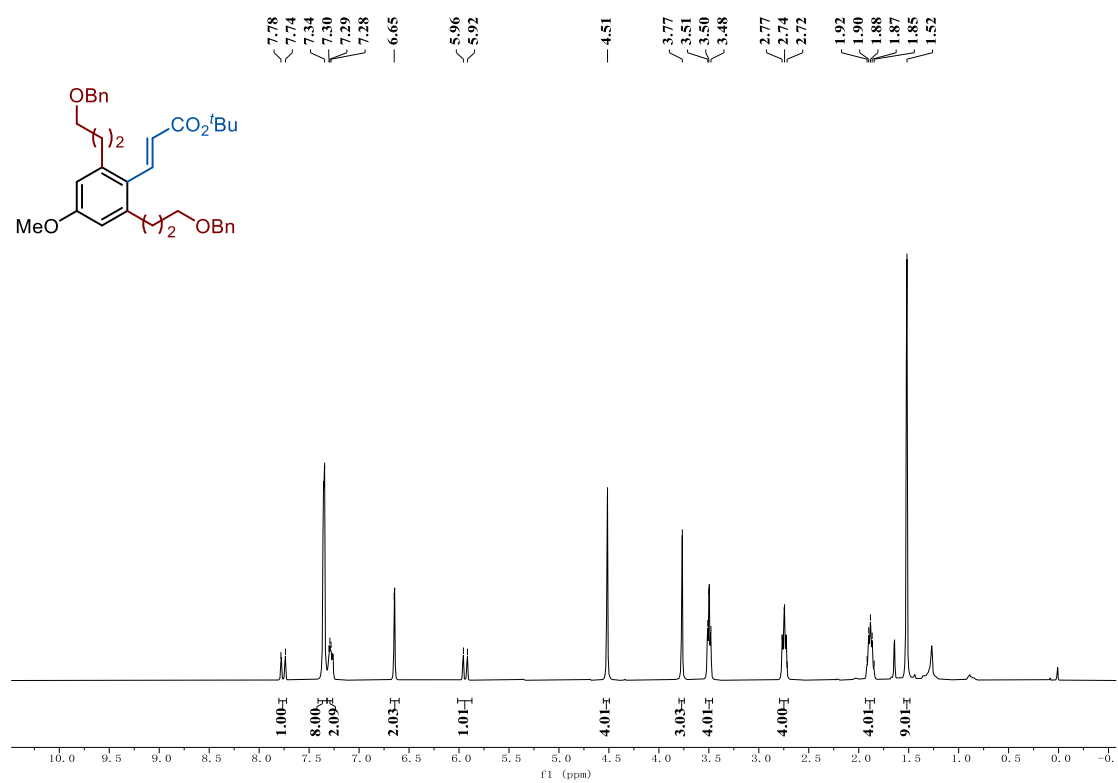

$^{13}\text{C}$  NMR of **4bi** (100 MHz,  $\text{CDCl}_3$ )

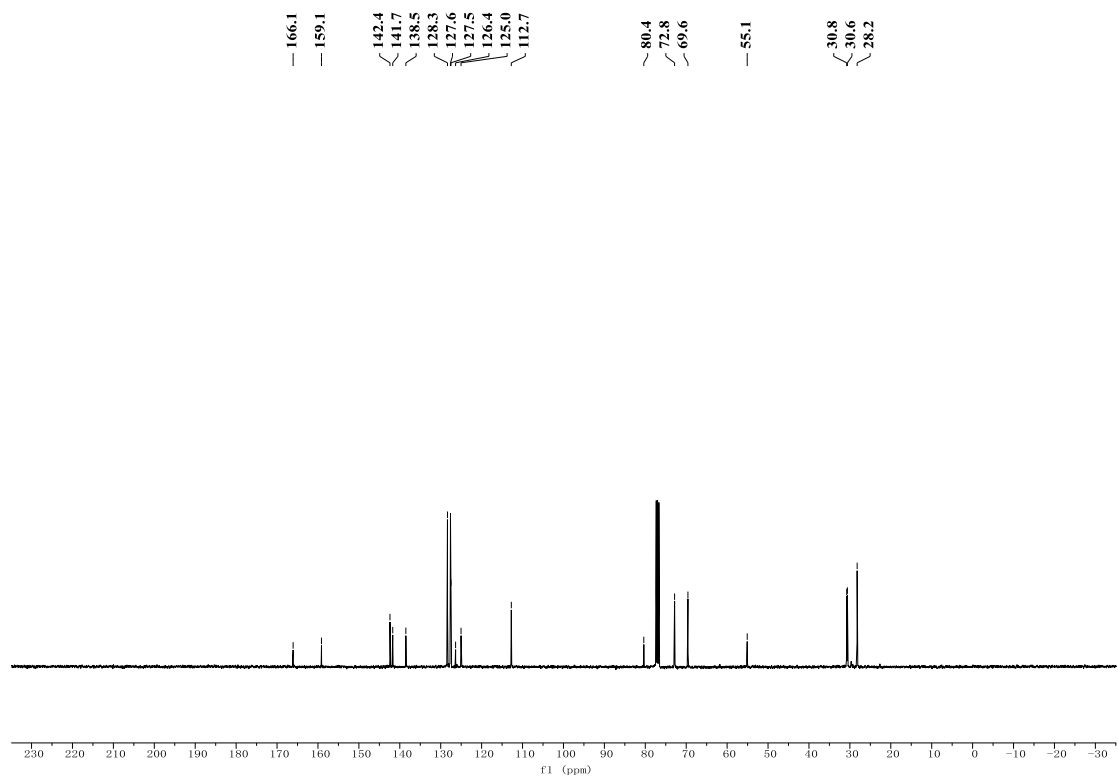

$^1\text{H}$  NMR of **4bj** (400 MHz,  $\text{CDCl}_3$ )

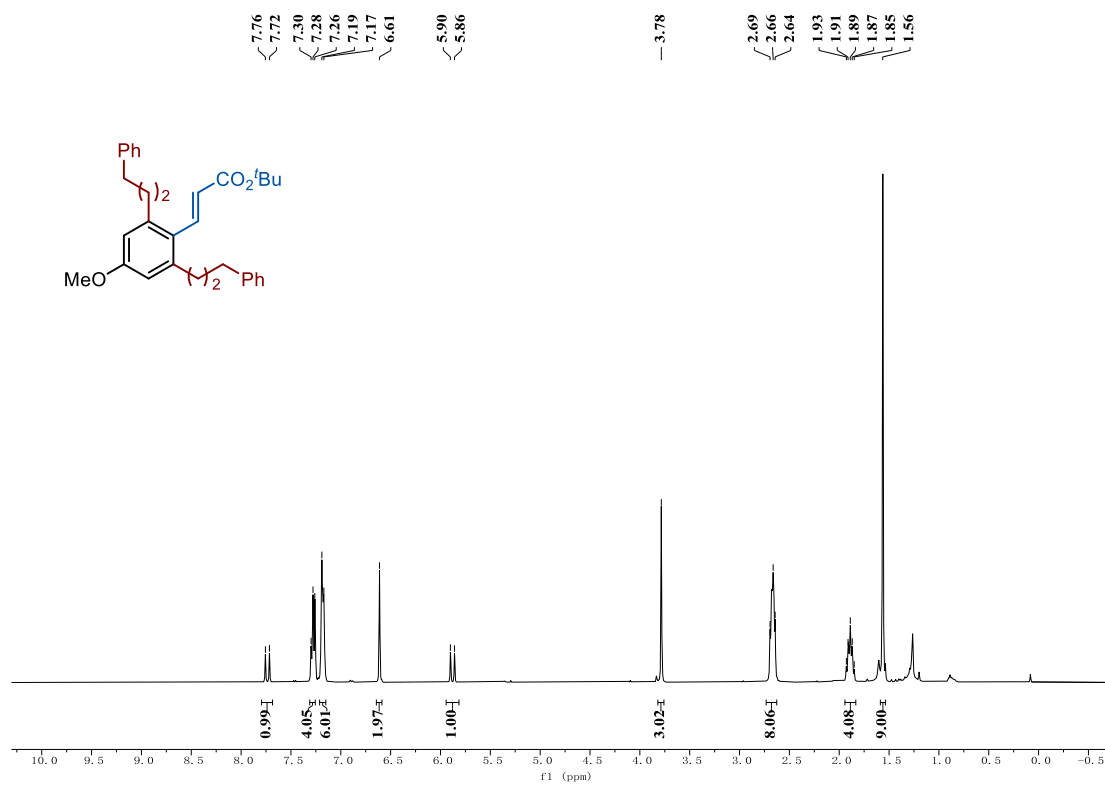

$^{13}\text{C}$  NMR of **4bj** (100 MHz,  $\text{CDCl}_3$ )

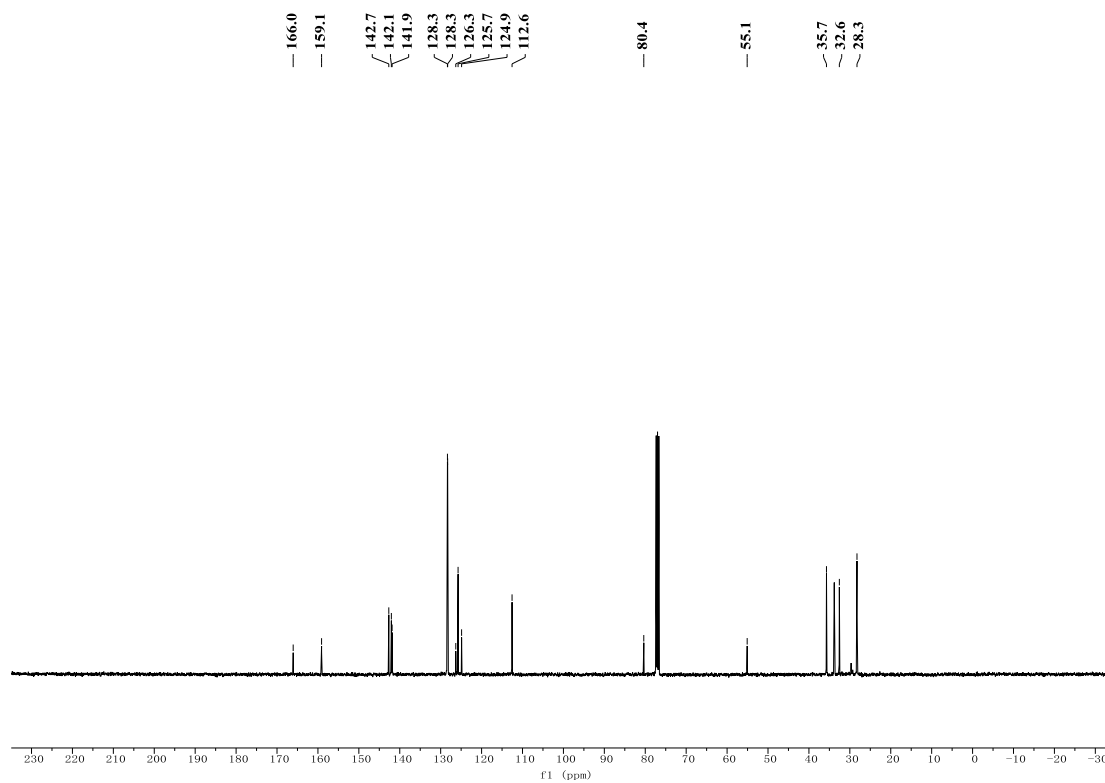

$^1\text{H}$  NMR of **4bk** (400 MHz,  $\text{CDCl}_3$ )

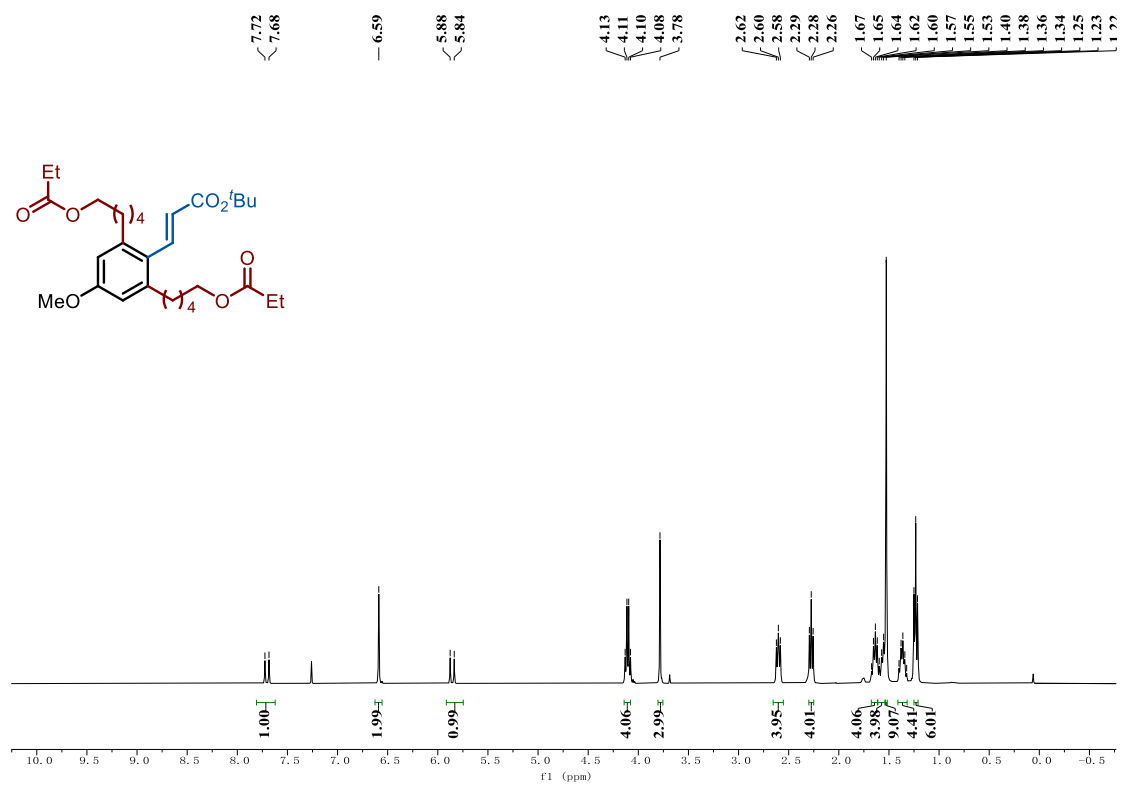

$^{13}\text{C}$  NMR of **4bk** (100 MHz,  $\text{CDCl}_3$ )

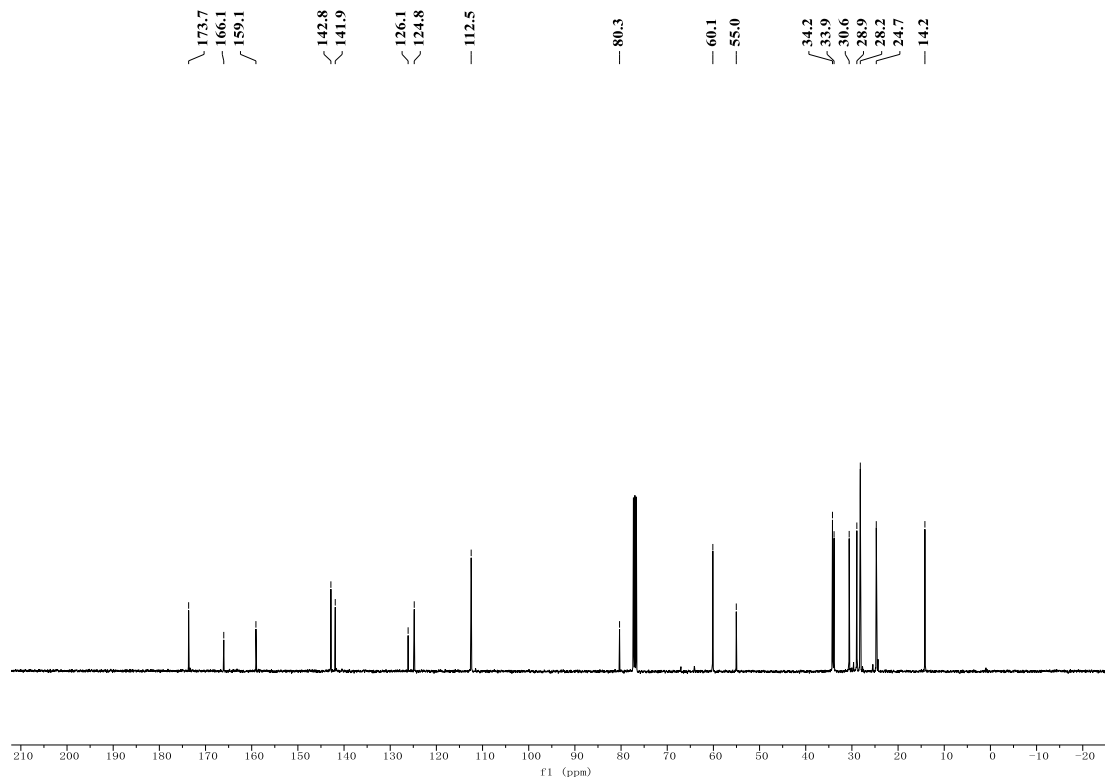

$^1\text{H}$  NMR of **4bl** (400 MHz,  $\text{CDCl}_3$ )

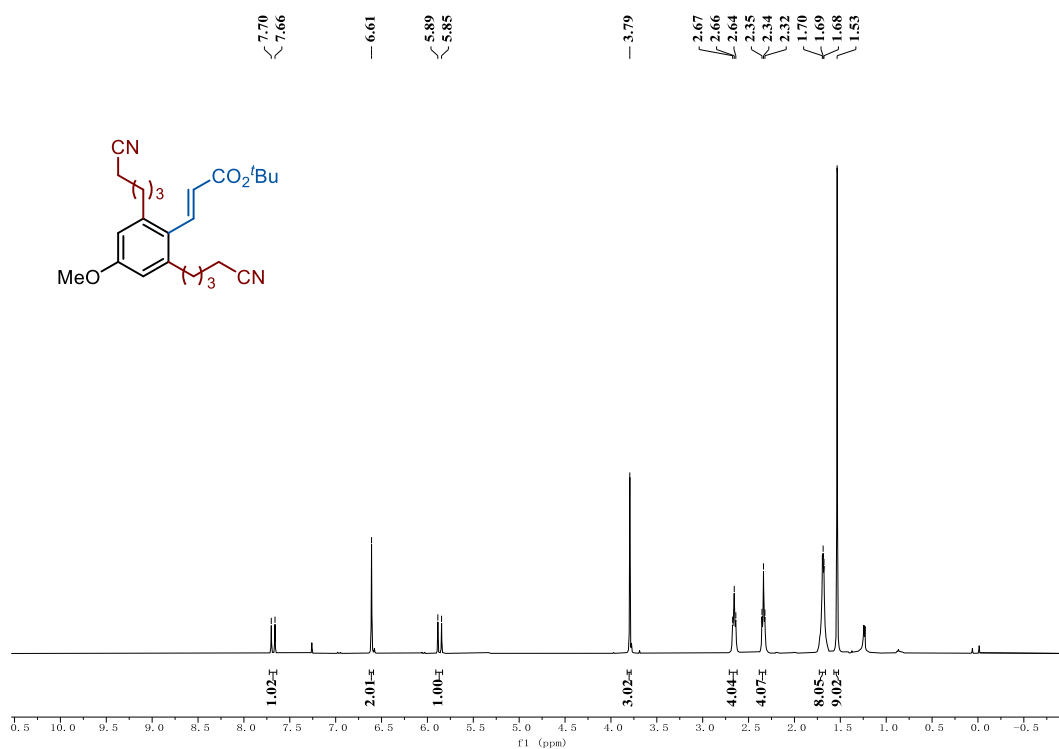

$^{13}\text{C}$  NMR of **4bl** (100 MHz,  $\text{CDCl}_3$ )

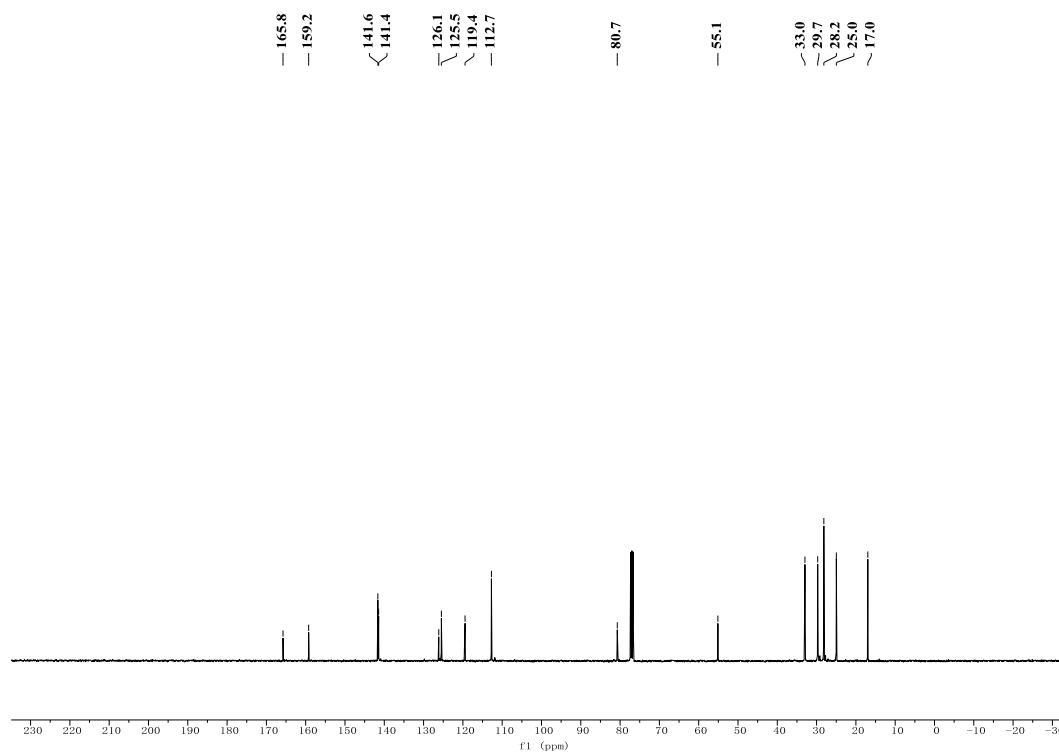

$^1\text{H}$  NMR of **4ca** (400 MHz,  $\text{CDCl}_3$ )

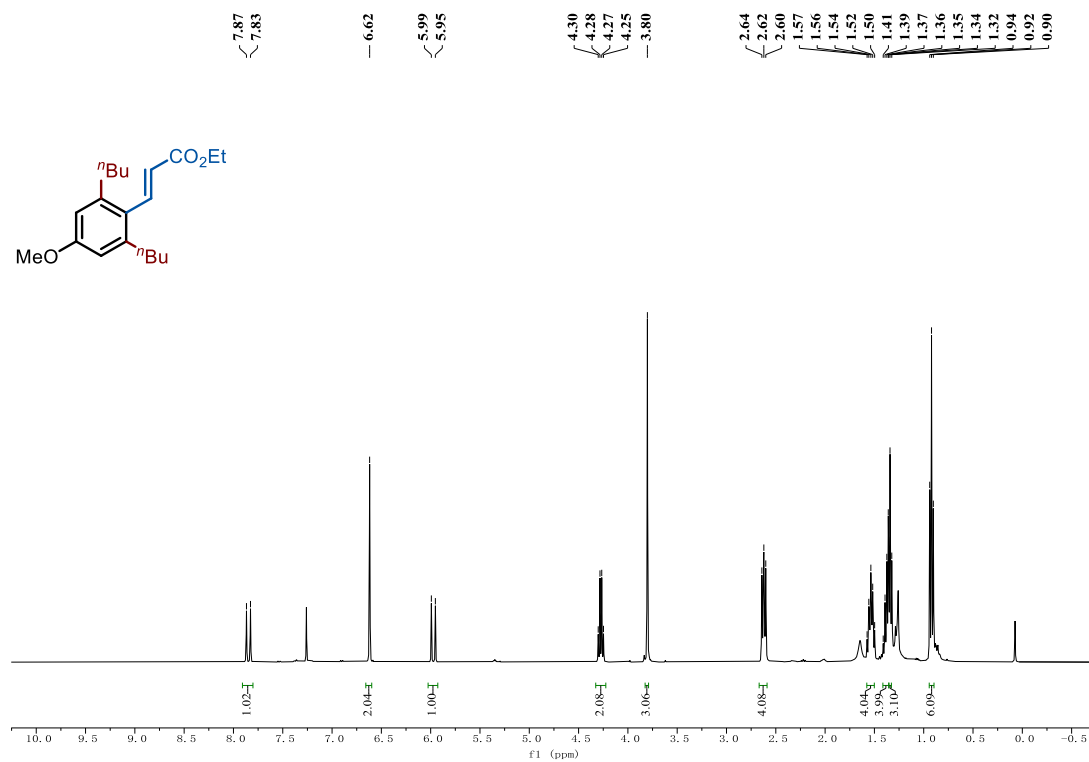

$^{13}\text{C}$  NMR of **4ca** (100 MHz,  $\text{CDCl}_3$ )

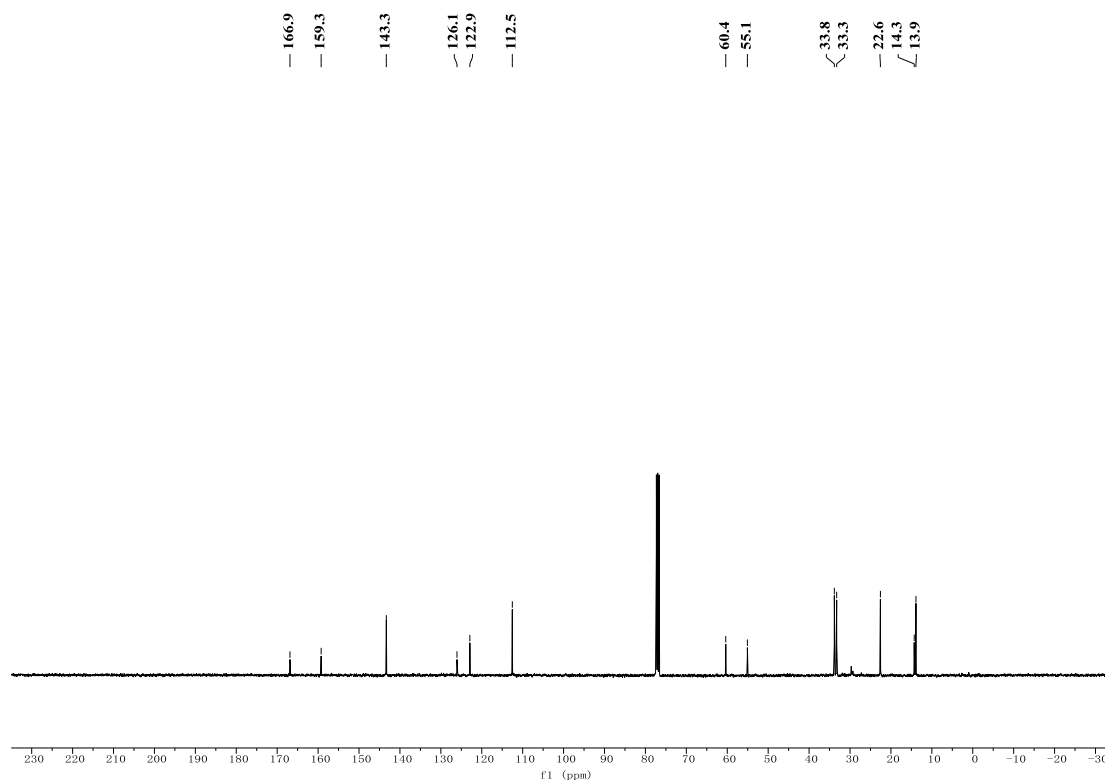



$^1\text{H}$  NMR of **4cb** (400 MHz,  $\text{CDCl}_3$ )

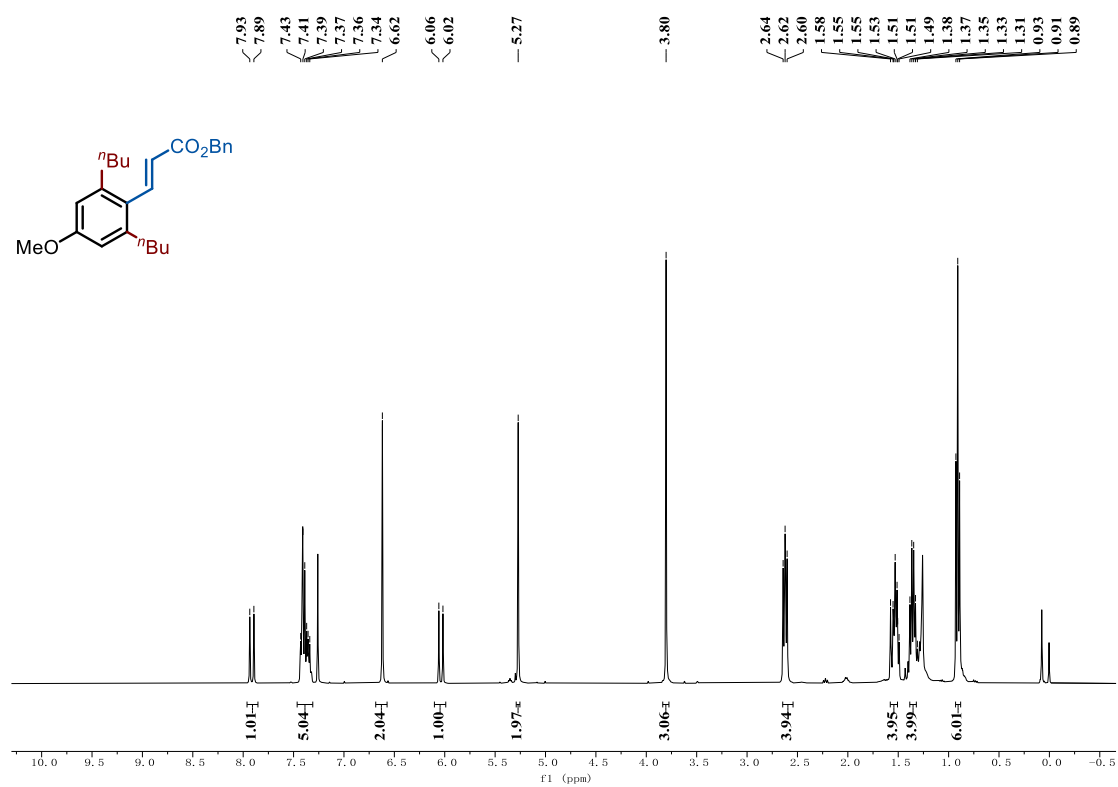

$^{13}\text{C}$  NMR of **4cb** (100 MHz,  $\text{CDCl}_3$ )

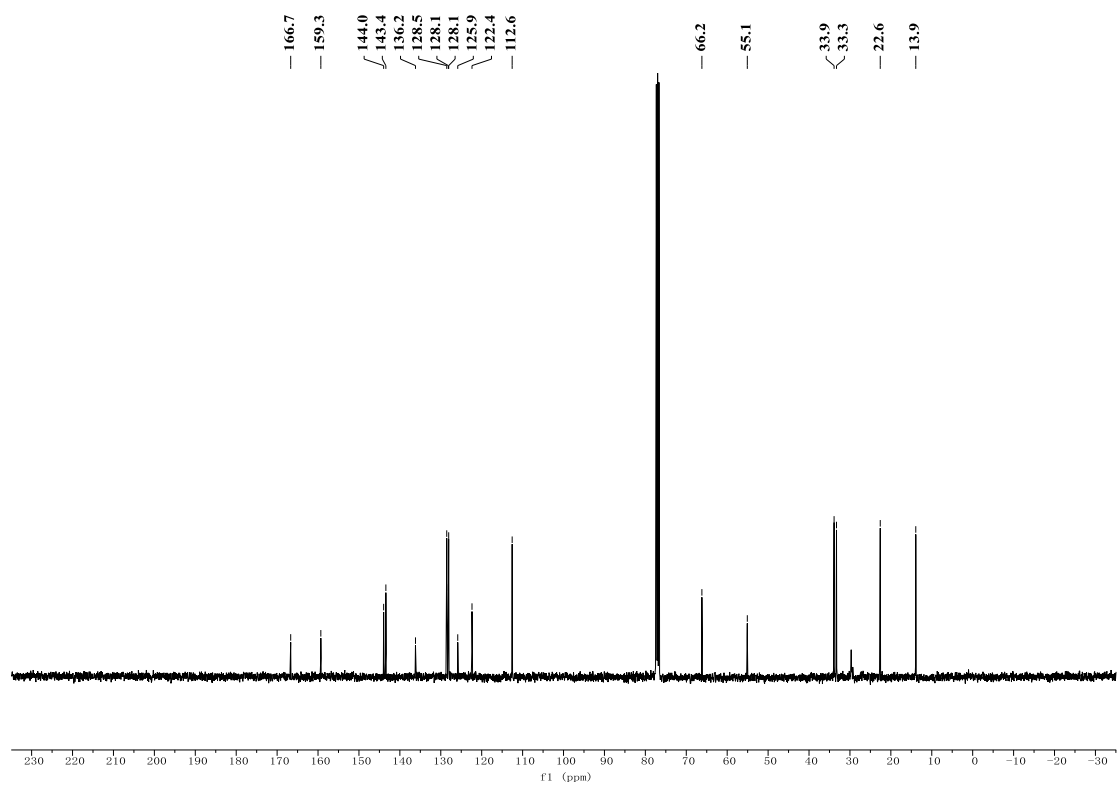

<sup>1</sup>H NMR of **4cc** (400 MHz, CDCl<sub>3</sub>)

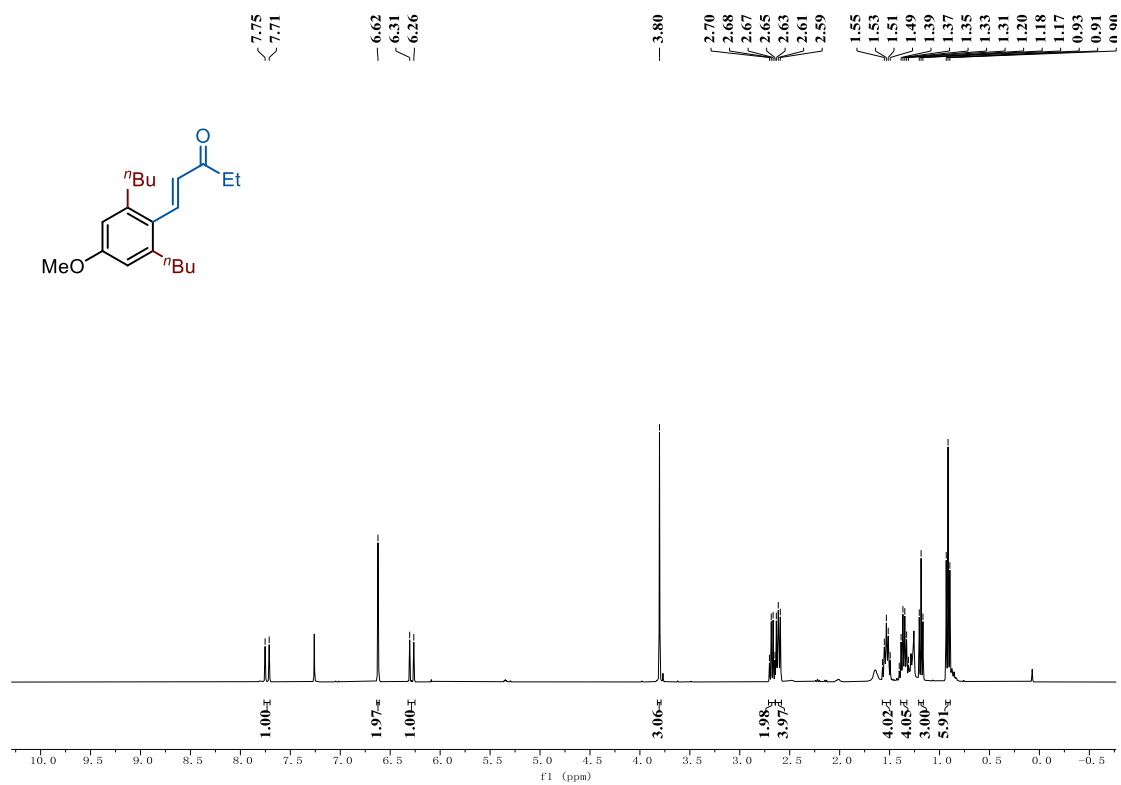

<sup>13</sup>C NMR of **4cc** (100 MHz, CDCl<sub>3</sub>)

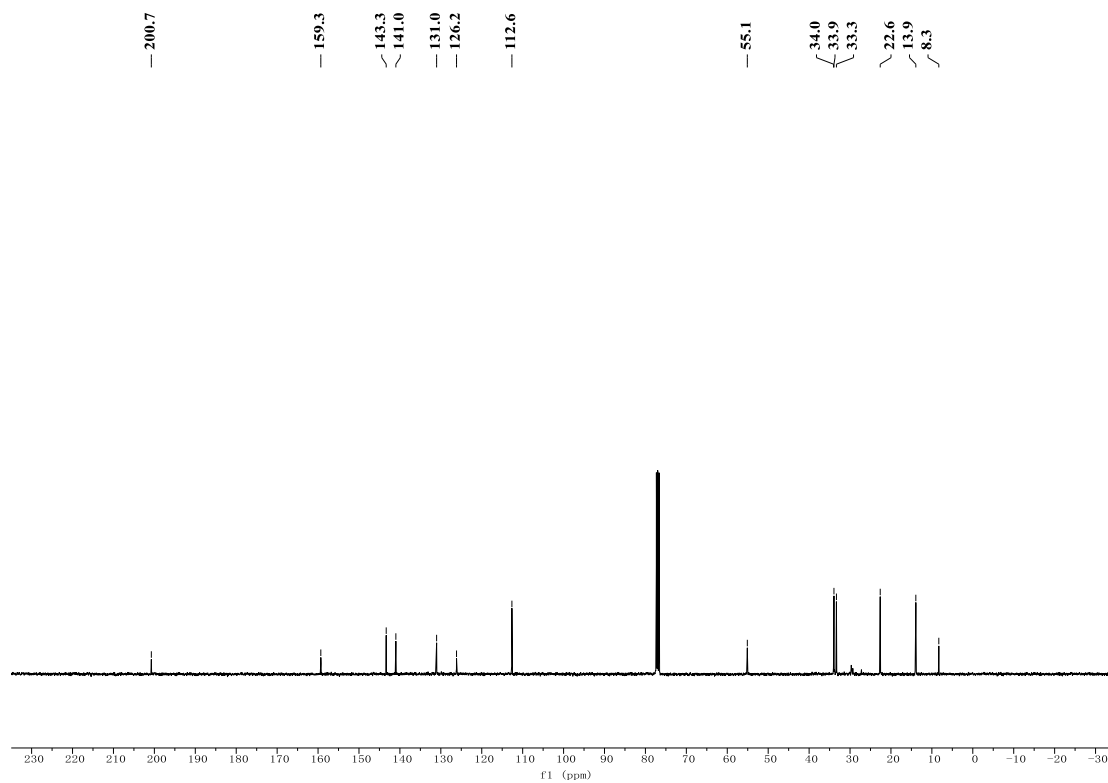

$^1\text{H}$  NMR of **4cd** (400 MHz,  $\text{CDCl}_3$ )

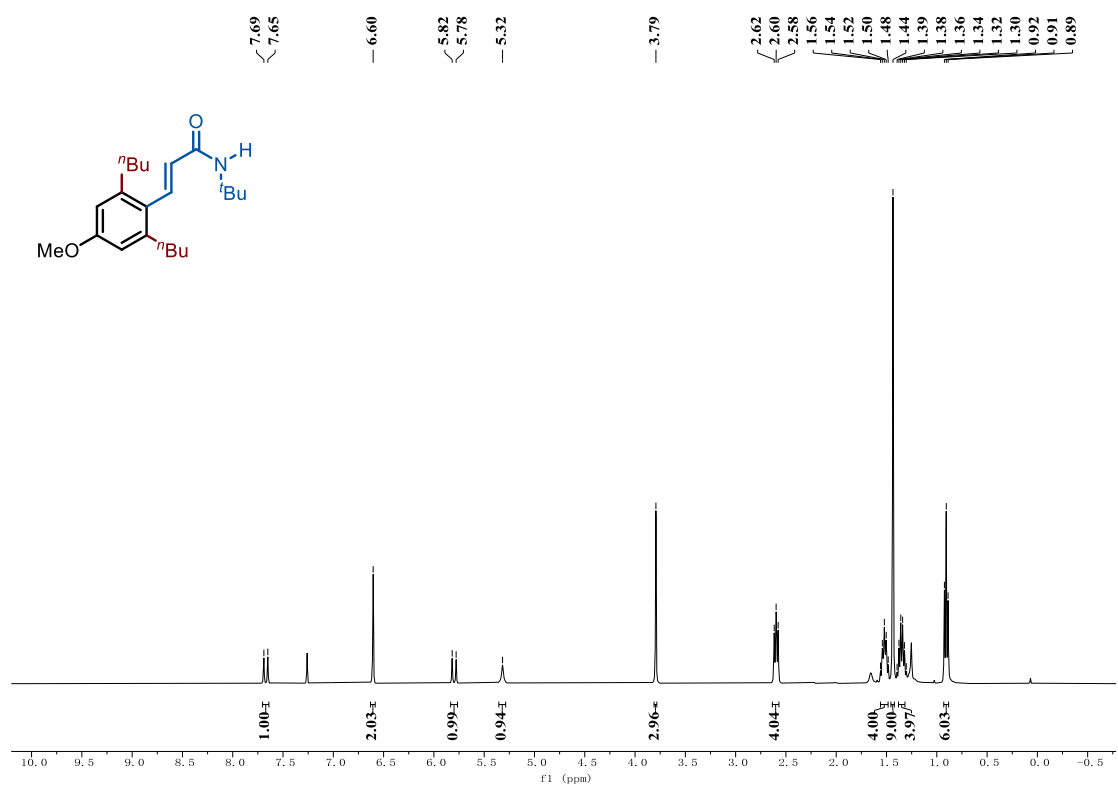

$^{13}\text{C}$  NMR of **4cd** (100 MHz,  $\text{CDCl}_3$ )

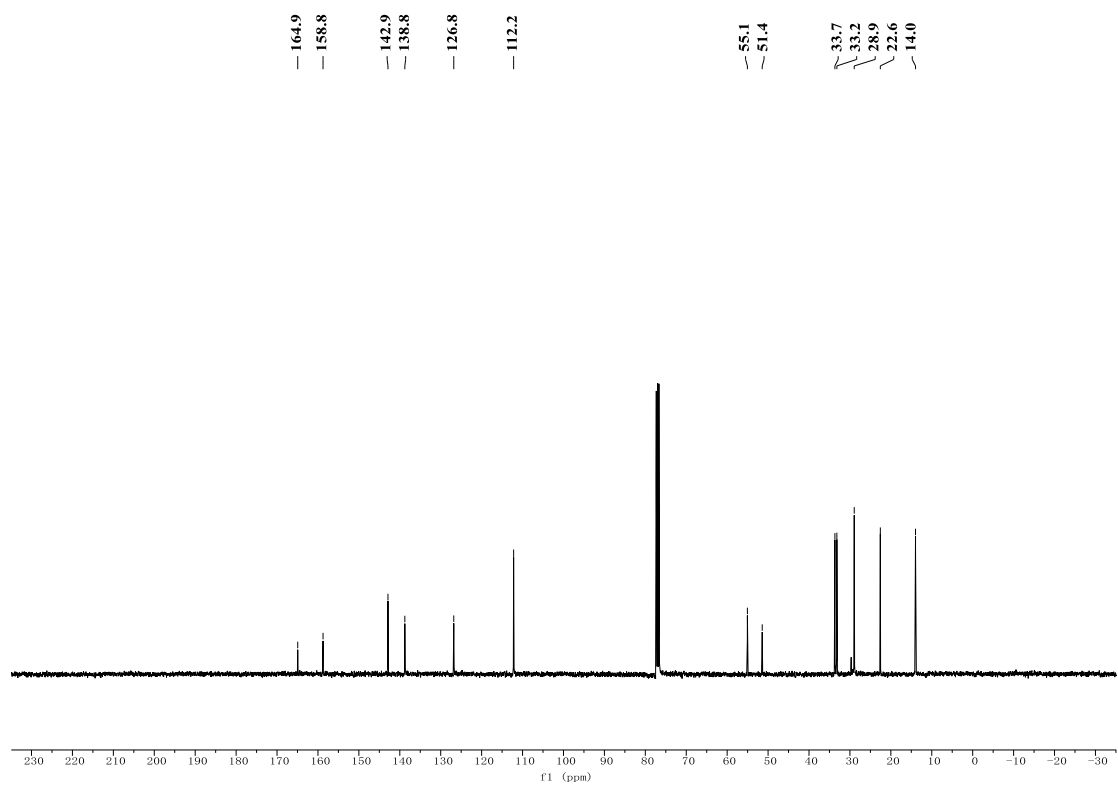

$^1\text{H}$  NMR of **4ce** (400 MHz,  $\text{CDCl}_3$ )

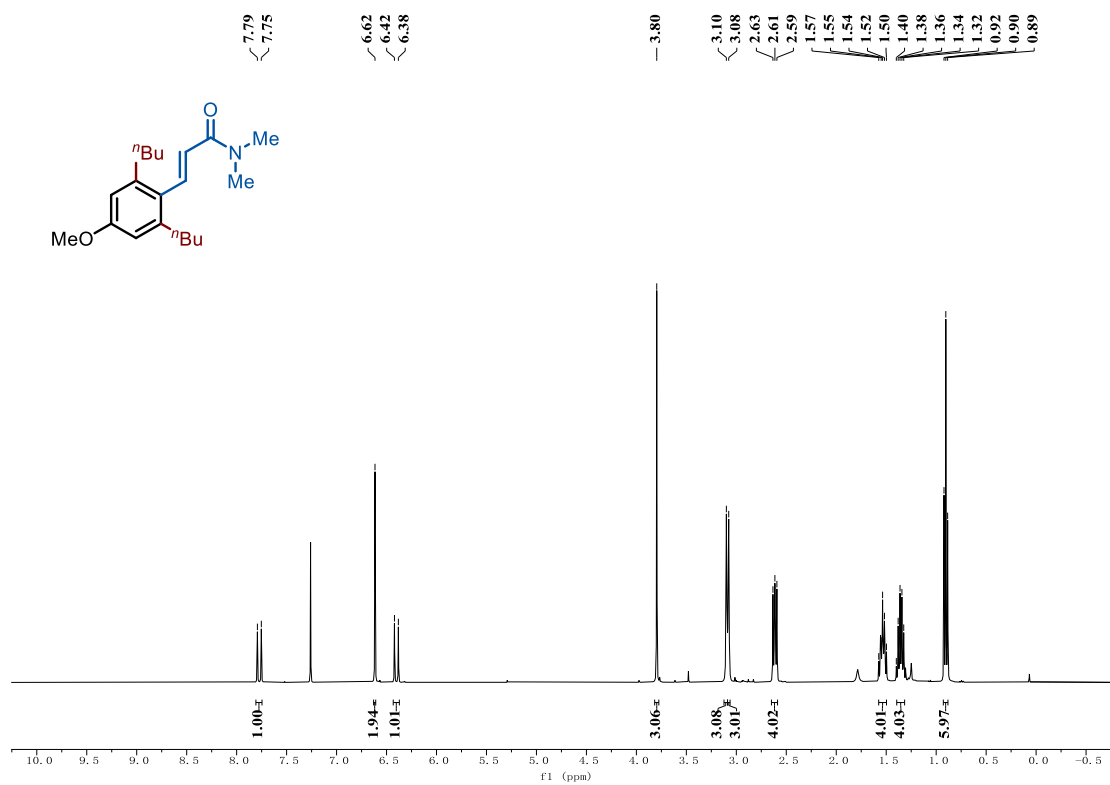

$^{13}\text{C}$  NMR of **4ce** (100 MHz,  $\text{CDCl}_3$ )

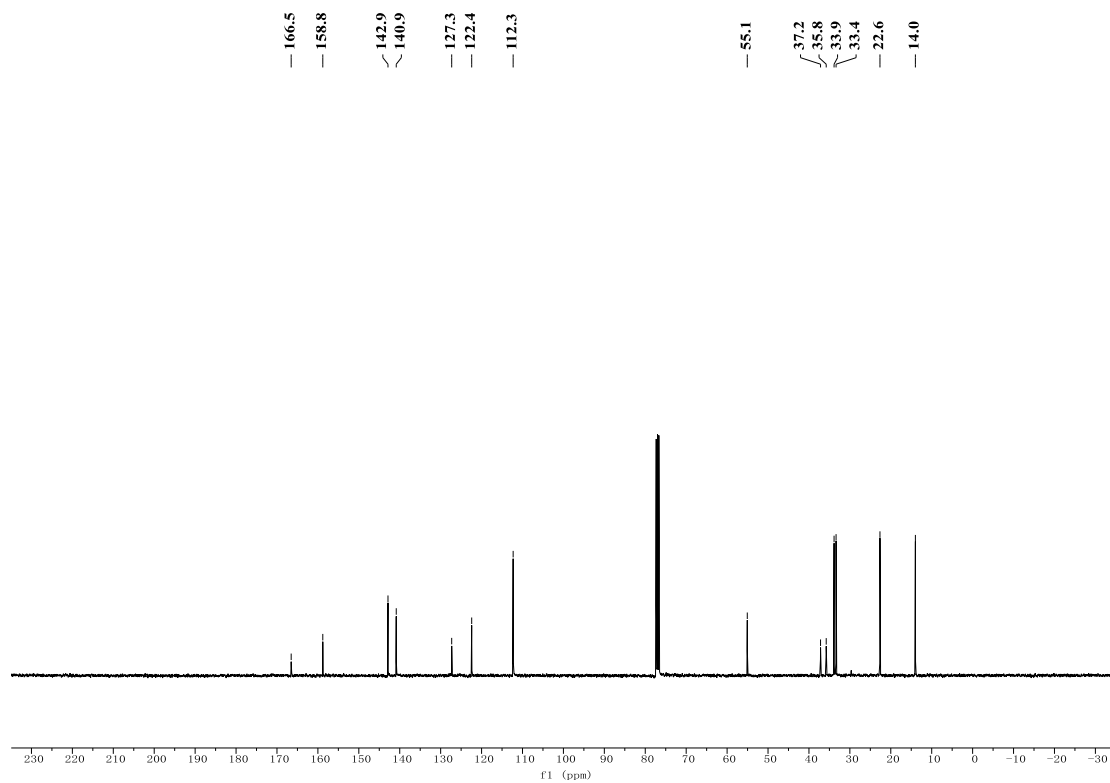

$^1\text{H}$  NMR of **4cf** (400 MHz,  $\text{CDCl}_3$ )

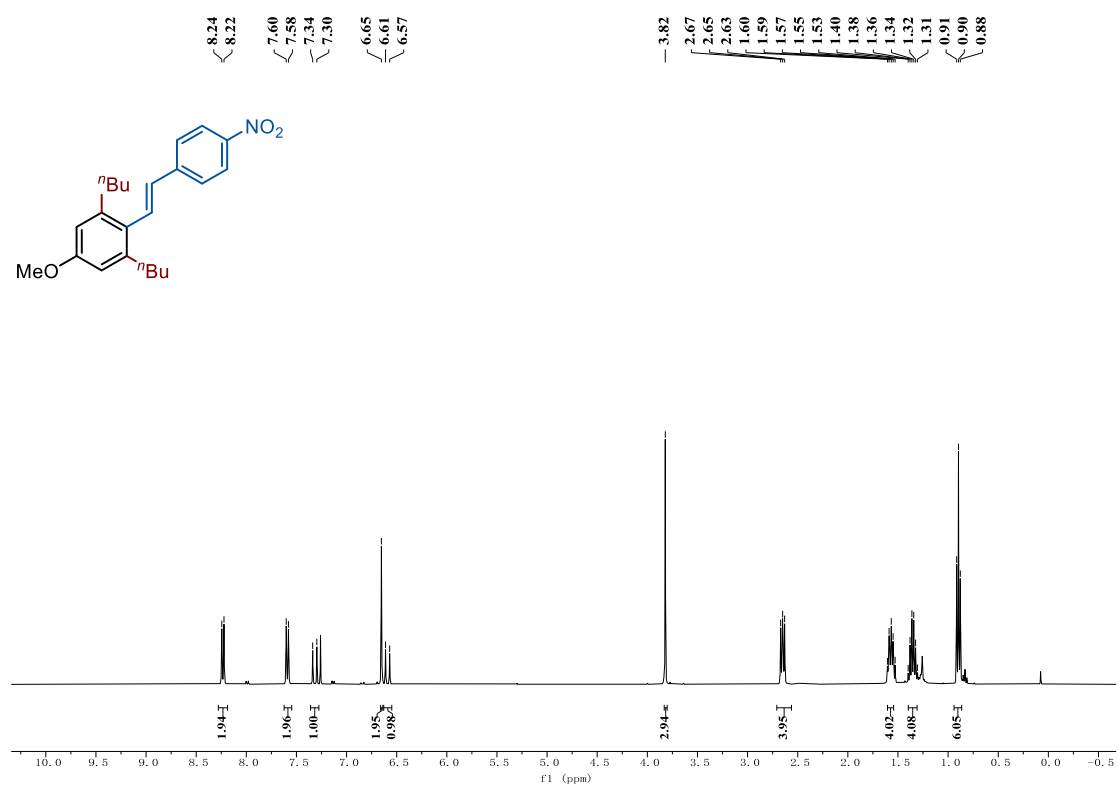

$^{13}\text{C}$  NMR of **4cf** (100 MHz,  $\text{CDCl}_3$ )

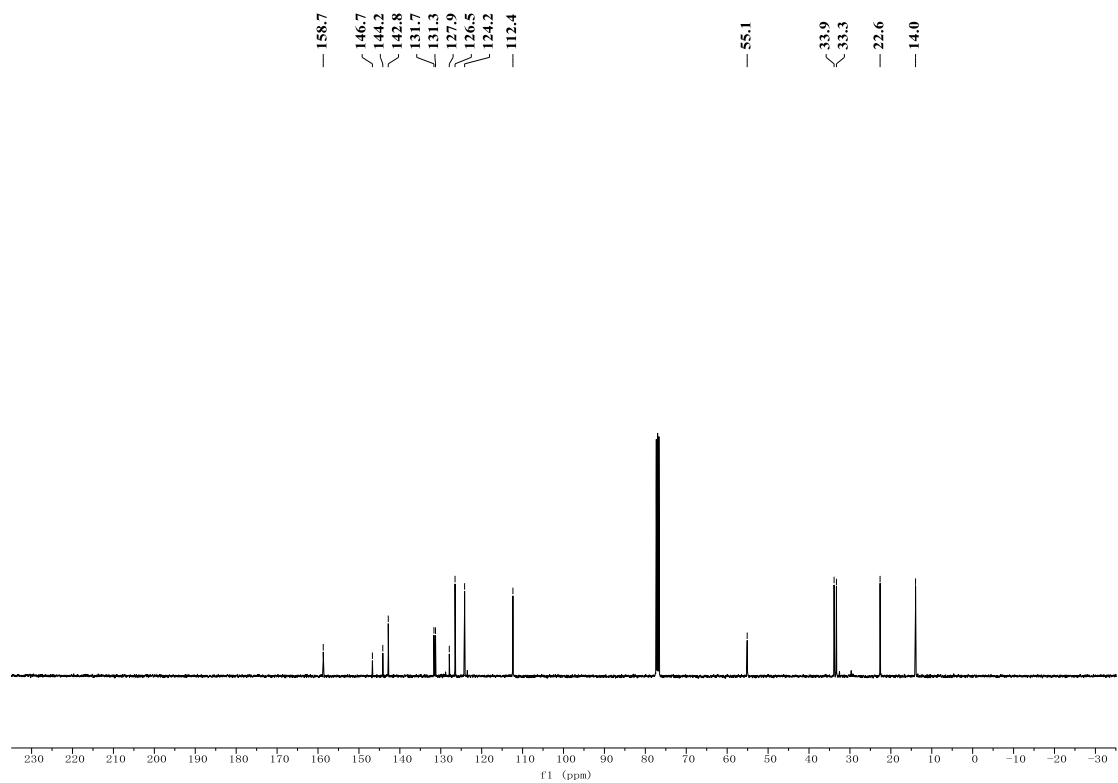

$^1\text{H}$  NMR of **4cg** (400 MHz,  $\text{CDCl}_3$ )

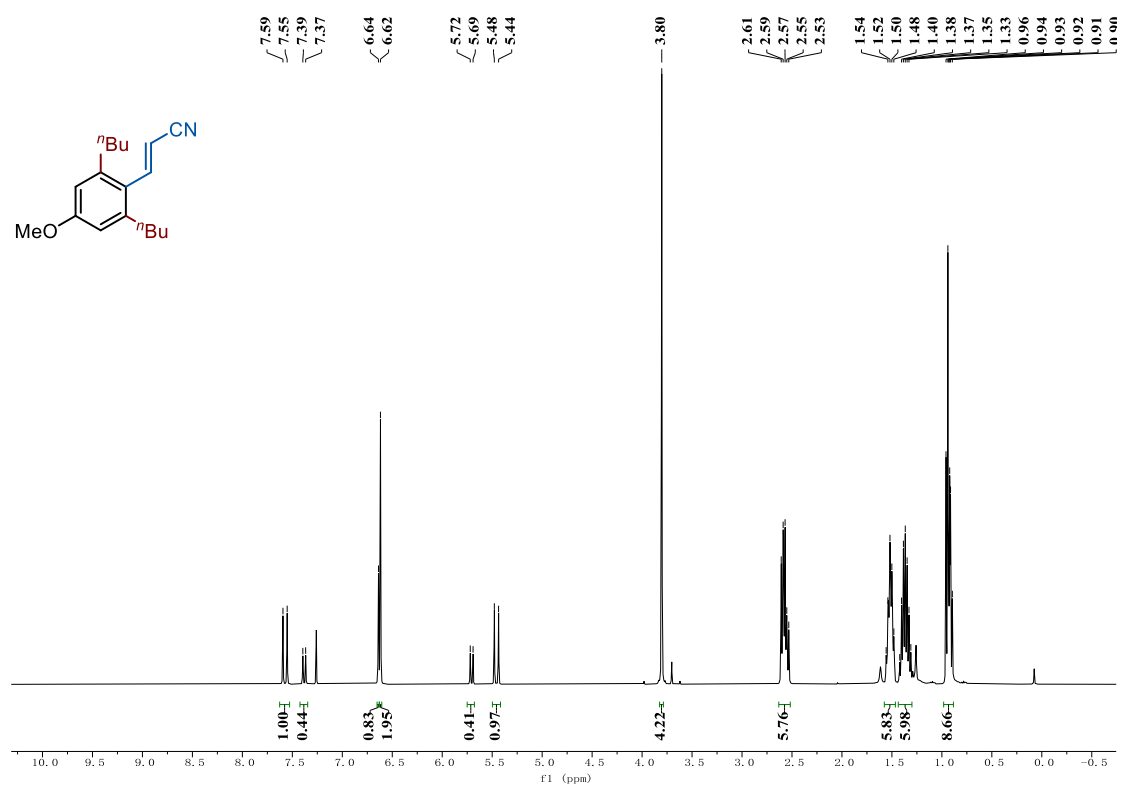

$^{13}\text{C}$  NMR of **4cg** (100 MHz,  $\text{CDCl}_3$ )

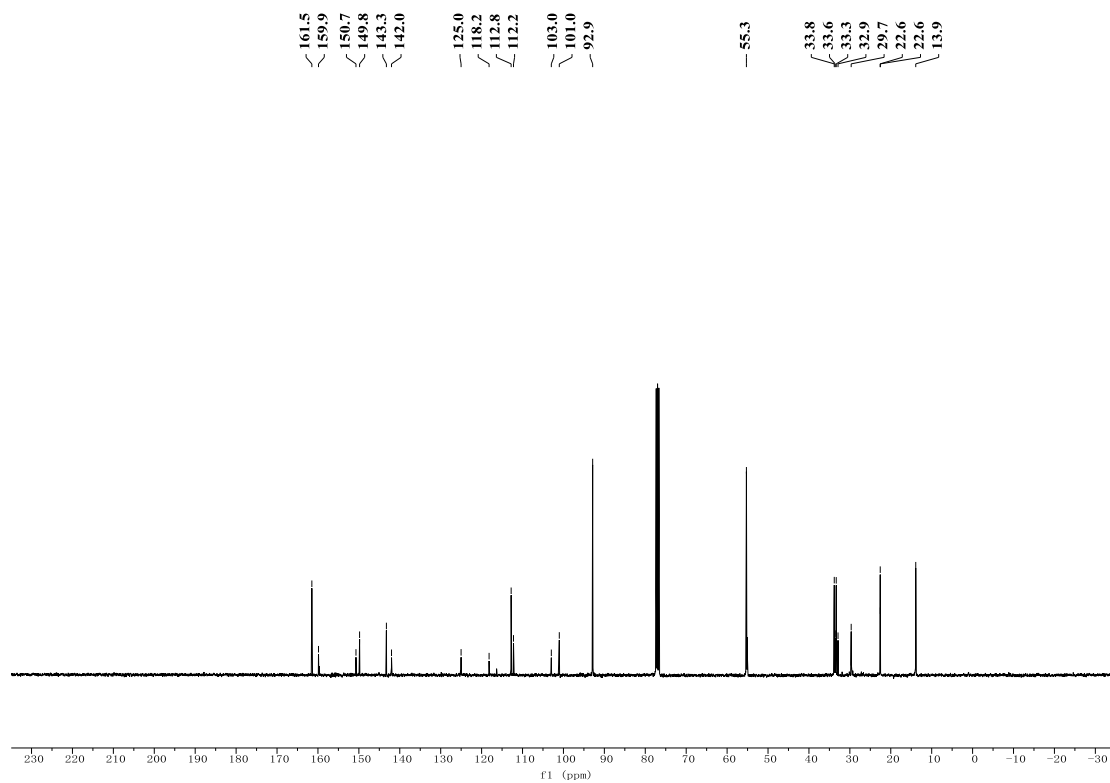

$^1\text{H}$  NMR of **4ch** (400 MHz,  $\text{CDCl}_3$ )

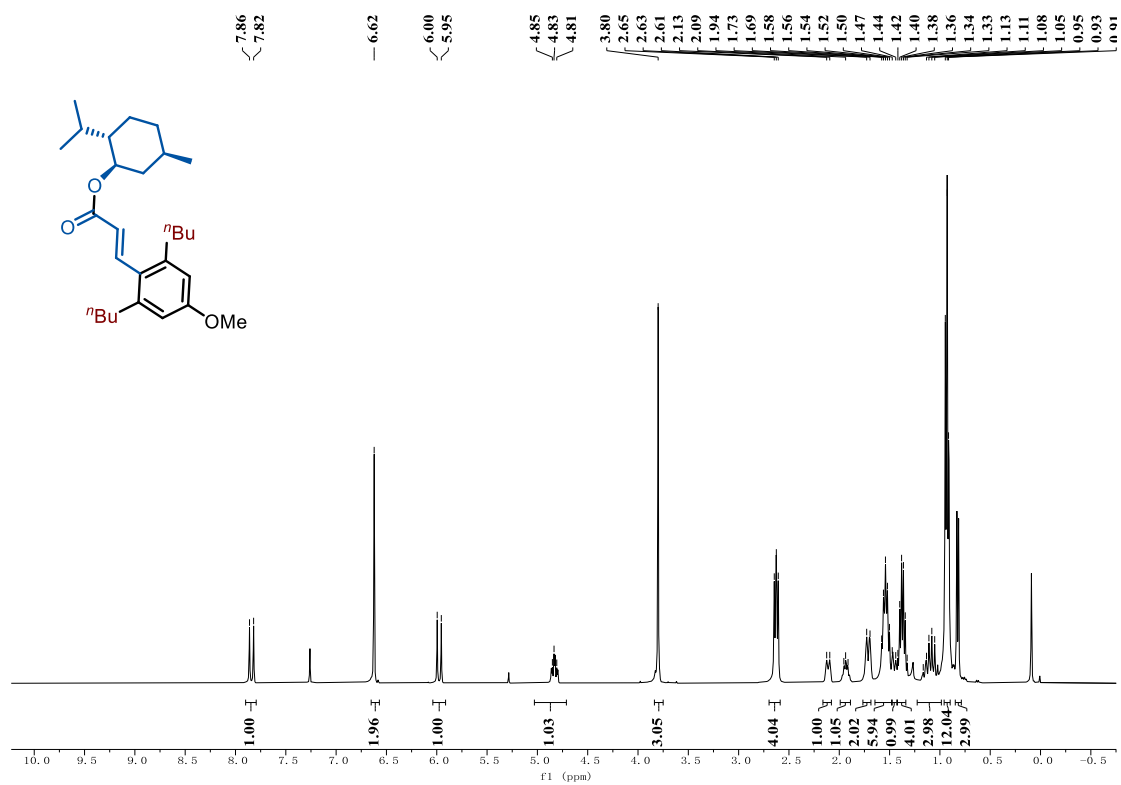

$^{13}\text{C}$  NMR of **4ch** (100 MHz,  $\text{CDCl}_3$ )

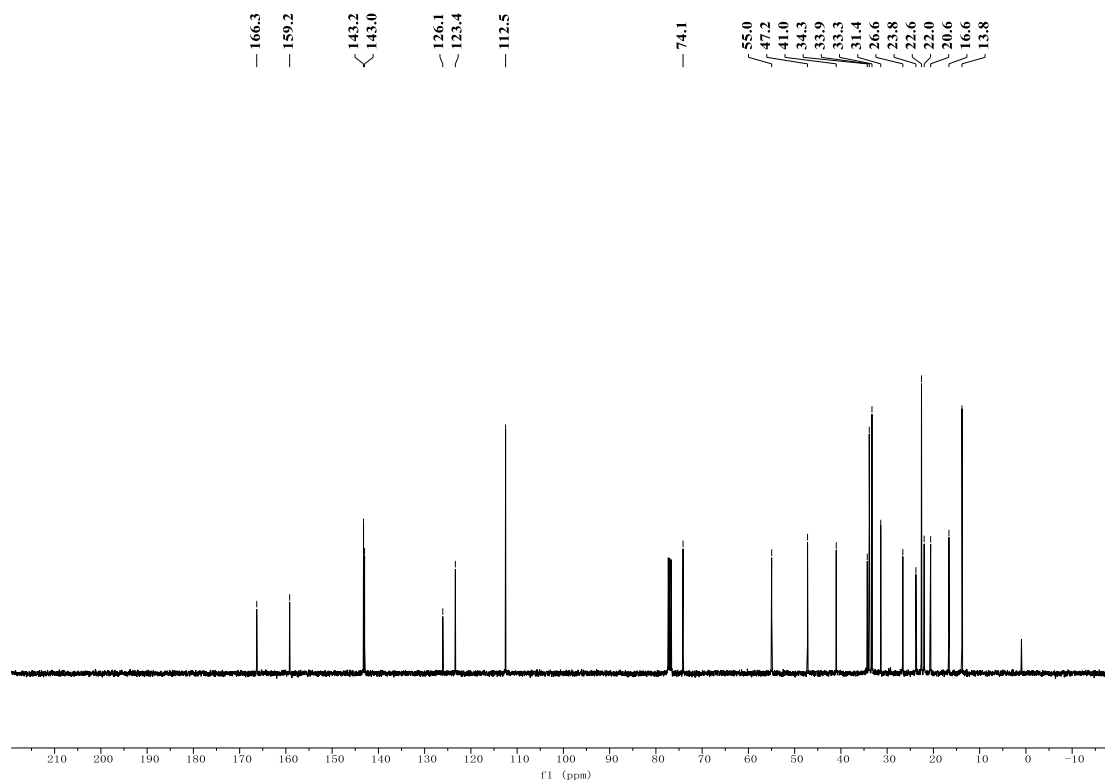

$^1\text{H}$  NMR of **4ci** (400 MHz,  $\text{CDCl}_3$ )

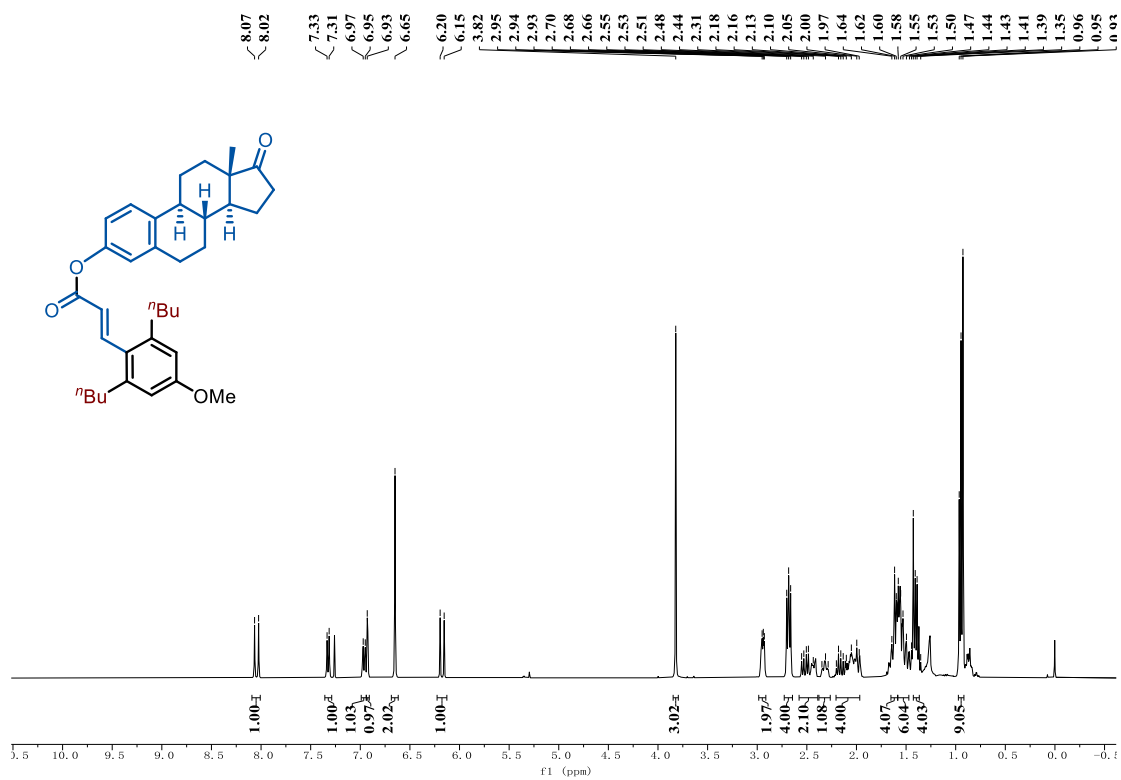

$^{13}\text{C}$  NMR of **4ci** (100 MHz,  $\text{CDCl}_3$ )

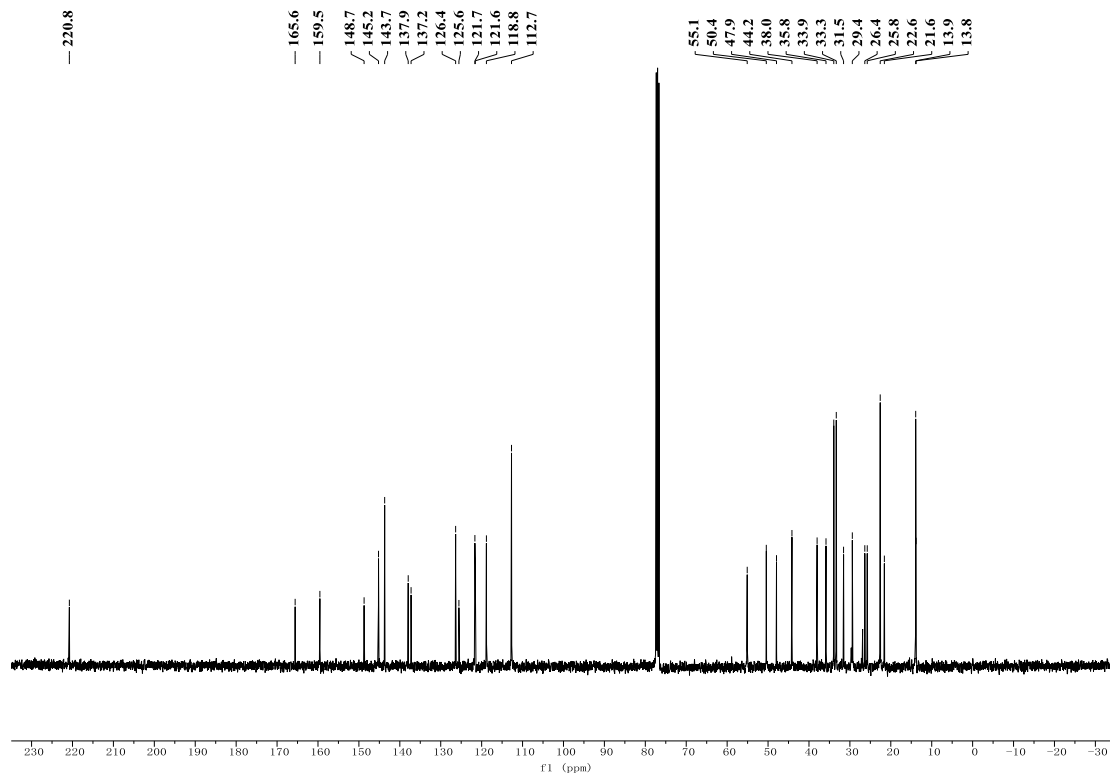



$^1\text{H}$  NMR of **4cj** (400 MHz,  $\text{CDCl}_3$ )

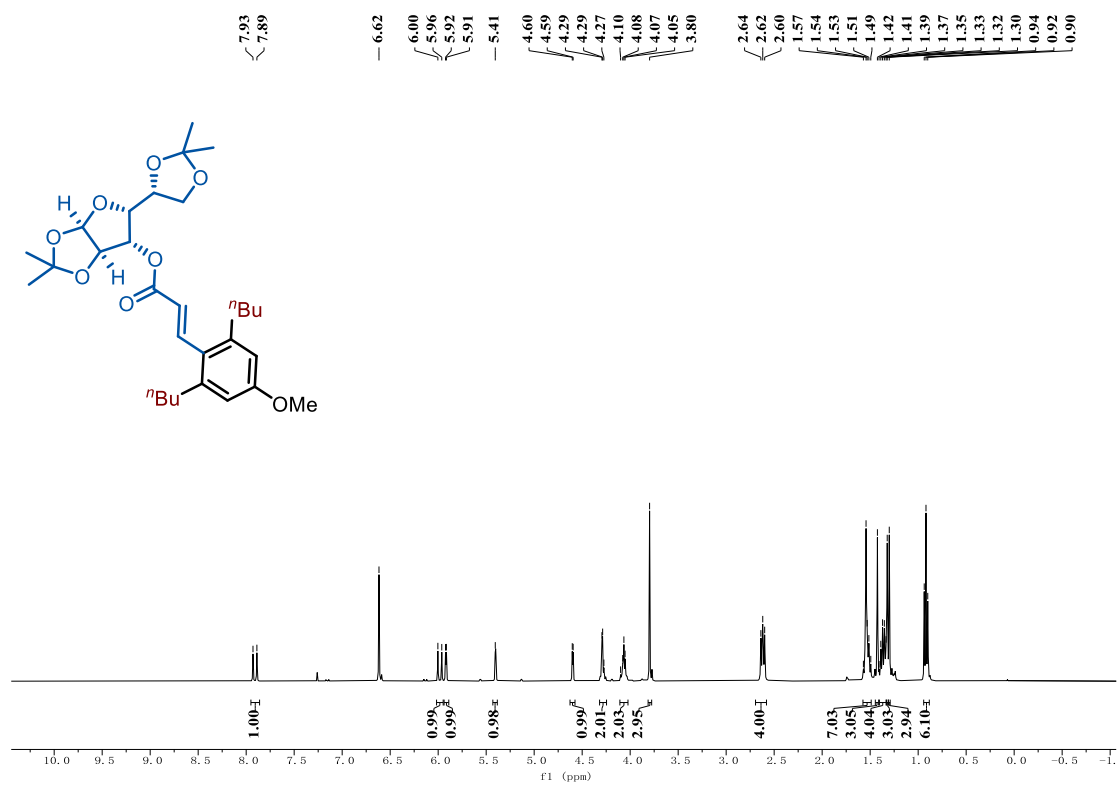

$^{13}\text{C}$  NMR of **4cj** (100 MHz,  $\text{CDCl}_3$ )

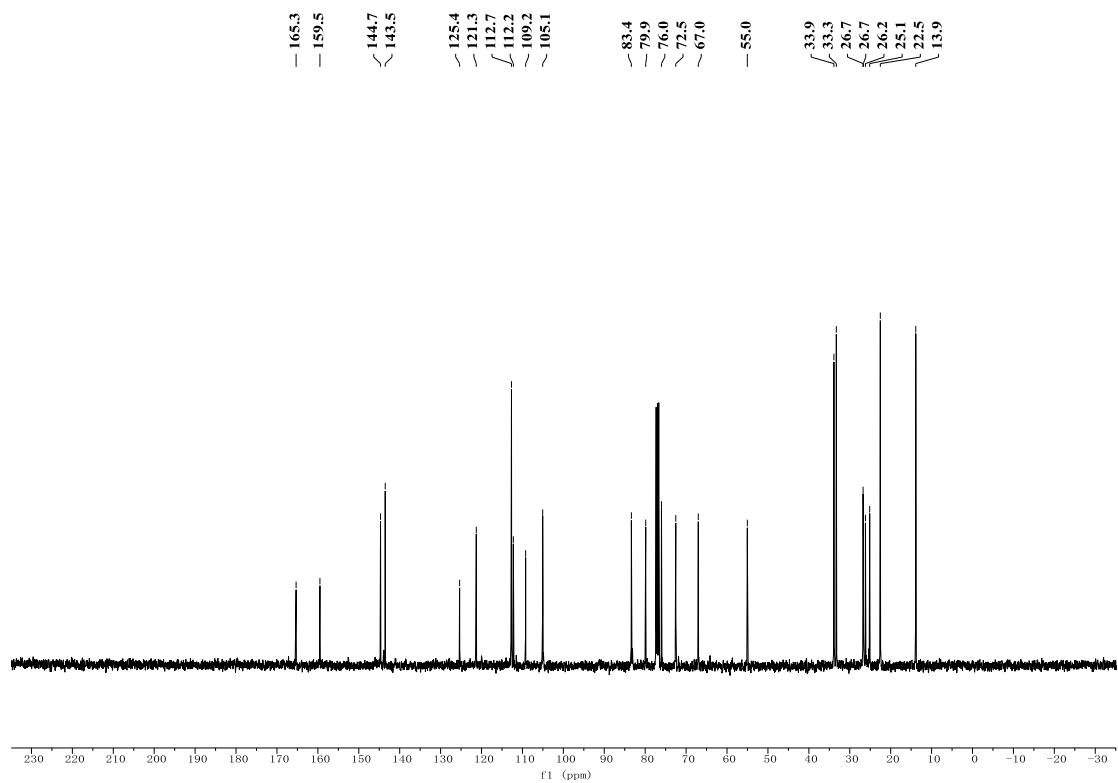

$^1\text{H}$  NMR of **4ck** (400 MHz,  $\text{CDCl}_3$ )

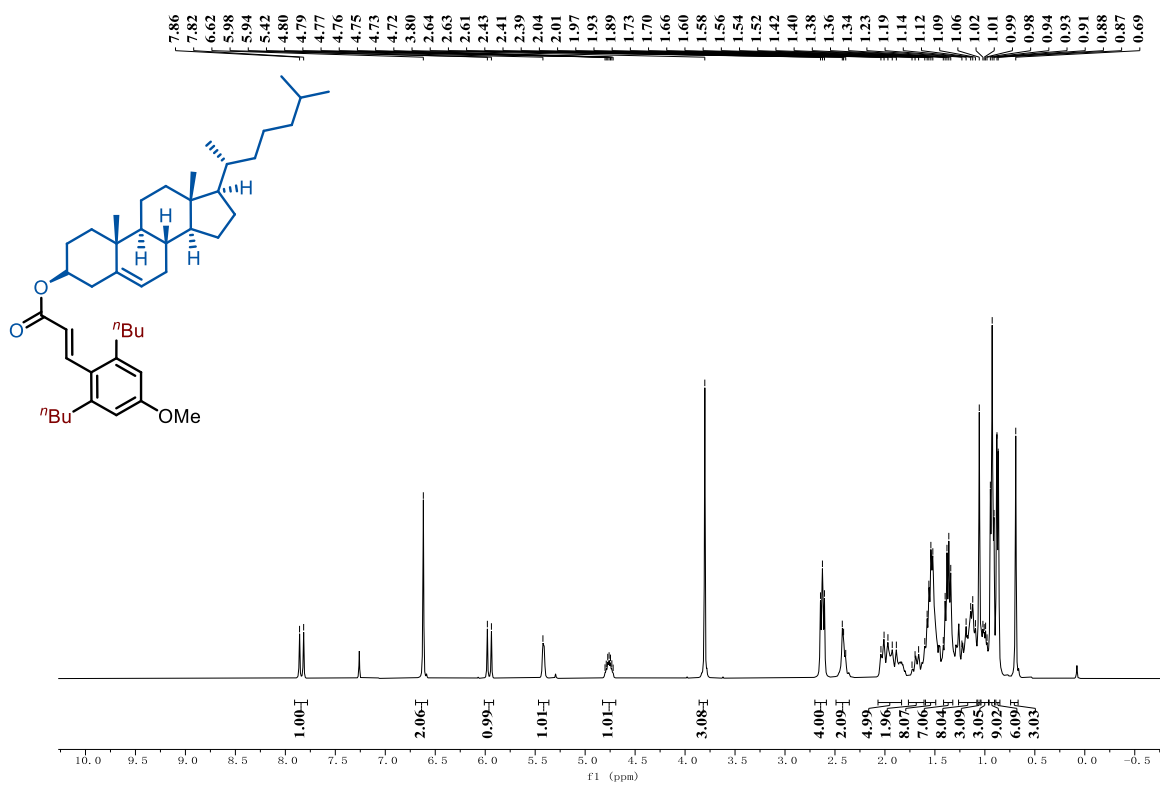

$^{13}\text{C}$  NMR of **4ck** (100 MHz,  $\text{CDCl}_3$ )

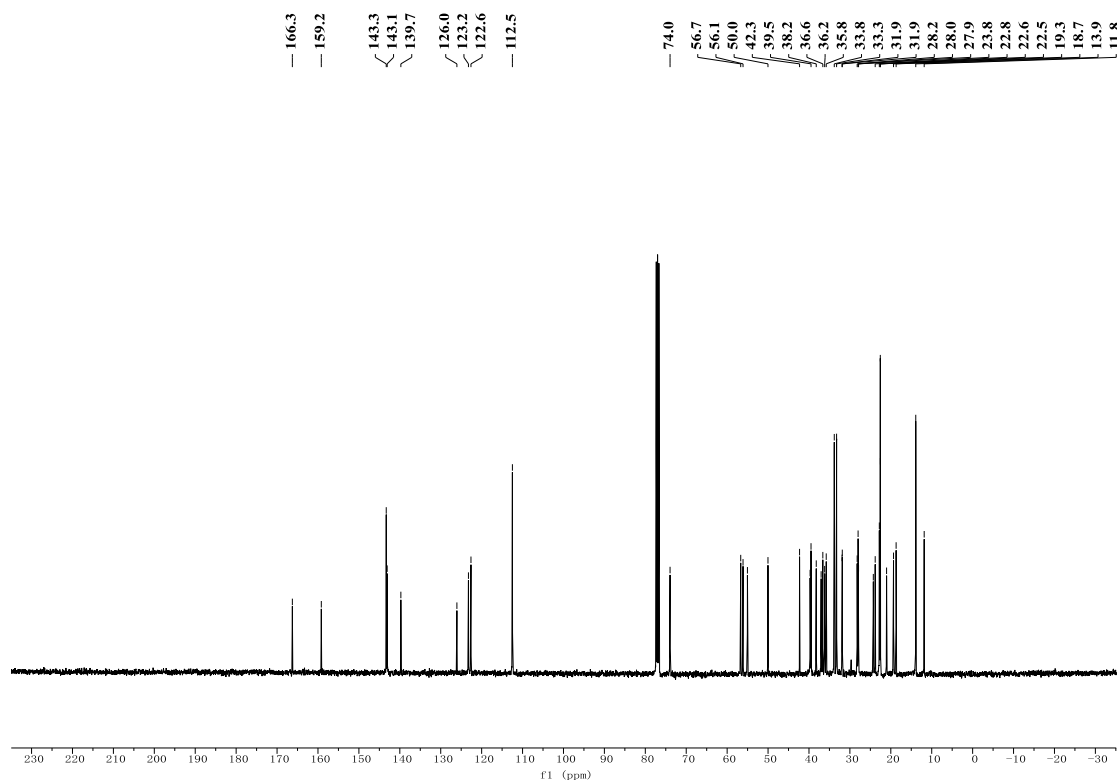

$^1\text{H}$  NMR of **6a** (400 MHz,  $\text{CDCl}_3$ )

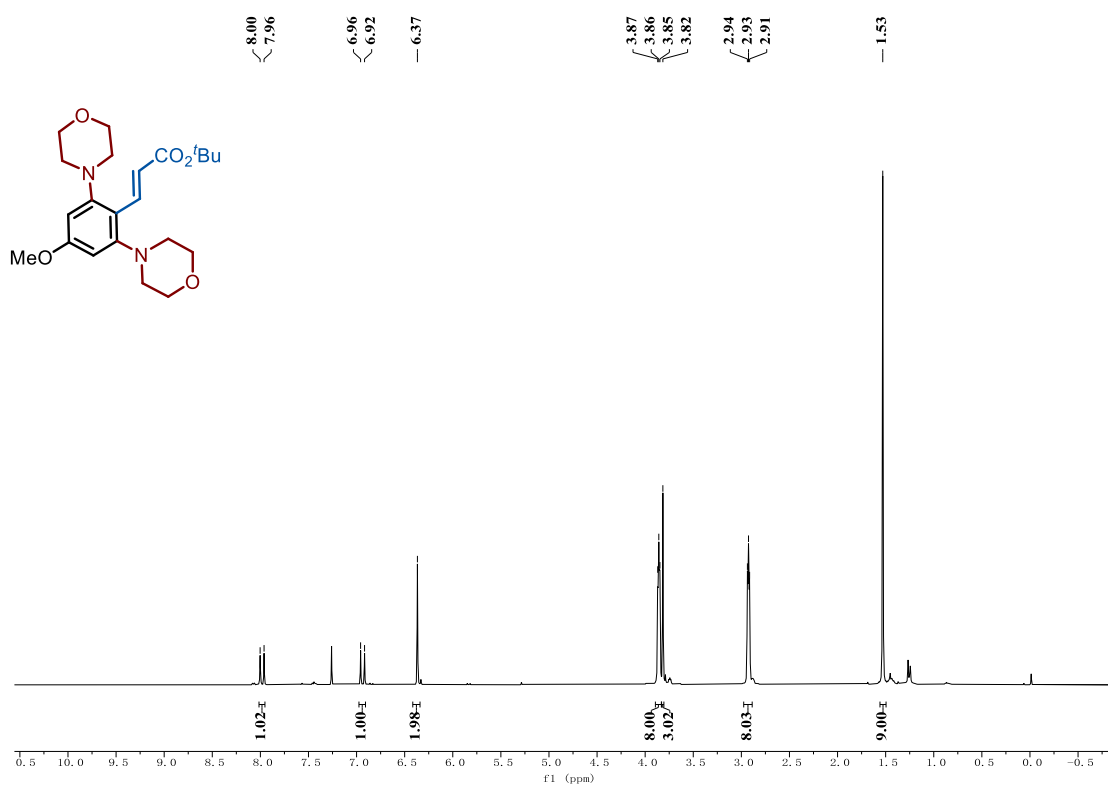

$^{13}\text{C}$  NMR of **6a** (100 MHz,  $\text{CDCl}_3$ )

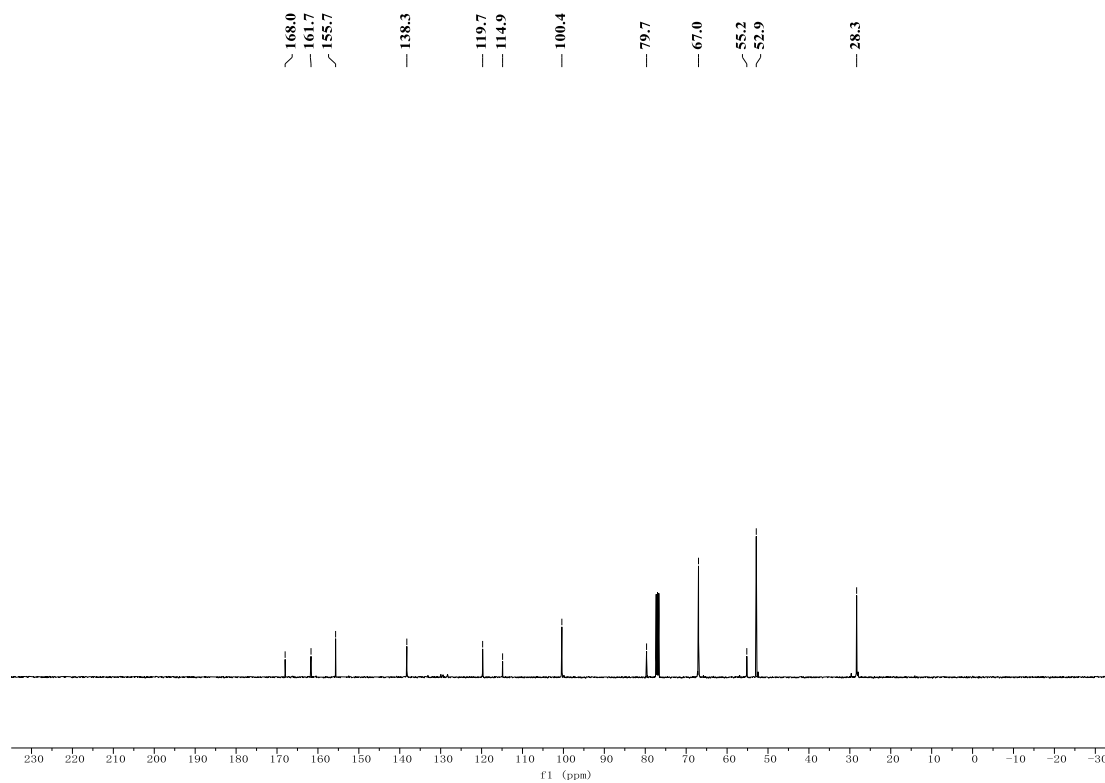

$^1\text{H}$  NMR of **6b** (400 MHz,  $\text{CDCl}_3$ )

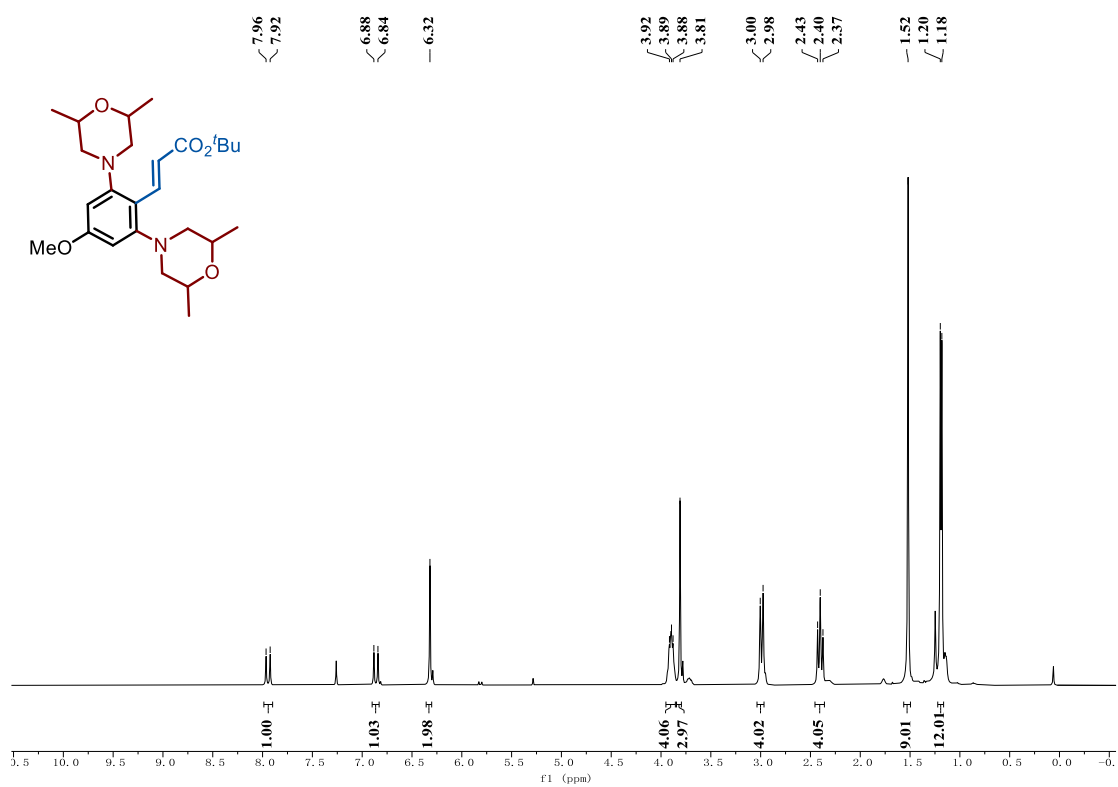

$^{13}\text{C}$  NMR of **6b** (100 MHz,  $\text{CDCl}_3$ )

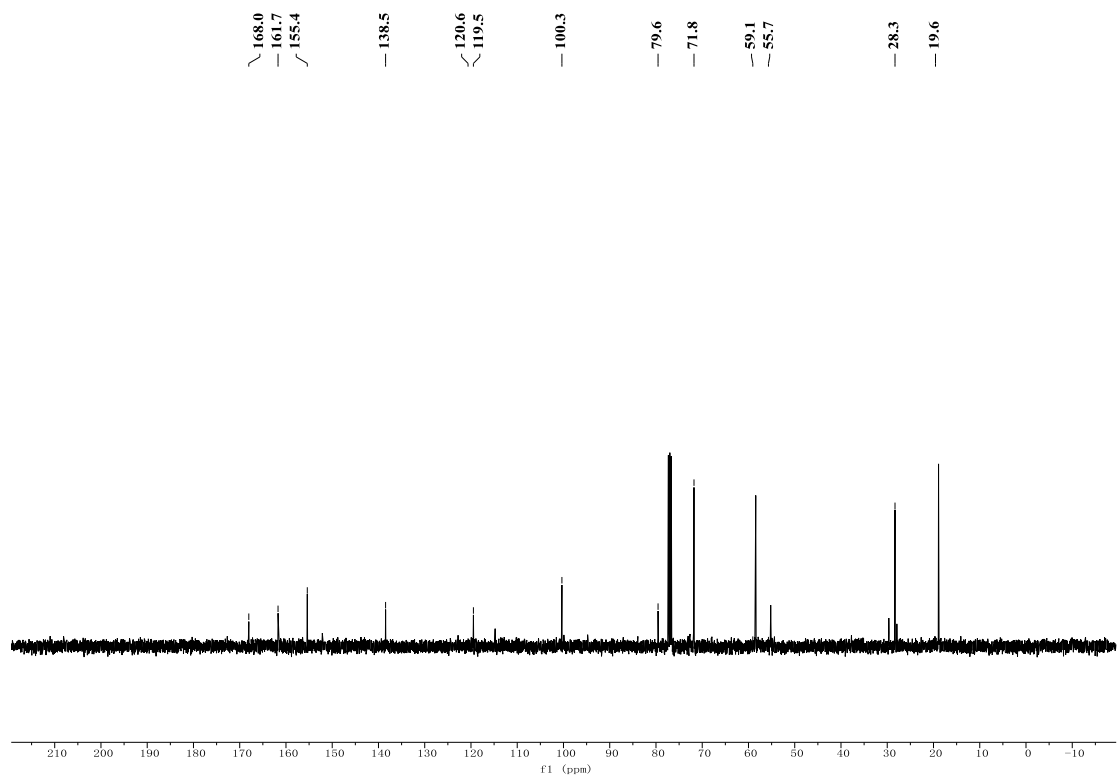

$^1\text{H}$  NMR of **6c** (400 MHz,  $\text{CDCl}_3$ )

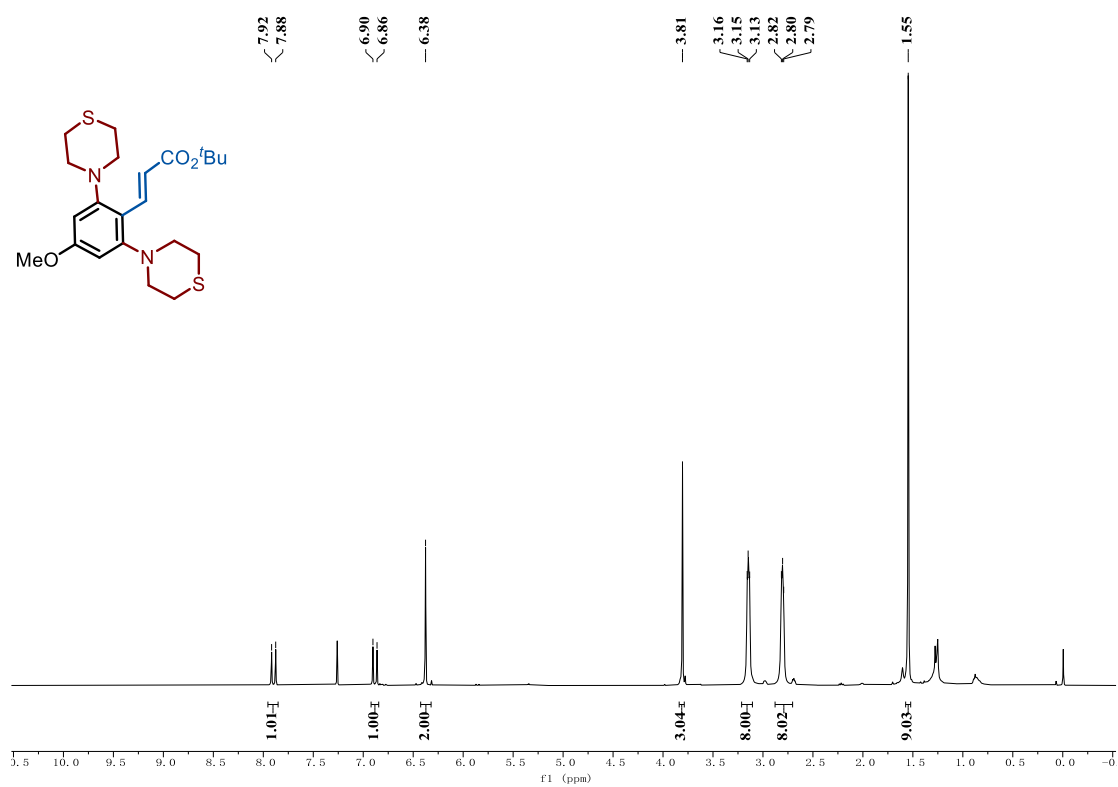

$^{13}\text{C}$  NMR of **6c** (100 MHz,  $\text{CDCl}_3$ )

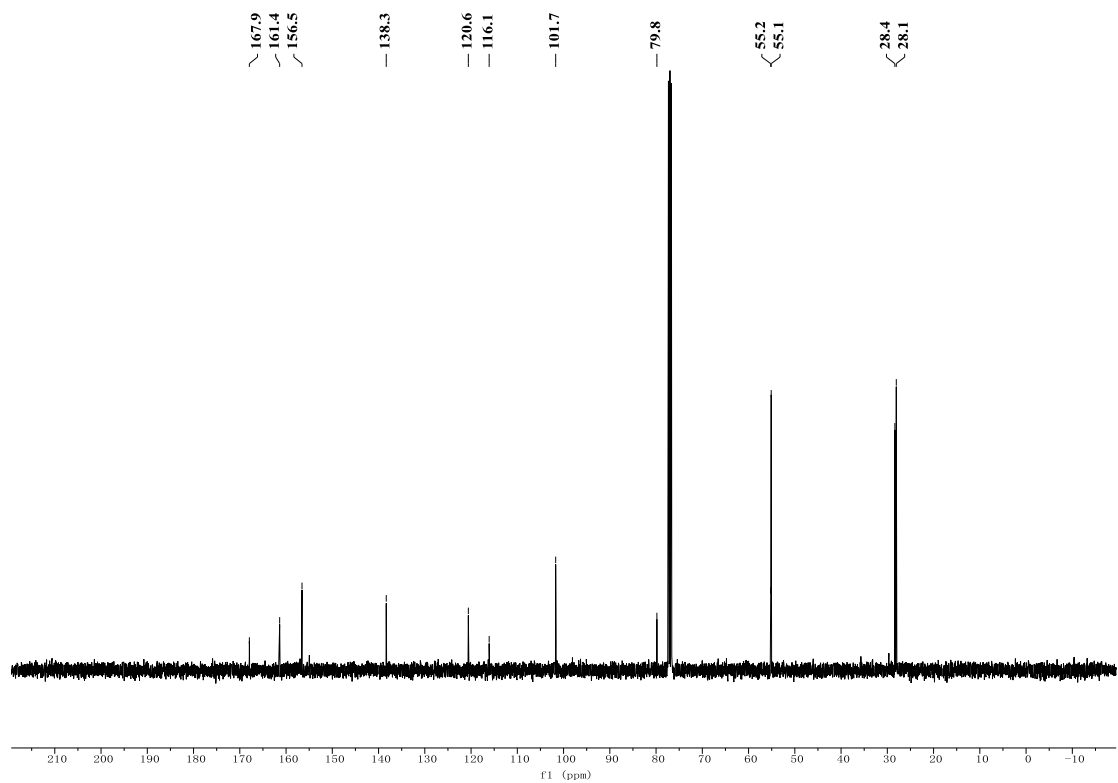

$^1\text{H}$  NMR of **8a** (400 MHz,  $\text{CDCl}_3$ )

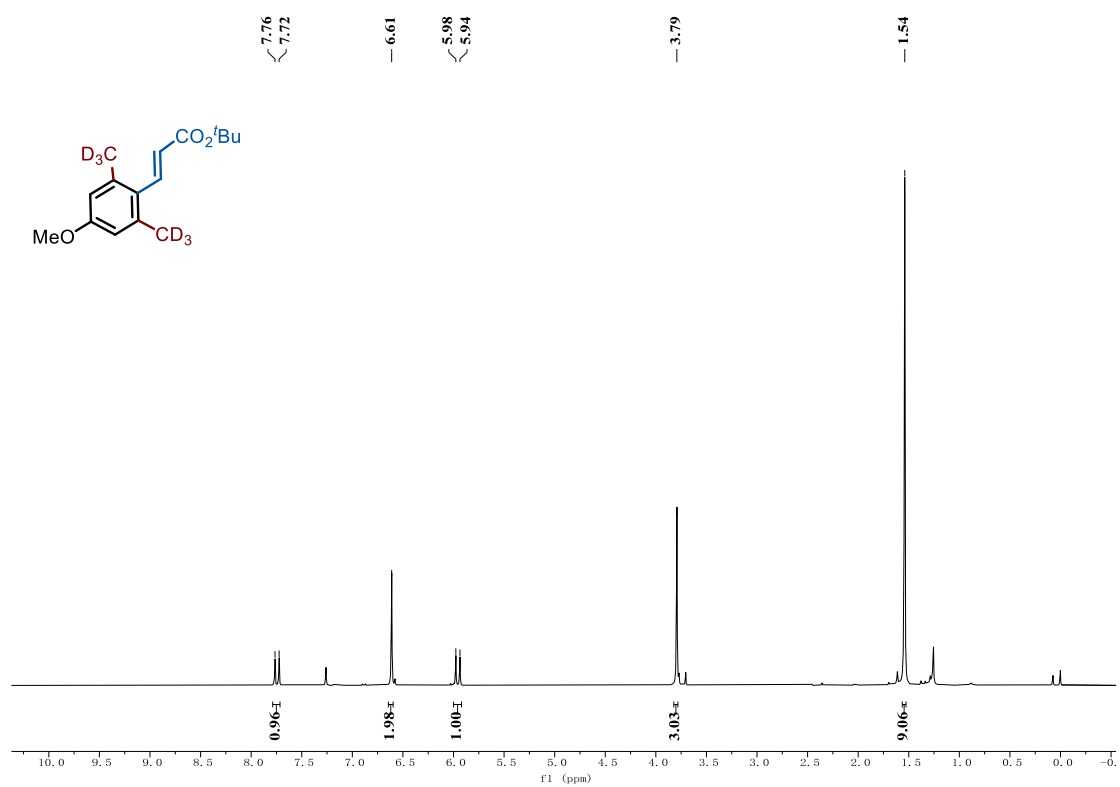

$^{13}\text{C}$  NMR of **8a** (100 MHz,  $\text{CDCl}_3$ )

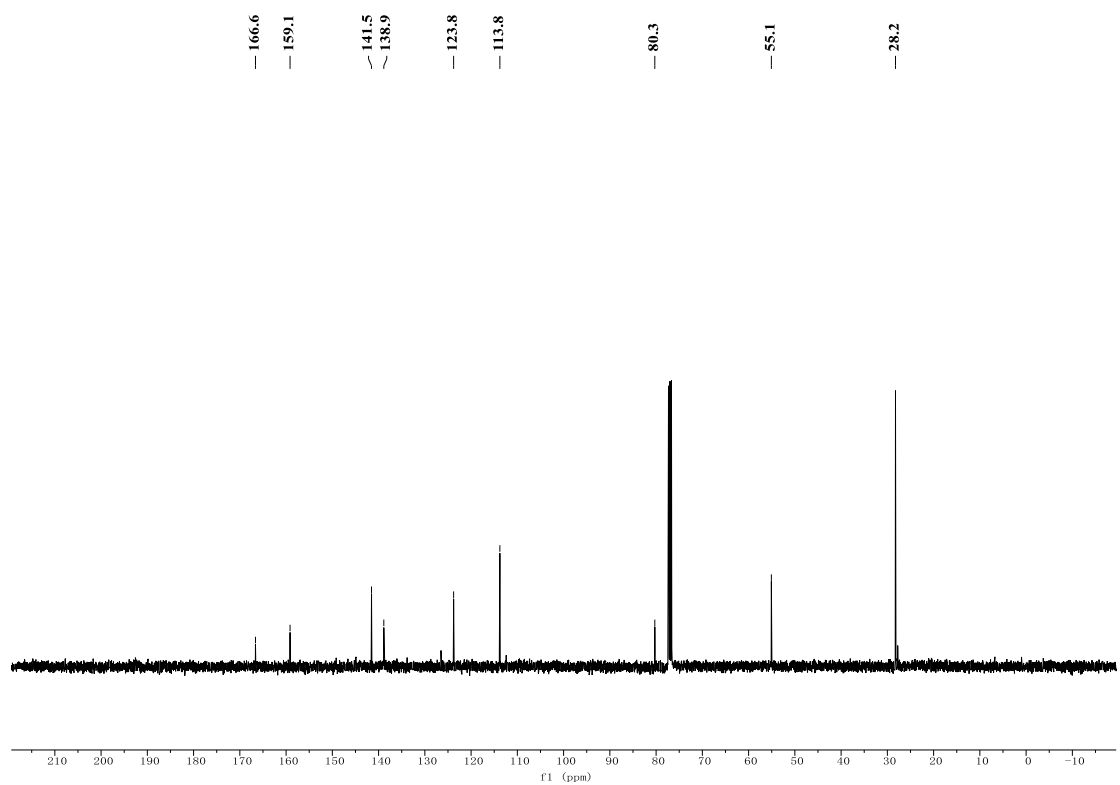

$^1\text{H}$  NMR of **8b** (400 MHz,  $\text{CDCl}_3$ )

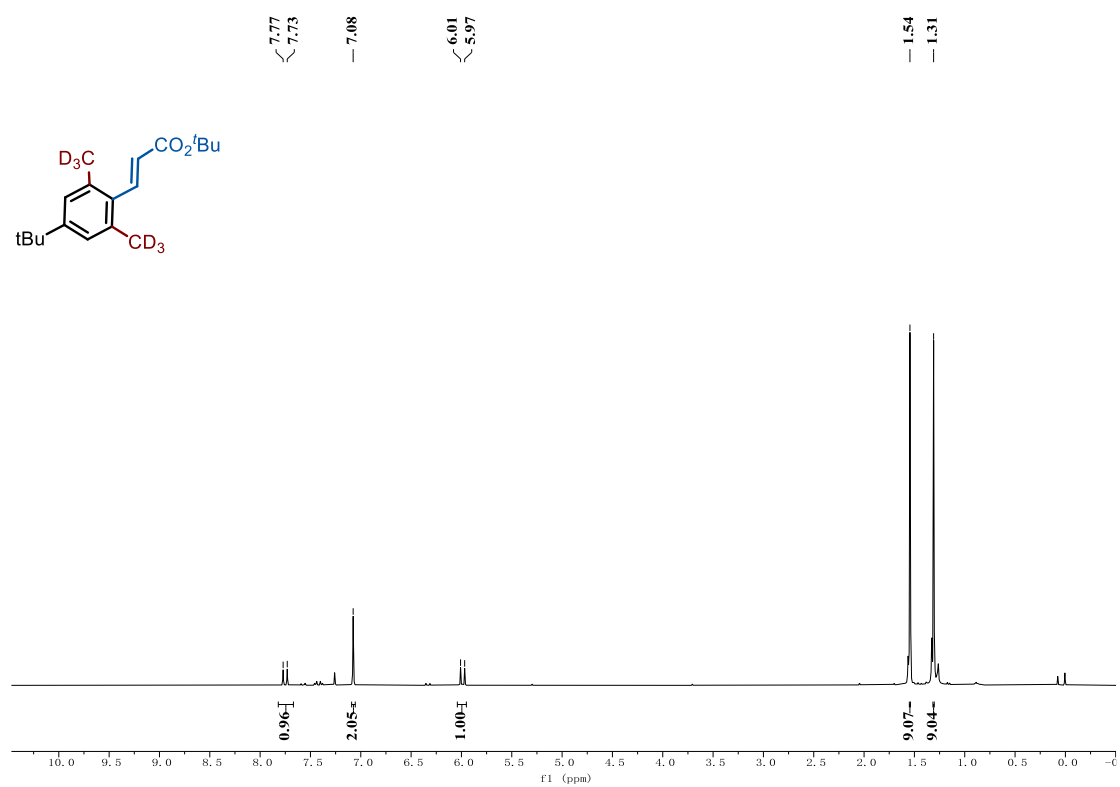

$^{13}\text{C}$  NMR of **8b** (100 MHz,  $\text{CDCl}_3$ )

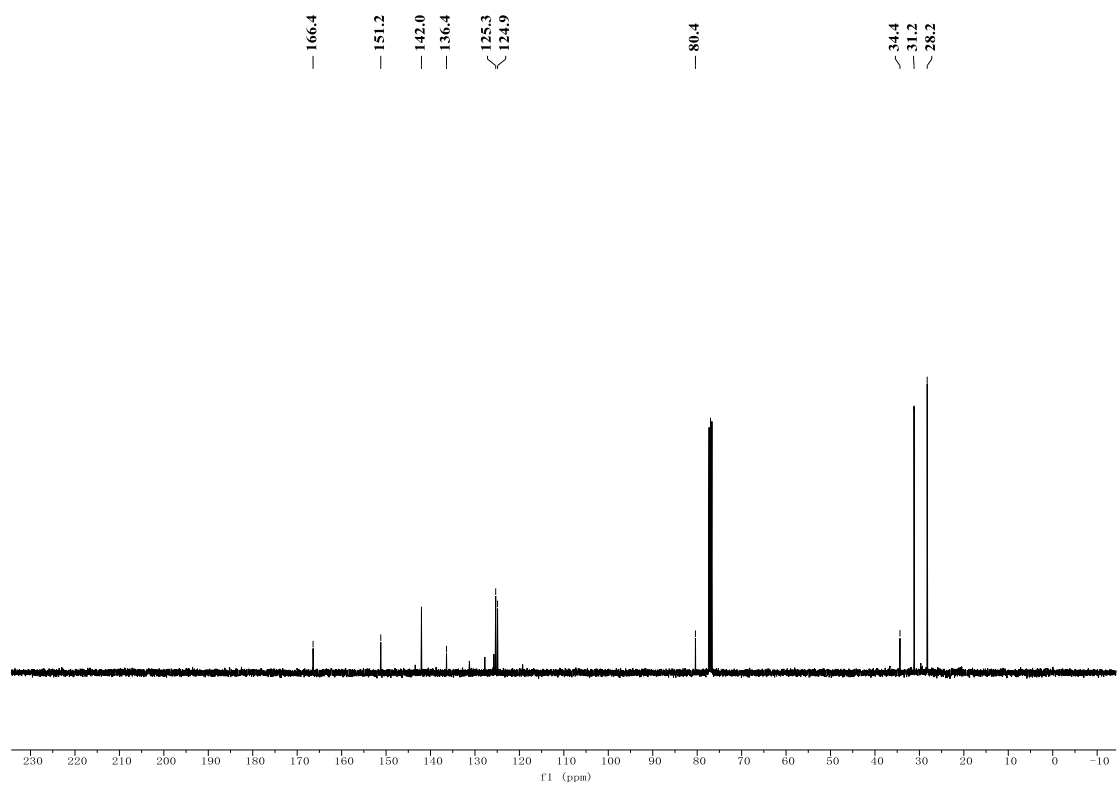

$^1\text{H}$  NMR of **8c** (400 MHz,  $\text{CDCl}_3$ )

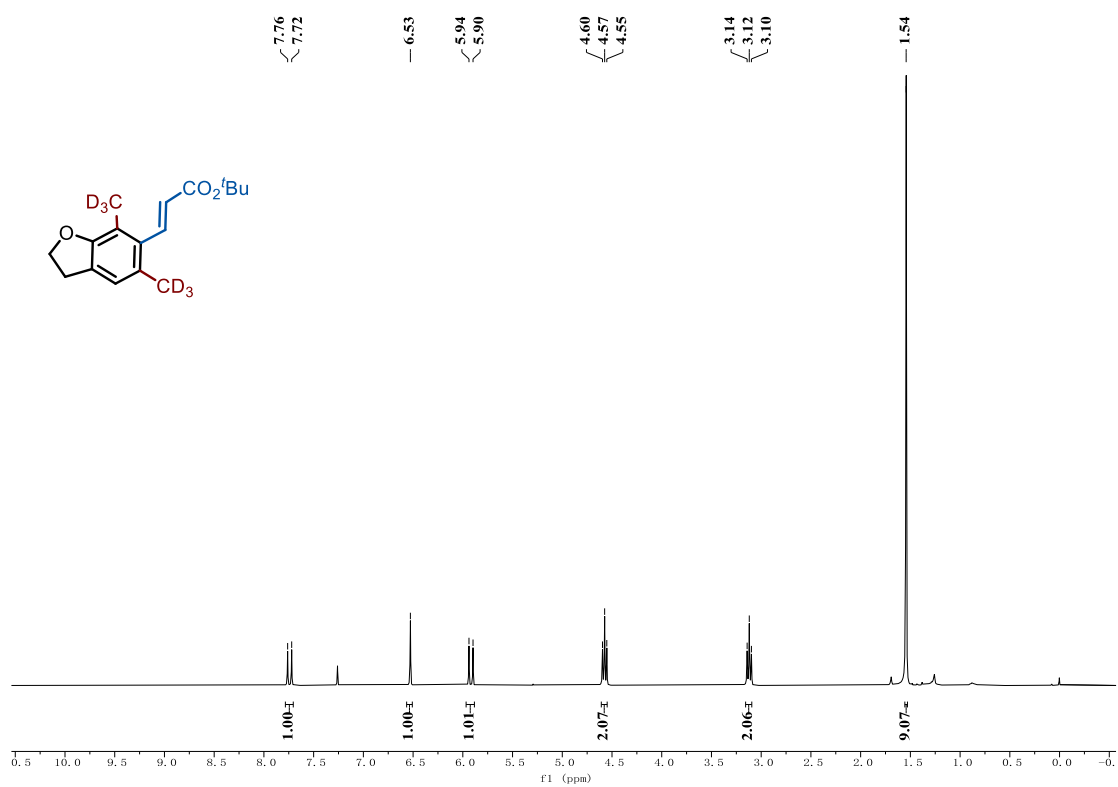

$^{13}\text{C}$  NMR of **8c** (100 MHz,  $\text{CDCl}_3$ )

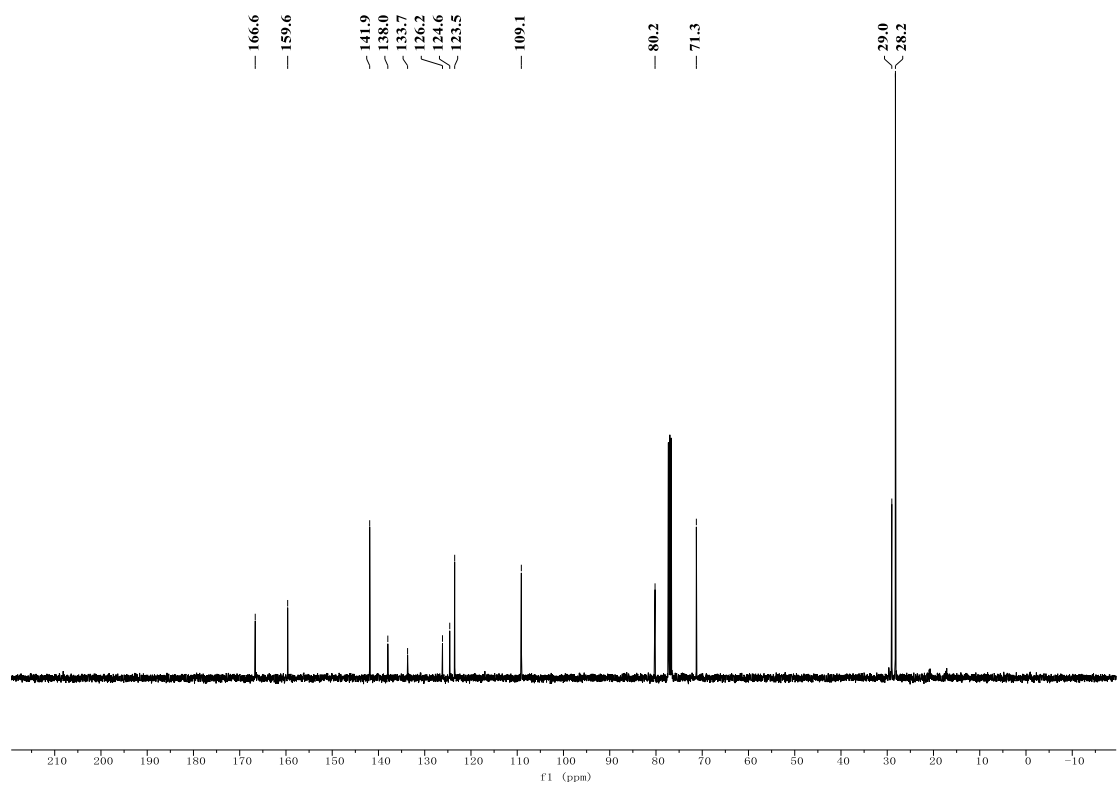



$^1\text{H}$  NMR of **8d** (400 MHz,  $\text{CDCl}_3$ )

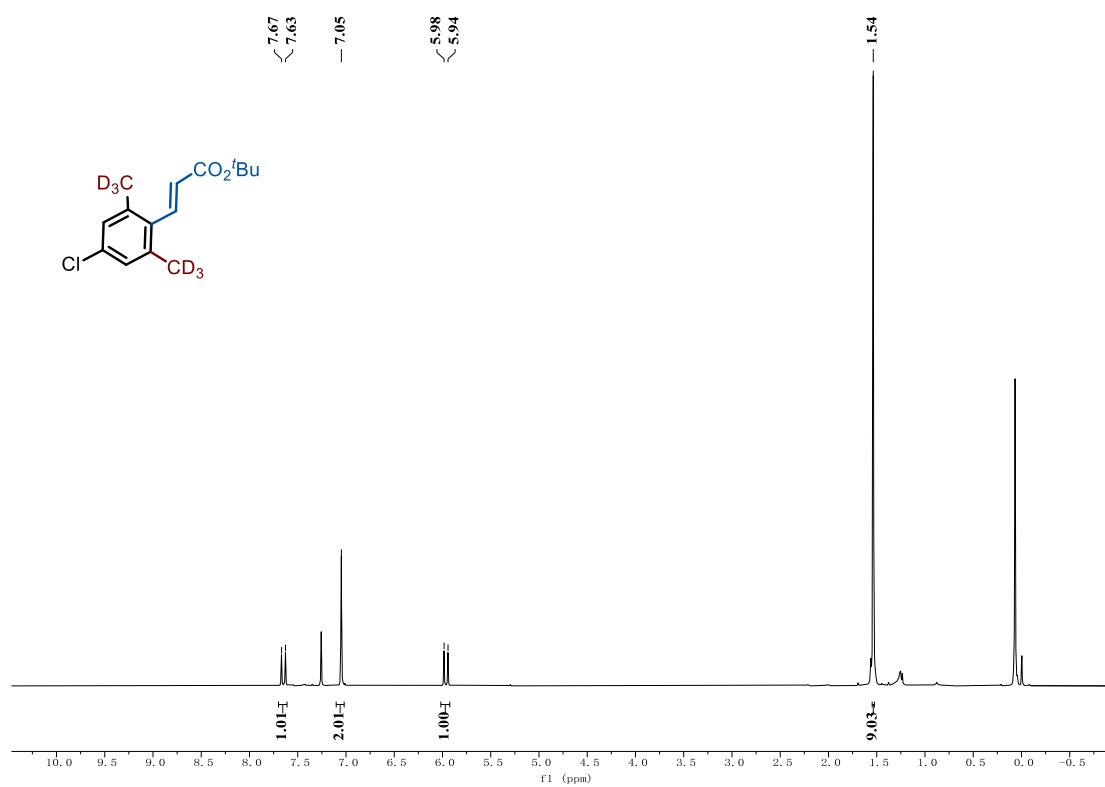

$^{13}\text{C}$  NMR of **8d** (100 MHz,  $\text{CDCl}_3$ )

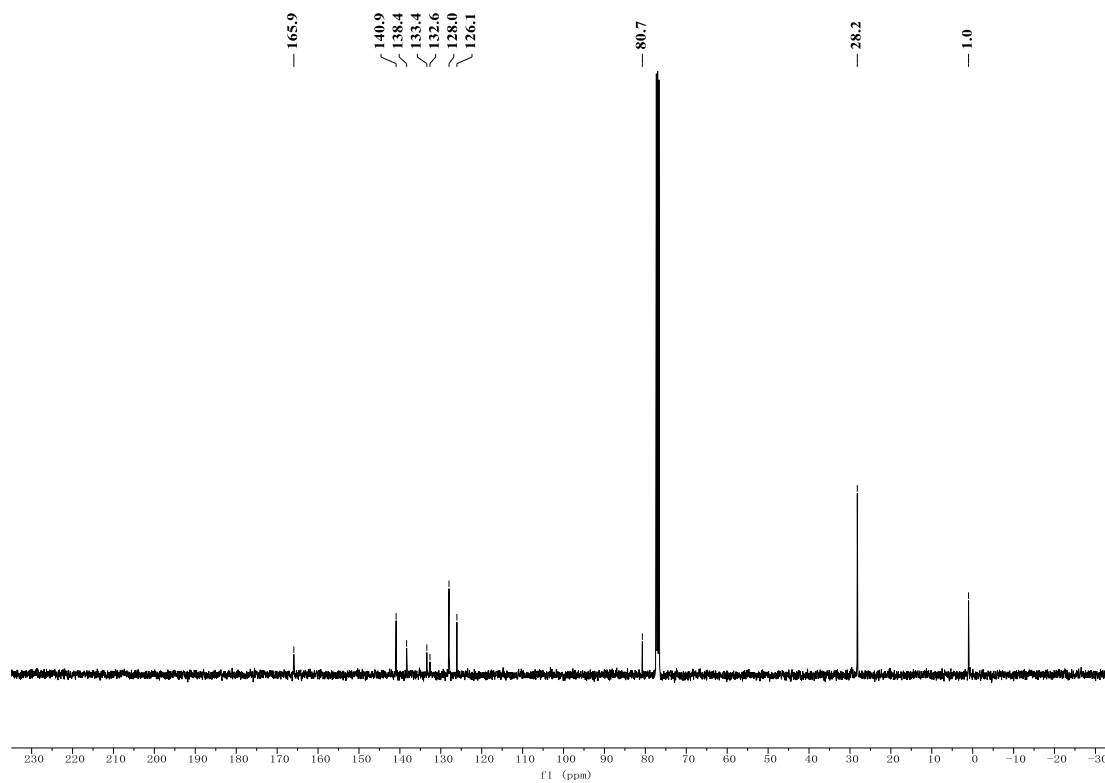

$^1\text{H}$  NMR of **9** (400 MHz,  $\text{CDCl}_3$ )

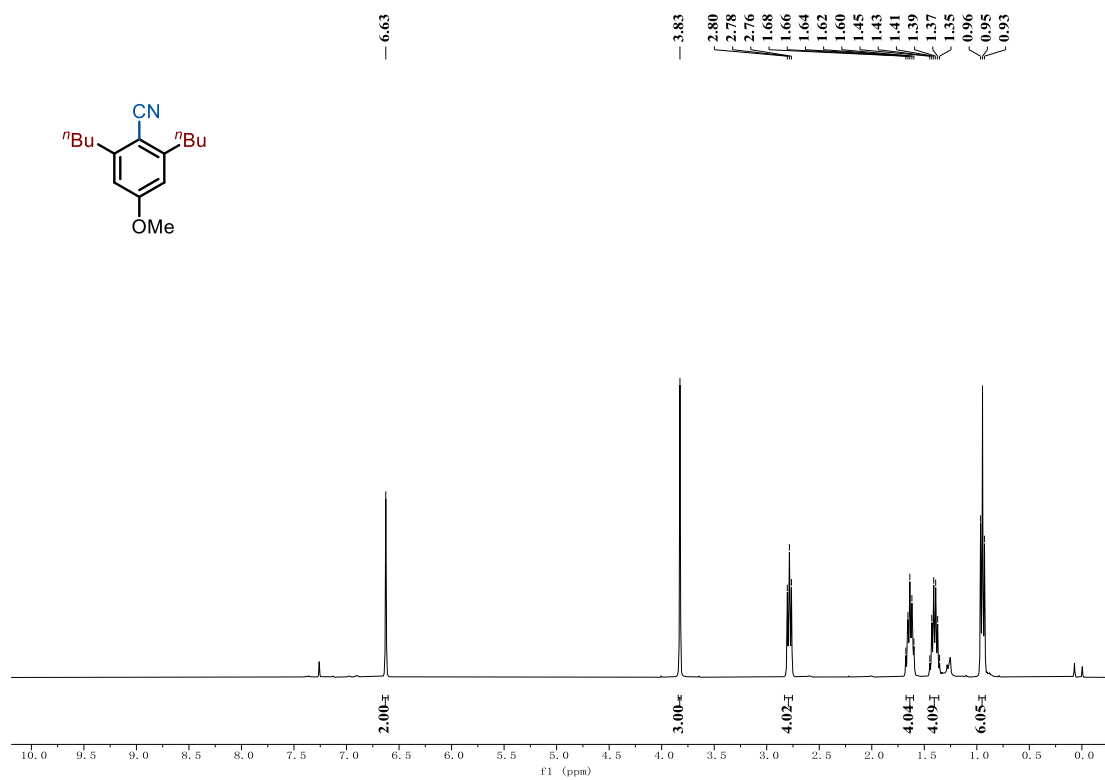

$^{13}\text{C}$  NMR of **9** (100 MHz,  $\text{CDCl}_3$ )

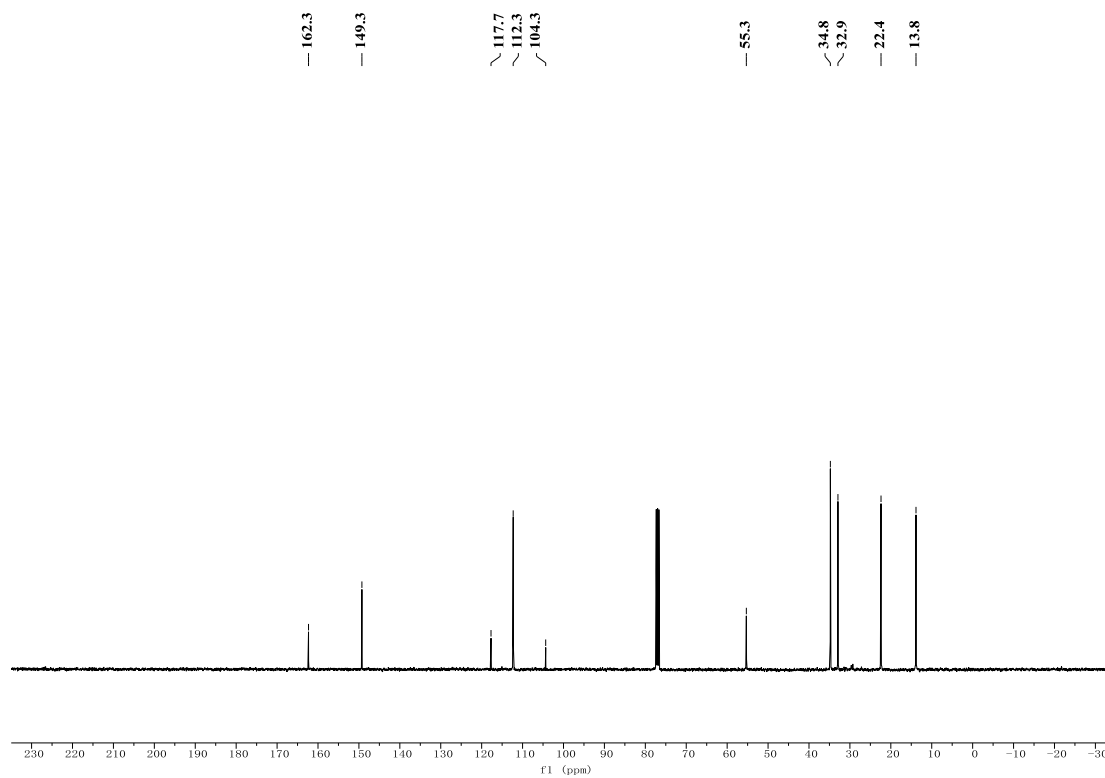

$^1\text{H}$  NMR of **10** (400 MHz,  $\text{CDCl}_3$ )

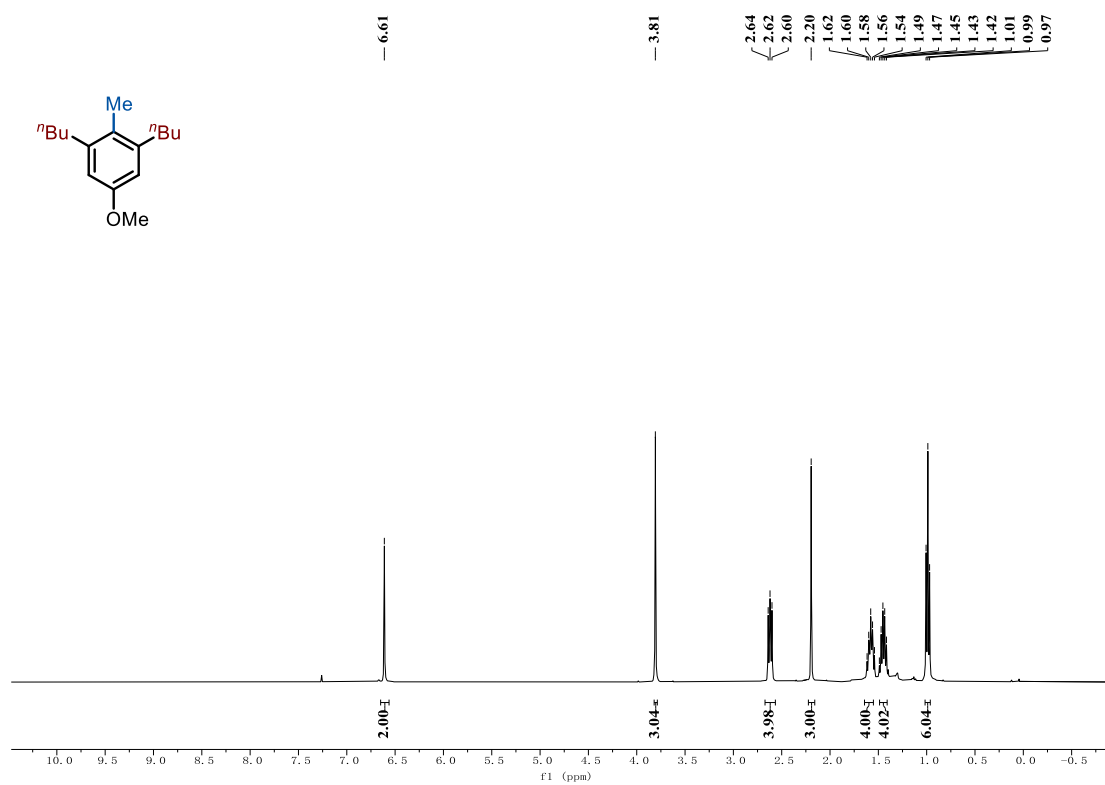

$^{13}\text{C}$  NMR of **10** (100 MHz,  $\text{CDCl}_3$ )

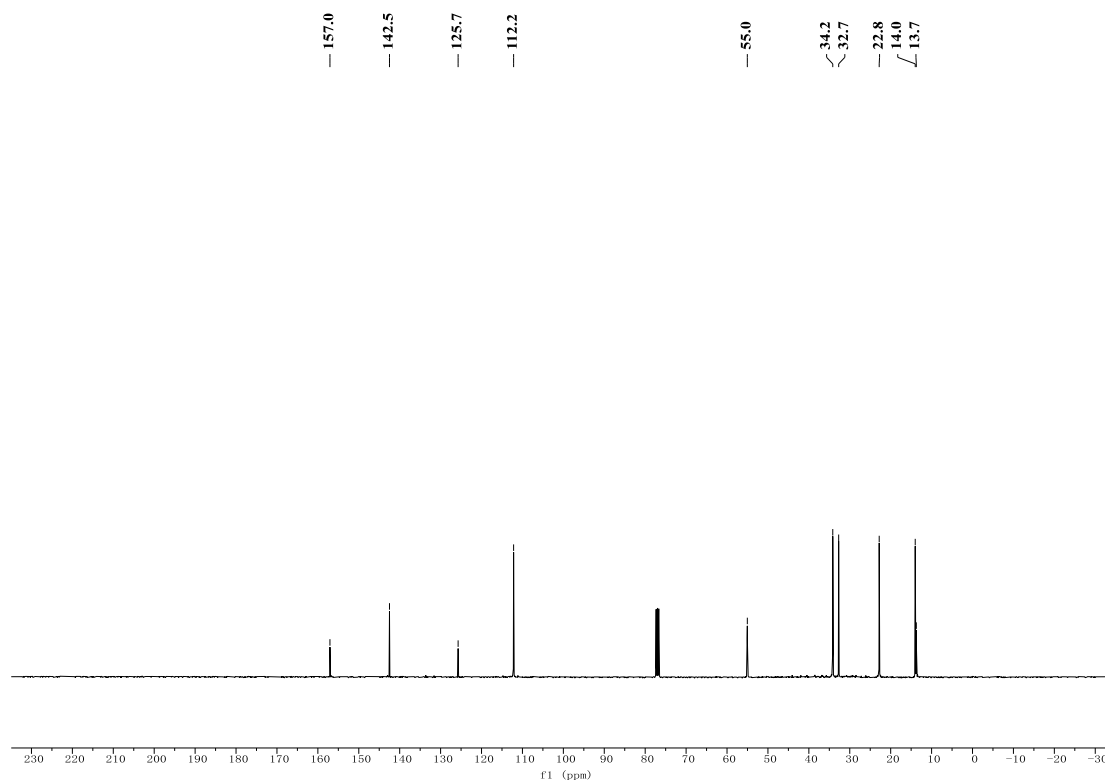

$^1\text{H}$  NMR of **11** (400 MHz,  $\text{CDCl}_3$ )

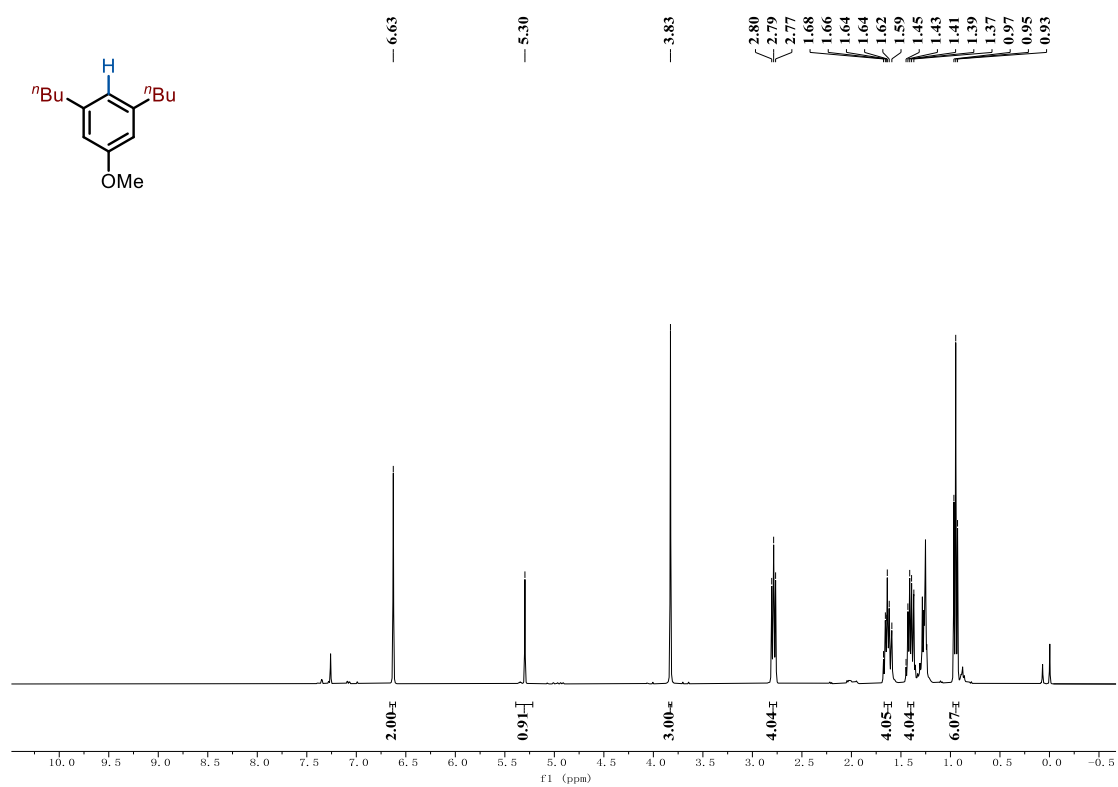

$^{13}\text{C}$  NMR of **11** (100 MHz,  $\text{CDCl}_3$ )

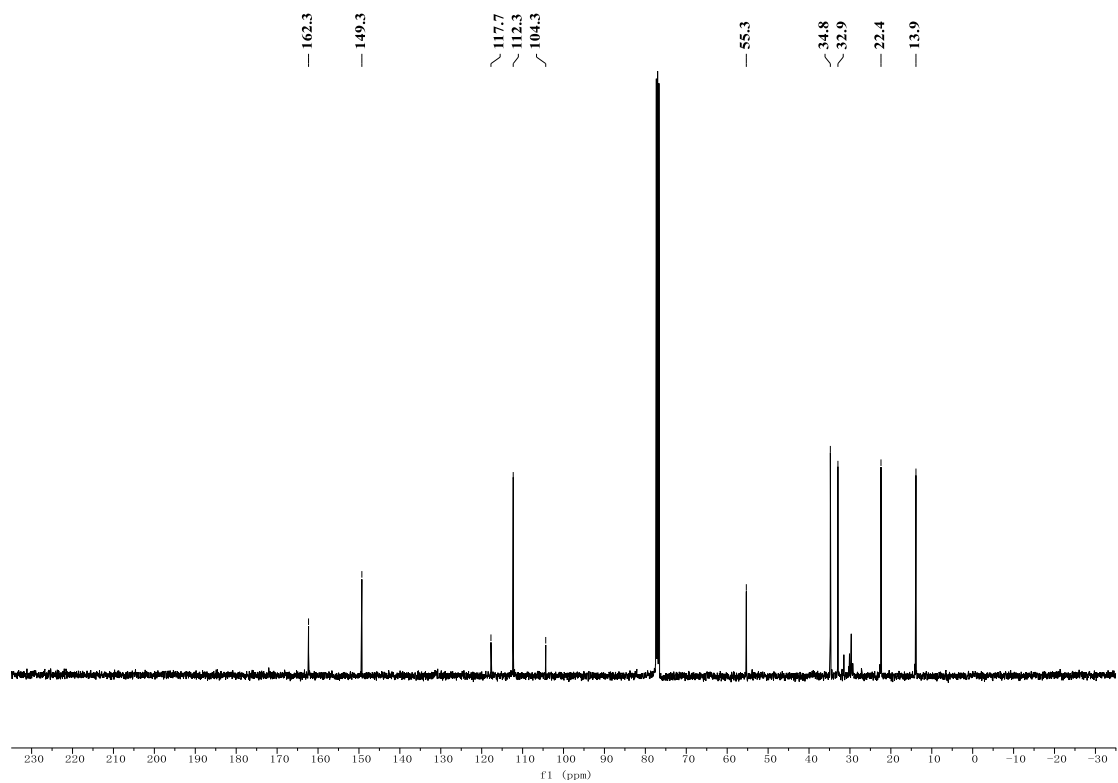

<sup>1</sup>H NMR of **12** (400 MHz, CDCl<sub>3</sub>)

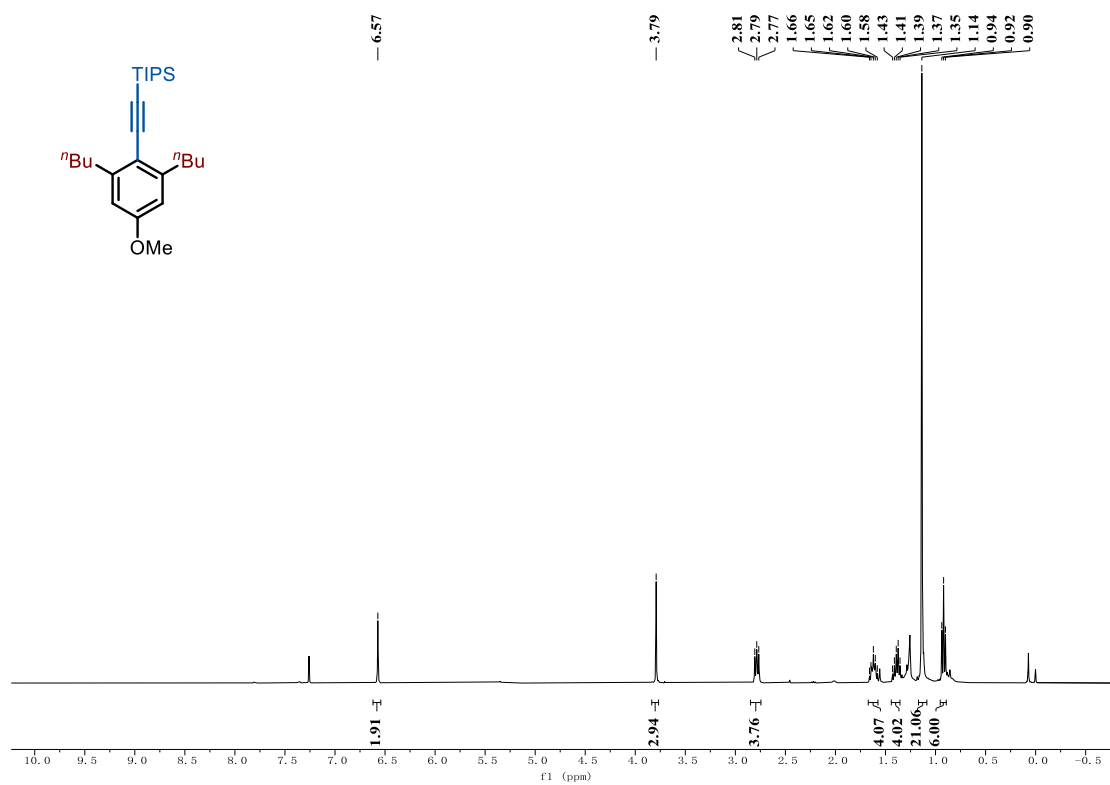

<sup>13</sup>C NMR of **12** (100 MHz, CDCl<sub>3</sub>)

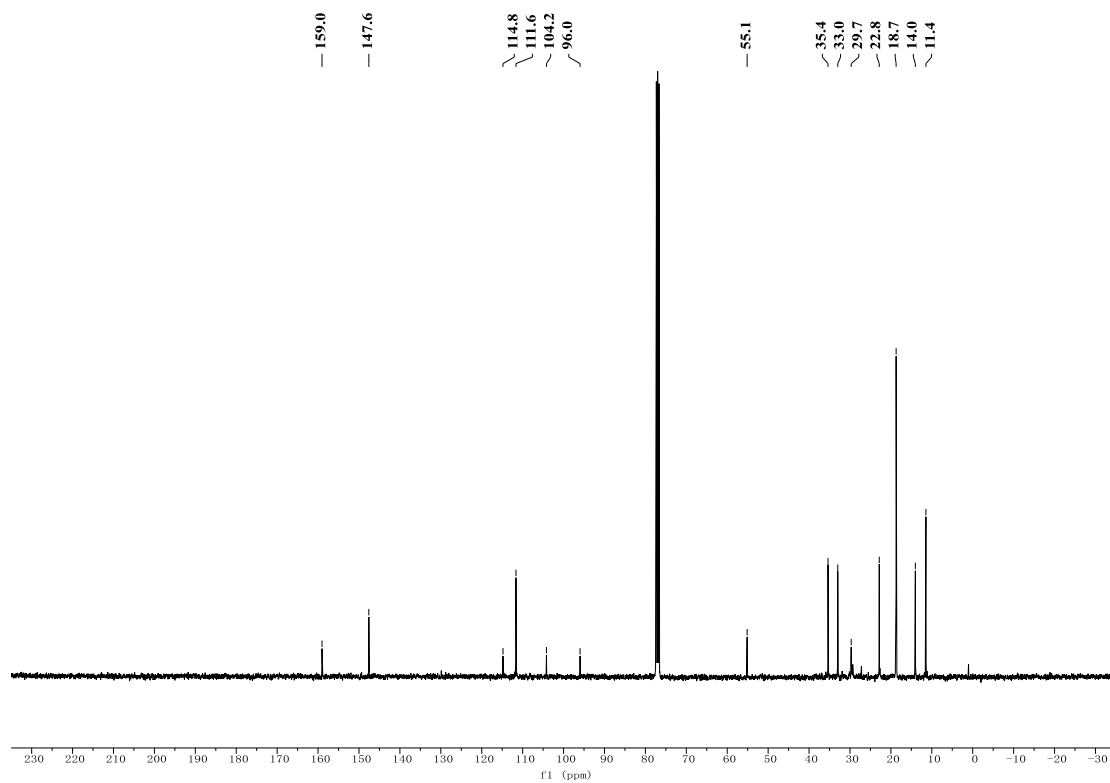

$^1\text{H}$  NMR of **13** (400 MHz,  $\text{CDCl}_3$ )

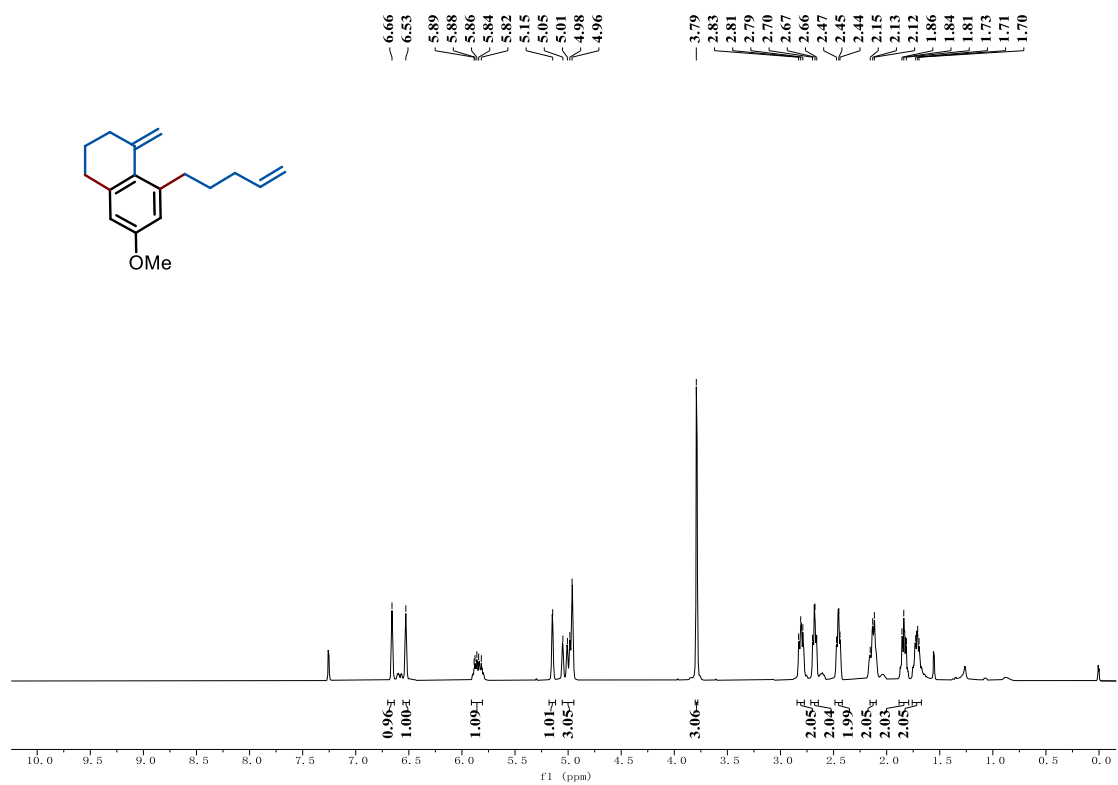

$^{13}\text{C}$  NMR of **13** (100 MHz,  $\text{CDCl}_3$ )

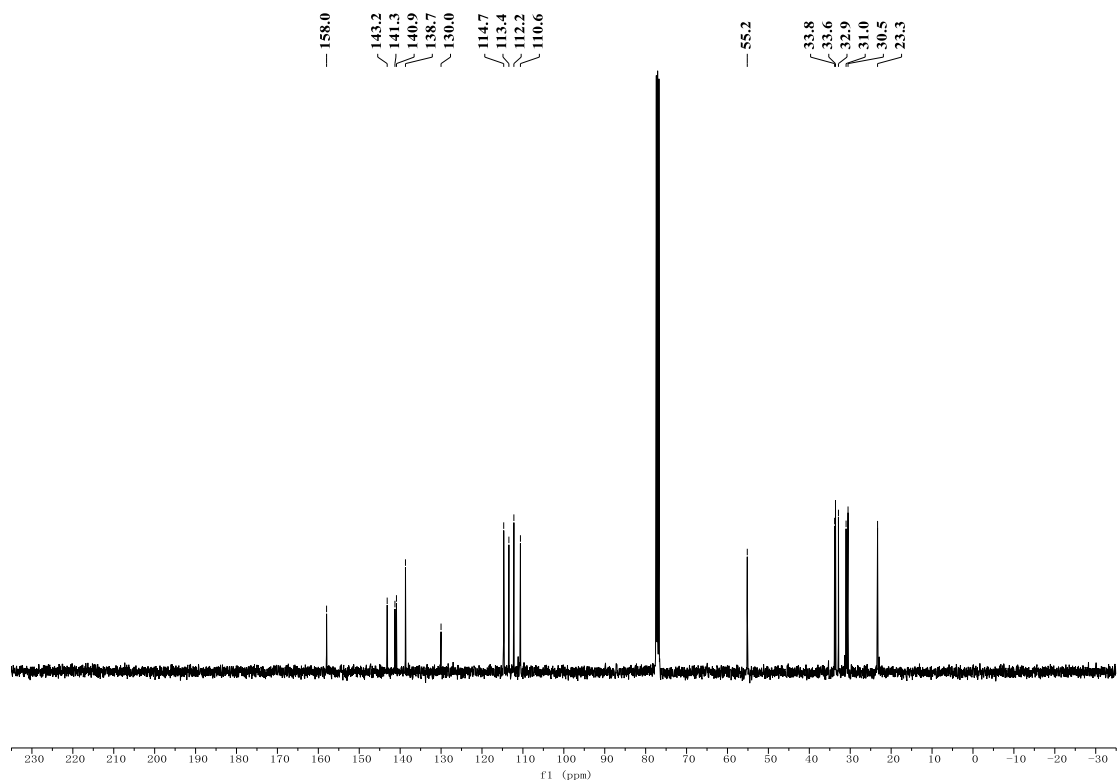

$^1\text{H}$  NMR of **15** (400 MHz,  $\text{CDCl}_3$ )

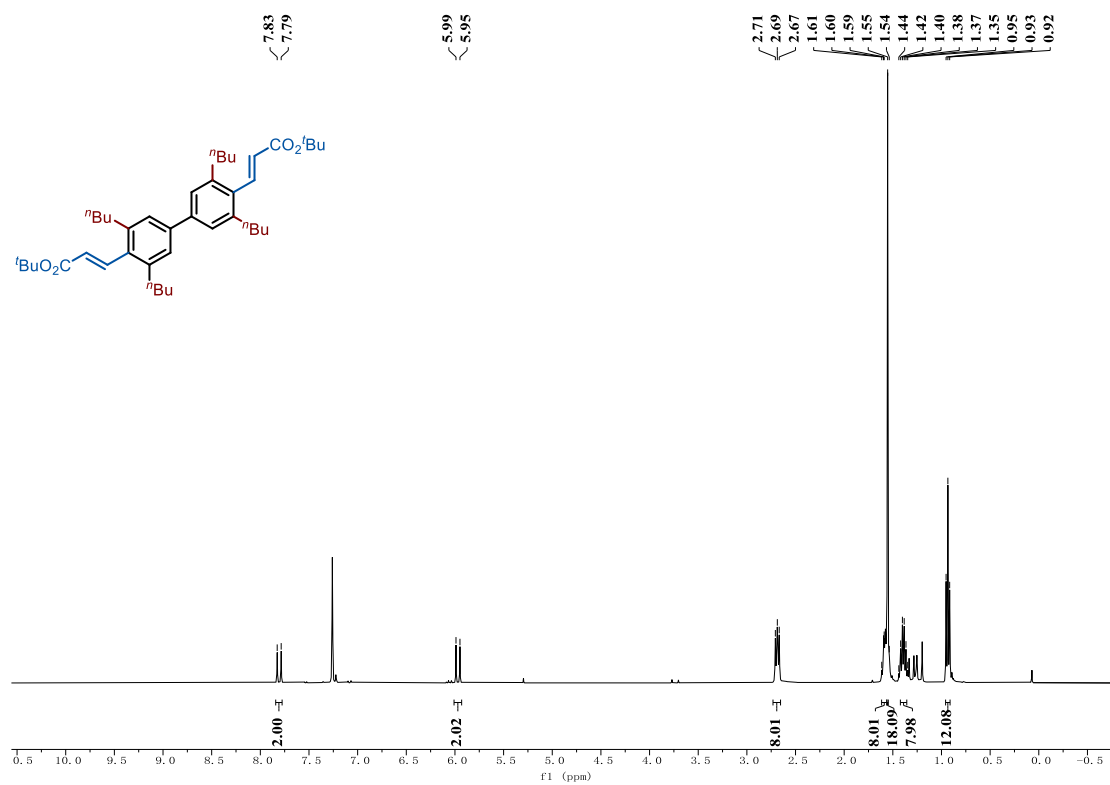

$^{13}\text{C}$  NMR of **15** (100 MHz,  $\text{CDCl}_3$ )

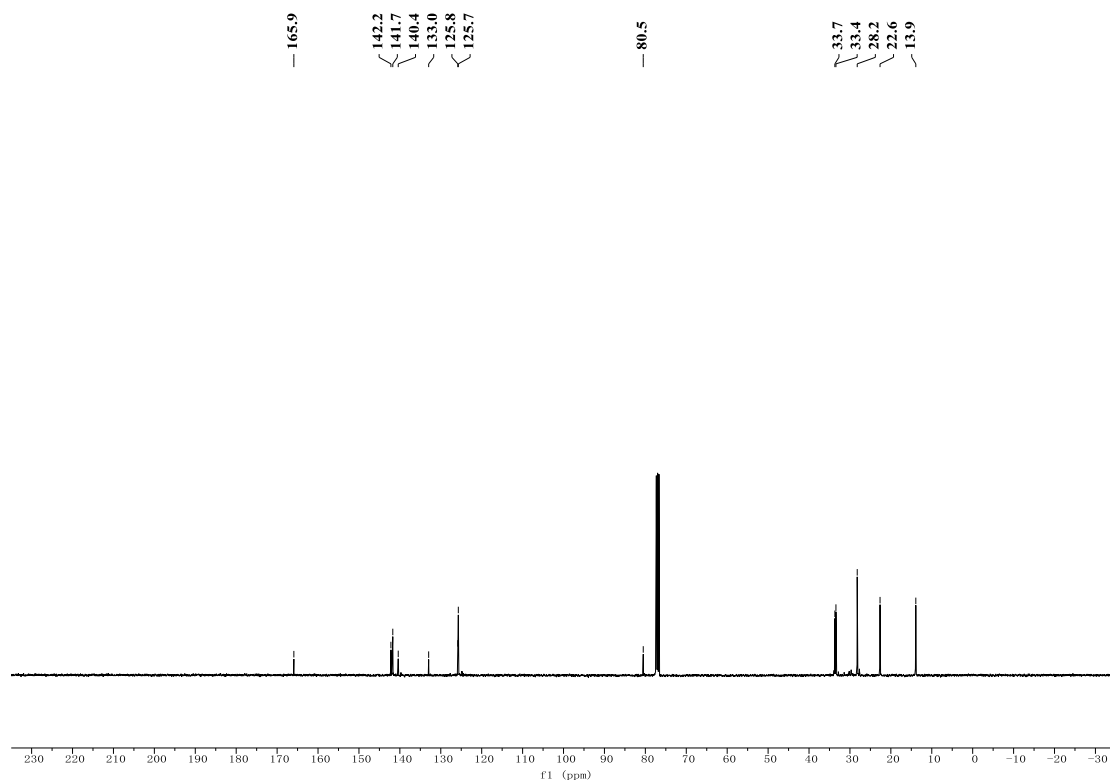

Supplement: d4cc01426j1.pdf [file d4cc01426j1.pdf]
